# Supplementary material for: Integration of Transcriptome, Gross Morphology and Histopathology in the Gill of Sea Farmed Atlantic Salmon (Salmo salar): Lessons From Multi-Site Sampling
Source: Front Genet. 2020 Jun 19;11:610. doi: 10.3389/fgene.2020.00610 (PMC7316992; doi:10.3389/fgene.2020.00610)
Supplement: Supplementary file 4 [file Table_2.XLSX]

## Sheet: Suppl Table 2
Supplementary Table 2. List of differentially expressed genes (DEGs) in gills of Atlantic salmon from sites A vs C, with the cut-off criteria
set at FDR < 0.01 and absolute Log2 FC > 1. The comparison was performed on 20 vs 13 fish from sites A and C, respectively, yielding
1360 DEGs in total.
Gene ID	Gene symbol	Transcript ID	Gene description	Log2 FC	P value	FDR
LOC106610418	LOC106610418	XM_014209785.1	GTPase IMAP family member 4-like	8.08188	0.00244821	0.00596048
LOC106610419	LOC106610419	XM_014209786.1	GTPase IMAP family member 7-like	5.55458	0.00432613	0.00988469
LOC106578349	LOC106578349	XR_001322428.1	uncharacterized LOC106578349%2C transcript variant X1	5.50263	0.000320845	0.000971987
LOC106561859	LOC106561859	XM_014126126.1	beta-1%2C3-galactosyl-O-glycosyl-glycoprotein beta-1%2C6-N-acetylglucosaminyltransferase 3-like	5.12091	1.62671e-40	5.04785e-38
LOC106598205	LOC106598205	XM_014189261.1	beta-1%2C3-galactosyl-O-glycosyl-glycoprotein beta-1%2C6-N-acetylglucosaminyltransferase 3-like	4.96617	8.10018e-56	7.11157e-53
LOC106598099	LOC106598099	XR_001327086.1	uncharacterized LOC106598099	4.88808	9.6948e-23	5.24773e-21
LOC106604507	LOC106604507	XM_014199172.1	ribonuclease-like 3	4.61345	2.04083e-20	8.34794e-19
LOC106598253	LOC106598253	XM_014189304.1	ribonuclease-like 3	4.59936	1.49825e-21	7.05906e-20
LOC106598104	LOC106598104	XM_014189175.1	ribonuclease-like 3	4.58997	1.13628e-21	5.41026e-20
LOC100196060	ang1	NM_001141089.1	Angiogenin-1	4.54203	1.4154e-22	7.48148e-21
LOC100196525	ctrl	NM_001141554.1	chymotrypsin-like	4.45276	9.68252e-19	3.20637e-17
LOC106601490	LOC106601490	XM_014193713.1	RING finger protein 208-like	4.38815	6.19867e-18	1.86717e-16
LOC106600208	LOC106600208	XR_001327731.1	uncharacterized LOC106600208	4.36351	3.48822e-21	1.57346e-19
LOC106601491	LOC106601491	XM_014193714.1	RING finger protein 186-like	4.35306	8.10202e-18	2.40231e-16
LOC106598396	LOC106598396	XR_001327174.1	uncharacterized LOC106598396	4.30634	1.06337e-15	2.30308e-14
LOC106577309	LOC106577309	XM_014155258.1	glutathione peroxidase 6-like	4.1656	3.25499e-26	2.54959e-24
LOC106564983	LOC106564983	XR_001319573.1	uncharacterized LOC106564983	4.05607	9.80952e-22	4.71401e-20
LOC106561635	LOC106561635	XM_014125761.1	ladderlectin-like	3.84434	1.2101e-19	4.49058e-18
LOC106564982	LOC106564982	XR_001319572.1	uncharacterized LOC106564982	3.83523	1.93696e-20	7.97743e-19
LOC106590728	LOC106590728	NA	NA	3.83183	6.47575e-22	3.18444e-20
LOC106600288	LOC106600288	XR_001327766.1	uncharacterized LOC106600288	3.82653	1.10746e-23	6.51376e-22
LOC106592799	LOC106592799	XM_014184132.1	uncharacterized LOC106592799	3.81427	1.40212e-09	1.19968e-08
LOC106599968	LOC106599968	XR_001327640.1	uncharacterized LOC106599968	3.77074	2.28807e-20	9.27492e-19
LOC106564984	LOC106564984	XR_001319574.1	uncharacterized LOC106564984	3.74698	1.84711e-20	7.63358e-19
LOC106564985	LOC106564985	XR_001319575.1	uncharacterized LOC106564985	3.72202	1.17019e-20	4.95554e-19
LOC106597696	LOC106597696	XR_001326983.1	uncharacterized LOC106597696	3.70313	1.67551e-20	6.98053e-19
LOC106604696	LOC106604696	XM_014199617.1	saxitoxin and tetrodotoxin-binding protein 2-like	3.67078	5.10178e-14	8.7491e-13
LOC106601685	LOC106601685	NA	NA	3.62719	6.0637e-09	4.68388e-08
LOC106610458	LOC106610458	XM_014209836.1	ecto-ADP-ribosyltransferase 4-like%2C transcript variant X2	3.5893	0.000118308	0.000396113
LOC106588495	LOC106588495	XR_001324660.1	uncharacterized LOC106588495	3.55966	9.87014e-12	1.19948e-10
LOC106597868	LOC106597868	NA	NA	3.52482	1.89673e-08	1.34109e-07
LOC106582517	LOC106582517	XR_001323326.1	uncharacterized LOC106582517%2C transcript variant X1	3.5227	1.58391e-18	5.15034e-17
LOC106567034	LOC106567034	XM_014135842.1	complement C1q-like protein 4%2C transcript variant X2	3.50883	8.29067e-72	1.24346e-68
LOC106591222	LOC106591222	XM_014182433.1	zymogen granule membrane protein 16-like%2C transcript variant X1	3.50361	2.29461e-20	9.29098e-19
LOC106591807	LOC106591807	XM_014183069.1	uncharacterized LOC106591807	3.49113	1.19811e-08	8.75498e-08
LOC106561636	LOC106561636	NA	NA	3.37617	1.0788e-16	2.71555e-15
LOC106577833	LOC106577833	XM_014156195.1	interleukin-8-like	3.36633	1.22457e-19	4.53494e-18
LOC106588483	LOC106588483	XR_001324659.1	uncharacterized LOC106588483	3.36394	2.04311e-10	2.01545e-09
LOC106592919	LOC106592919	XM_014184266.1	uncharacterized LOC106592919	3.36362	4.37046e-08	2.9171e-07
LOC106562680	LOC106562680	XM_014127661.1	zymogen granule membrane protein 16-like%2C transcript variant X1	3.33642	3.46884e-27	3.0604e-25
LOC106562681	LOC106562681	XM_014127663.1	zymogen granule membrane protein 16-like%2C transcript variant X1	3.09764	2.26965e-21	1.04607e-19
LOC106573018	LOC106573018	XM_014147615.1	carboxypeptidase A1-like	3.05181	2.95467e-23	1.66964e-21
LOC106590303	LOC106590303	XM_014181164.1	trypsin-3-like%2C transcript variant X1	3.04117	1.81387e-07	1.08585e-06
LOC106598577	LOC106598577	XM_014189609.1	carboxypeptidase A1-like	3.04059	1.26303e-24	8.19169e-23
LOC106567571	LOC106567571	XM_014137044.1	H-2 class II histocompatibility antigen%2C A-K alpha chain-like%2C transcript variant X2	3.04005	4.27811e-50	2.74991e-47
LOC106566247	LOC106566247	NA	NA	3.01	0.0038861	0.00898016
LOC106586984	LOC106586984	XM_014174772.1	high choriolytic enzyme 1-like	2.99658	6.74444e-27	5.78031e-25
LOC106603218	LOC106603218	XM_014196577.1	endonuclease domain-containing 1 protein-like	2.98984	2.86739e-10	2.75166e-09
LOC106594149	LOC106594149	XM_014185514.1	C-type lectin domain family 4 member E-like	2.92948	3.19219e-20	1.26968e-18
LOC106581219	LOC106581219	XM_014163130.1	collagenase 3-like	2.92764	1.40312e-08	1.01318e-07
LOC106587127	LOC106587127	XR_001324371.1	uncharacterized LOC106587127	2.92597	1.0984e-17	3.21446e-16
LOC100286614	hce2	NM_001146553.1	High choriolytic enzyme 2	2.91297	9.69029e-27	8.22669e-25
LOC106593829	LOC106593829	NA	NA	2.86886	9.33549e-26	6.92866e-24
LOC100195857	cbpa1	NM_001140886.1	Carboxypeptidase A1	2.85552	4.19608e-21	1.86933e-19
LOC106566533	LOC106566533	NA	NA	2.83897	2.77574e-11	3.142e-10
LOC106594015	LOC106594015	XM_014185387.1	thrombin-like enzyme cerastocytin	2.83883	3.7756e-07	2.1312e-06
LOC106566537	LOC106566537	XM_014134640.1	complement C1q tumor necrosis factor-related protein 3-like	2.82521	2.51029e-11	2.86586e-10
LOC100136453	LOC100136453	NM_001123586.1	cathelicidin	2.76655	2.01716e-06	9.87217e-06
LOC106596927	LOC106596927	XM_014188171.1	thrombin-like enzyme cerastocytin	2.76606	7.93151e-07	4.19363e-06
LOC106564436	LOC106564436	XM_014130537.1	thrombin-like enzyme cerastocytin	2.75314	9.16615e-07	4.78458e-06
LOC106595541	LOC106595541	NA	NA	2.71922	7.81212e-31	1.0532e-28
LOC106610450	LOC106610450	XM_014209829.1	erythroblast NAD(P)(+)--arginine ADP-ribosyltransferase-like	2.71771	4.11694e-18	1.27423e-16
LOC106586060	LOC106586060	XM_014172886.1	uncharacterized LOC106586060	2.7097	8.20538e-05	0.000285373
LOC106594109	LOC106594109	XM_014185479.1	C-type lectin domain family 4 member M-like	2.6915	5.87034e-19	2.00293e-17
LOC106591797	LOC106591797	XM_014183059.1	protein disulfide-isomerase-like	2.67752	1.65133e-11	1.9362e-10
LOC106581616	irg1	XM_014163747.1	immunoresponsive 1 homolog (mouse)	2.62694	4.25358e-25	2.91642e-23
LOC106595494	LOC106595494	XM_014186866.1	protein disulfide-isomerase A2-like	2.60851	4.91298e-14	8.45351e-13
LOC106591345	LOC106591345	XR_001325276.1	uncharacterized LOC106591345%2C transcript variant X1	2.58213	3.51802e-15	7.12632e-14
LOC106584756	LOC106584756	XM_014170303.1	zymogen granule membrane protein 16-like%2C transcript variant X2	2.55972	1.49481e-17	4.29769e-16
LOC106601720	LOC106601720	NA	NA	2.5489	4.44885e-13	6.65037e-12
LOC106573692	LOC106573692	XM_014148970.1	thyrotropin-releasing hormone receptor-like	2.52319	5.61475e-20	2.15468e-18
LOC106563402	LOC106563402	XR_001319249.1	uncharacterized LOC106563402	2.51111	0.000907002	0.00246738
LOC106566534	LOC106566534	XM_014134633.1	complement C1q tumor necrosis factor-related protein 3-like	2.50268	4.31195e-09	3.41653e-08
LOC106581492	LOC106581492	XM_014163567.1	P2Y purinoceptor 13-like	2.50195	1.13147e-14	2.12237e-13
LOC106579377	LOC106579377	XM_014159217.1	adhesion G protein-coupled receptor E3-like%2C transcript variant X2	2.49696	9.33552e-28	8.91357e-26
LOC106563379	LOC106563379	XM_014128884.1	endonuclease domain-containing 1 protein-like%2C transcript variant X2	2.48803	3.59276e-07	2.03726e-06
LOC106608815	LOC106608815	XM_014206975.1	endonuclease domain-containing 1 protein-like	2.46381	1.38319e-06	6.97913e-06
LOC106610904	LOC106610904	XM_014210570.1	CD209 antigen-like protein C%2C transcript variant X1	2.45962	5.50324e-27	4.75047e-25
LOC106586805	LOC106586805	XM_014174472.1	C-X-C chemokine receptor type 1-like%2C transcript variant X2	2.44944	1.40359e-19	5.15548e-18
LOC106560915	LOC106560915	XM_014124357.1	C-C motif chemokine 8-like	2.44798	1.09012e-07	6.77483e-07
LOC106576798	LOC106576798	XM_014154221.1	kynurenine 3-monooxygenase-like%2C transcript variant X3	2.43885	0.000257597	0.000797219
LOC106599048	LOC106599048	XM_014190103.1	retinol-binding protein 1-like	2.43507	5.14587e-10	4.74221e-09
LOC106604796	LOC106604796	XM_014199840.1	zonadhesin-like	2.38168	3.69193e-28	3.74352e-26
LOC106599620	LOC106599620	XM_014190911.1	flocculation protein FLO11-like%2C transcript variant X3	2.36608	8.78187e-25	5.85393e-23
LOC106561558	LOC106561558	XM_014125655.1	carboxypeptidase A1-like%2C transcript variant X3	2.36276	9.45805e-16	2.05587e-14
LOC100136458	tnf-alpha-2	NM_001123590.1	tumor necrosis factor alpha-2 precursor	2.3591	6.34357e-22	3.13228e-20
LOC106585685	ntrk2	XM_014172160.1	neurotrophic tyrosine kinase%2C receptor%2C type 2%2C transcript variant X1	2.35469	1.16044e-48	6.96187e-46
LOC106596585	LOC106596585	XR_001326716.1	uncharacterized LOC106596585	2.33393	1.92787e-06	9.47252e-06
LOC106601909	LOC106601909	XM_014194342.1	mannose-binding protein C-like	2.27633	5.80141e-14	9.85966e-13
LOC106564214	LOC106564214	XM_014130262.1	glycine-rich cell wall structural protein 1-like	2.27295	9.75631e-07	5.06619e-06
LOC106594998	LOC106594998	XR_001326255.1	caspase-14-like%2C transcript variant X1	2.25226	2.20425e-20	8.98577e-19
LOC100195784	lincr	NM_001140813.1	E3 ubiquitin-protein ligase LINCR	2.23407	1.53513e-10	1.54527e-09
LOC106611159	LOC106611159	XM_014211065.1	B2 bradykinin receptor-like	2.23277	9.12075e-29	9.74215e-27
LOC106561862	LOC106561862	XM_014126132.1	transient receptor potential cation channel subfamily M member 1-like	2.21768	4.3868e-11	4.8216e-10
LOC106589989	LOC106589989	XM_014180468.1	myosin-7-like%2C transcript variant X2	2.2063	1.9126e-17	5.39969e-16
LOC106576292	LOC106576292	XM_014153382.1	probable imidazolonepropionase	2.19679	6.79506e-29	7.30134e-27
LOC106569927	LOC106569927	XM_014141678.1	tumor necrosis factor receptor superfamily member 11B-like	2.1884	1.01781e-17	2.99322e-16
LOC106582569	col6a2	XM_014165792.1	collagen%2C type VI%2C alpha 2	2.18616	1.86814e-29	2.14158e-27
LOC106563843	LOC106563843	XM_014129744.1	uncharacterized LOC106563843	2.16822	1.4597e-18	4.76366e-17
LOC106613766	LOC106613766	XM_014216354.1	elongation factor 2-like%2C transcript variant X2	2.15613	4.81399e-147	5.77615e-143
LOC106590199	LOC106590199	XM_014180955.1	ADP-ribosyl cyclase/cyclic ADP-ribose hydrolase 1-like	2.14943	2.71846e-28	2.79582e-26
LOC106582581	LOC106582581	XM_014165806.1	collagen alpha-2(VI) chain-like	2.13444	3.53855e-25	2.46371e-23
LOC100136358	nos2	XM_014214975.1	nitric oxide synthase 2%2C inducible%2C transcript variant X1	2.12582	4.34624e-13	6.50779e-12
LOC106564981	LOC106564981	XM_014131537.1	cathepsin L1-like	2.10944	2.573e-22	1.32311e-20
LOC106613110	LOC106613110	XM_014215041.1	collagenase 3-like	2.10388	1.77106e-12	2.40479e-11
LOC106596536	LOC106596536	XR_001326702.1	uncharacterized LOC106596536	2.10115	3.72786e-05	0.000140335
LOC106610451	LOC106610451	XM_014209830.1	NAD(P)(+)--arginine ADP-ribosyltransferase 1-like	2.0982	1.2653e-12	1.76535e-11
LOC106608949	LOC106608949	XM_014207196.1	zonadhesin-like%2C transcript variant X2	2.08831	1.42446e-14	2.62678e-13
LOC106596309	LOC106596309	XR_001326638.1	uncharacterized LOC106596309	2.08272	0.000113451	0.00038166
LOC106608318	LOC106608318	XM_014206199.1	neuronal acetylcholine receptor subunit alpha-2-like	2.08159	1.00129e-12	1.4202e-11
LOC106606171	LOC106606171	XM_014202303.1	beta-microseminoprotein-like	2.0772	3.45054e-18	1.08288e-16
LOC106602653	LOC106602653	XM_014195407.1	uncharacterized protein YBL113C-like	2.07644	1.5722e-07	9.5146e-07
LOC106574919	LOC106574919	XM_014151052.1	E3 ubiquitin-protein ligase TRIM39-like	2.0525	2.24416e-25	1.60279e-23
LOC106601492	LOC106601492	XM_014193717.1	RING finger protein 208-like%2C transcript variant X2	2.0495	4.47213e-11	4.90939e-10
LOC106578890	LOC106578890	XM_014158126.1	snaclec 1-like	2.03134	2.9875e-21	1.35609e-19
LOC106563598	LOC106563598	XR_001319285.1	uncharacterized LOC106563598	2.02456	8.35684e-13	1.19894e-11
LOC106568806	LOC106568806	XM_014139470.1	V-type proton ATPase subunit d 1-like	2.01874	2.13124e-06	1.03923e-05
LOC100196492	cdo1	NM_001141521.2	cysteine dioxygenase type 1	2.01722	4.47253e-12	5.71709e-11
LOC106562353	LOC106562353	XR_001319014.1	uncharacterized LOC106562353%2C transcript variant X2	2.00605	9.45183e-21	4.06485e-19
LOC106598913	LOC106598913	XM_014189938.1	zinc finger protein Gfi-1-like	1.99776	1.71345e-25	1.23354e-23
LOC106590712	LOC106590712	XM_014181871.1	galectin-2-like	1.99681	3.79209e-12	4.90181e-11
LOC106577874	LOC106577874	XR_001322211.1	uncharacterized LOC106577874	1.99479	6.53528e-09	5.02443e-08
LOC106571734	LOC106571734	XM_014145136.1	phospholipase B1%2C membrane-associated-like	1.9816	4.80136e-09	3.77028e-08
LOC106602965	zic3	XM_014196026.1	Zic family member 3%2C transcript variant X2	1.97841	2.37011e-15	4.88909e-14
LOC106596606	LOC106596606	XR_001326721.1	uncharacterized LOC106596606	1.96892	3.55131e-05	0.000134278
LOC106592639	LOC106592639	XM_014183977.1	zinc finger protein 501-like	1.96879	0.00032629	0.00098624
LOC100196468	mbl2	NM_001141497.1	Mannose-binding protein C	1.96856	1.16361e-11	1.39898e-10
LOC106607416	LOC106607416	XM_014204341.1	perforin-1-like	1.96684	1.66339e-12	2.268e-11
LOC106596025	LOC106596025	XR_001326546.1	uncharacterized LOC106596025	1.96141	1.33927e-05	5.55462e-05
LOC106594709	LOC106594709	XR_001326186.1	uncharacterized LOC106594709	1.96062	2.35918e-06	1.13927e-05
LOC106583422	LOC106583422	XM_014167570.1	Rieske domain-containing protein-like%2C transcript variant X3	1.95973	2.19414e-31	3.12175e-29
LOC106579249	LOC106579249	XM_014158984.1	cytochrome c oxidase subunit 6B1-like%2C transcript variant X1	1.94622	2.75715e-24	1.72303e-22
LOC106602034	LOC106602034	XM_014194482.1	mannose-binding protein C-like	1.94567	1.3289e-11	1.58552e-10
LOC106602285	LOC106602285	XM_014194818.1	hydroperoxide isomerase ALOXE3-like	1.94437	5.93226e-07	3.22078e-06
LOC106596584	LOC106596584	XR_001326715.1	uncharacterized LOC106596584	1.94103	8.95315e-07	4.68699e-06
LOC106579965	LOC106579965	XM_014160430.1	P2X purinoceptor 4-like	1.926	9.11741e-08	5.7547e-07
LOC106590985	LOC106590985	XR_001325151.1	uncharacterized LOC106590985	1.92584	3.49083e-05	0.000132311
LOC106583432	LOC106583432	XM_014167588.1	interferon-induced protein 44-like	1.92291	2.09914e-43	8.88947e-41
LOC100286729	roa2	NM_001146669.1	Heterogeneous nuclear ribonucleoproteins A2/B1	1.91856	6.38583e-09	4.91163e-08
LOC106576438	LOC106576438	XM_014153617.1	normal mucosa of esophagus-specific gene 1 protein-like	1.91562	1.55012e-22	8.15759e-21
LOC100194965	ef2	XM_014169273.1	Elongation factor 2%2C transcript variant X1	1.91537	3.60034e-129	2.59196e-125
LOC106560917	LOC106560917	XM_014124361.1	olfactomedin-4-like	1.91009	3.34972e-10	3.17976e-09
LOC106590538	LOC106590538	XM_014181646.1	lipocalin-like	1.90993	2.37792e-07	1.39497e-06
LOC106583407	LOC106583407	XR_001323510.1	uncharacterized LOC106583407	1.90708	0.00181346	0.0045653
LOC106605634	LOC106605634	XM_014201494.1	neural cell adhesion molecule 1-B-like%2C transcript variant X2	1.9007	5.01872e-28	4.94942e-26
LOC106606805	LOC106606805	XM_014203162.1	GDP-L-fucose synthase-like%2C transcript variant X4	1.89886	0.000392039	0.00116185
LOC106581884	LOC106581884	XM_014164325.1	C-X-C chemokine receptor type 1-like	1.89771	6.52276e-26	4.93263e-24
LOC106584346	LOC106584346	XM_014169556.1	uncharacterized LOC106584346%2C transcript variant X3	1.89693	3.76401e-16	8.71313e-15
LOC106596024	LOC106596024	XR_001326545.1	uncharacterized LOC106596024	1.89629	2.30149e-05	9.07487e-05
LOC106602223	LOC106602223	XM_014194739.1	C-type lectin domain family 6 member A-like	1.88606	1.81183e-18	5.85328e-17
LOC106561379	LOC106561379	XM_014125266.1	pyrin-like	1.88576	8.10532e-32	1.21062e-29
LOC106561622	LOC106561622	XM_014125747.1	cytochrome c oxidase subunit 8B%2C mitochondrial-like	1.8841	7.54159e-10	6.77313e-09
LOC106608560	LOC106608560	XM_014206527.1	actin cytoskeleton-regulatory complex protein PAN1-like	1.87382	4.8874e-12	6.20116e-11
LOC106575436	LOC106575436	NA	NA	1.87161	1.69193e-05	6.86071e-05
LOC106597653	LOC106597653	XM_014188812.1	collagen alpha-1(XV) chain-like	1.86975	2.39099e-11	2.73748e-10
LOC106596623	LOC106596623	XR_001326723.1	uncharacterized LOC106596623	1.86776	1.67564e-05	6.80386e-05
LOC106580394	LOC106580394	XM_014161399.1	L-serine dehydratase/L-threonine deaminase-like	1.86676	2.11368e-30	2.76669e-28
LOC106562433	LOC106562433	XM_014127320.1	cocaine- and amphetamine-regulated transcript protein-like	1.85983	7.55983e-08	4.83947e-07
LOC100195830	nar4	NM_001140859.2	Ecto-ADP-ribosyltransferase 4	1.85489	7.93909e-10	7.10177e-09
LOC106578921	LOC106578921	XM_014158188.1	alpha-synuclein-like%2C transcript variant X1	1.85325	2.38286e-18	7.59516e-17
LOC106579498	LOC106579498	XM_014159443.1	eotaxin-like	1.85294	2.76998e-14	4.9336e-13
LOC106606380	LOC106606380	XM_014202534.1	basigin-like	1.84768	1.17974e-20	4.98426e-19
LOC106566950	LOC106566950	NA	NA	1.84608	0.000479601	0.0013938
LOC106597530	LOC106597530	XR_001326956.1	uncharacterized LOC106597530	1.83567	3.96795e-14	6.91673e-13
LOC106562901	LOC106562901	XR_001319139.1	uncharacterized LOC106562901	1.83216	3.17514e-09	2.56952e-08
LOC106561985	LOC106561985	XM_014126490.1	chemokine-like factor%2C transcript variant X1	1.82314	1.02023e-33	1.84544e-31
LOC106590529	LOC106590529	XM_014181632.1	lipocalin-like	1.81515	5.06094e-10	4.66992e-09
LOC106560518	LOC106560518	XM_014123490.1	leucine-rich repeat-containing protein 19-like%2C transcript variant X2	1.81219	9.29644e-16	2.02196e-14
LOC106596754	LOC106596754	XR_001326756.1	uncharacterized LOC106596754	1.80629	1.29002e-12	1.79565e-11
LOC106597362	LOC106597362	XR_001326921.1	uncharacterized LOC106597362	1.8005	7.27801e-12	8.9842e-11
LOC106563790	LOC106563790	XM_014129644.1	uncharacterized LOC106563790%2C transcript variant X2	1.79878	0.00102254	0.00274414
LOC106604607	LOC106604607	XM_014199430.1	endonuclease domain-containing 1 protein-like	1.79308	5.92391e-07	3.21722e-06
LOC106606075	LOC106606075	XM_014202171.1	uncharacterized LOC106606075%2C transcript variant X2	1.78567	3.69399e-44	1.70473e-41
LOC106589580	LOC106589580	XM_014179723.1	class A basic helix-loop-helix protein 15-like	1.78513	5.16473e-09	4.03012e-08
LOC100286643	leg4	NM_001146582.1	Galectin-4	1.77912	2.00641e-37	4.81484e-35
LOC106609709	LOC106609709	XM_014208680.1	complement C1q-like protein 2	1.77412	3.06629e-05	0.000117858
LOC106596487	LOC106596487	XM_014187765.1	complement C1q-like protein 2	1.77228	3.12043e-05	0.00011962
LOC106592632	LOC106592632	XM_014183971.1	complement C1q-like protein 2	1.77068	3.14983e-05	0.000120631
LOC106597780	LOC106597780	XR_001326999.1	uncharacterized LOC106597780	1.75129	1.06981e-11	1.29224e-10
LOC106565927	LOC106565927	XM_014133622.1	src-like-adapter 2	1.74638	6.54068e-09	5.02751e-08
LOC106564758	LOC106564758	XM_014131102.1	cholecystokinin-like	1.74375	2.67479e-09	2.18722e-08
LOC100380441	slc5a12	NM_001173725.1	solute carrier family 5 (sodium/monocarboxylate cotransporter)%2C member 12	1.74371	3.06794e-10	2.92927e-09
LOC106573855	LOC106573855	XM_014149265.1	E3 ubiquitin-protein ligase TRIM39-like	1.74163	6.67444e-29	7.21481e-27
LOC106600723	LOC106600723	XM_014192301.1	tryptase-like	1.74132	5.80331e-26	4.42576e-24
LOC106560913	LOC106560913	XM_014124350.1	ABC transporter G family member 23-like	1.74081	1.24901e-19	4.6207e-18
LOC106564963	LOC106564963	XM_014131520.1	keratin%2C type I cytoskeletal 42-like	1.74078	6.25967e-10	5.69285e-09
LOC106607345	LOC106607345	NA	NA	1.73964	1.47964e-29	1.73489e-27
LOC106562114	LOC106562114	XM_014126713.1	ADM-like	1.73738	1.5372e-22	8.10147e-21
LOC106583410	LOC106583410	XM_014167538.1	otopetrin-1-like	1.73557	1.22737e-16	3.06808e-15
LOC100195820	hepc1	NM_001140849.1	Hepcidin-1	1.73316	5.23578e-06	2.36263e-05
LOC106584847	LOC106584847	XM_014170450.1	beta-1%2C3-galactosyl-O-glycosyl-glycoprotein beta-1%2C6-N-acetylglucosaminyltransferase 3-like	1.73168	3.46944e-15	7.03584e-14
LOC106593158	LOC106593158	XR_001325801.1	uncharacterized LOC106593158	1.72725	6.56419e-06	2.89955e-05
LOC106584237	LOC106584237	XM_014169289.1	ral guanine nucleotide dissociation stimulator-like 1	1.72654	5.98667e-40	1.76636e-37
LOC106563742	LOC106563742	XM_014129576.1	uncharacterized LOC106563742	1.72588	9.49972e-13	1.35159e-11
LOC106594702	LOC106594702	XM_014186099.1	caspase-14-like%2C transcript variant X2	1.72281	4.57703e-15	9.1378e-14
LOC106590756	LOC106590756	XM_014181916.1	caspase-14-like%2C transcript variant X2	1.7223	6.71721e-15	1.30558e-13
LOC106570801	LOC106570801	XM_014143337.1	calcium/calmodulin-dependent protein kinase type II subunit beta-like	1.72225	2.61791e-11	2.97833e-10
LOC106596785	LOC106596785	XM_014188044.1	CD97 antigen-like	1.7094	2.38433e-20	9.62178e-19
LOC106588527	LOC106588527	XM_014177662.1	cholecystokinin-like%2C transcript variant X2	1.70936	2.96699e-10	2.84118e-09
LOC106613971	LOC106613971	XR_001330582.1	uncharacterized LOC106613971	1.70753	0.00215171	0.00532434
LOC100286644	c209a	NM_001146583.1	CD209 antigen-like protein A	1.70561	8.89451e-13	1.27195e-11
LOC106600680	LOC106600680	XR_001327883.1	uncharacterized LOC106600680%2C transcript variant X4	1.70082	4.18999e-66	6.03291e-63
LOC106564757	LOC106564757	XM_014131101.1	keratin%2C type I cytoskeletal 19-like	1.70056	1.48424e-09	1.26424e-08
LOC100196572	ddn1	NM_001141601.1	Duodenase-1	1.69809	1.07064e-32	1.6903e-30
LOC106602156	LOC106602156	XR_001328177.1	uncharacterized LOC106602156	1.69768	7.05313e-15	1.36717e-13
LOC106579089	LOC106579089	XM_014158636.1	alpha-tectorin-like	1.6962	1.64663e-16	4.03211e-15
LOC106591057	LOC106591057	XR_001325180.1	uncharacterized LOC106591057	1.69148	1.99496e-27	1.8134e-25
LOC106606771	LOC106606771	XM_014203129.1	adhesion G protein-coupled receptor E2-like	1.68811	4.96049e-36	1.06921e-33
LOC106567402	LOC106567402	XM_014136597.1	scavenger receptor cysteine-rich domain-containing group B protein-like%2C transcript variant X2	1.68132	2.3328e-26	1.86604e-24
LOC106606782	LOC106606782	NA	NA	1.67338	6.33929e-07	3.41959e-06
LOC106568603	LOC106568603	XM_014139057.1	endonuclease domain-containing 1 protein-like	1.67233	1.10765e-06	5.70158e-06
LOC106587473	LOC106587473	XM_014175887.1	plakophilin-3-like%2C transcript variant X2	1.66596	6.90498e-05	0.000244469
LOC106608294	LOC106608294	XM_014206157.1	proto-oncogene c-Fos-like	1.66415	0.00117832	0.00311896
LOC106598291	LOC106598291	NA	NA	1.66287	0.000165277	0.000535394
LOC106576253	LOC106576253	XM_014153319.1	C-type mannose receptor 2-like	1.65505	3.28234e-17	8.90364e-16
LOC106597149	LOC106597149	XM_014188374.1	caspase-14-like	1.65246	1.5961e-10	1.60439e-09
LOC106590517	LOC106590517	XM_014181604.1	uncharacterized serine-rich protein C215.13-like%2C transcript variant X1	1.65236	6.80299e-21	2.96465e-19
LOC106569327	LOC106569327	XM_014140565.1	aquaporin FA-CHIP-like	1.64998	7.29066e-22	3.55602e-20
LOC106589863	LOC106589863	XM_014180268.1	transmembrane protease serine 9-like	1.63715	6.86982e-31	9.29647e-29
LOC106566391	LOC106566391	XM_014134365.1	natterin-like protein	1.63529	9.37914e-14	1.54939e-12
LOC100194971	aqp1	NM_001140000.1	Aquaporin-1	1.63284	1.63582e-07	9.87144e-07
LOC106584829	map2k1	XM_014170426.1	mitogen-activated protein kinase kinase 1	1.62967	2.13334e-18	6.84418e-17
LOC106590667	LOC106590667	XM_014181821.1	uncharacterized LOC106590667	1.62345	5.04222e-18	1.53813e-16
LOC106565937	LOC106565937	XM_014133629.1	tumor necrosis factor receptor superfamily member 21-like%2C transcript variant X2	1.62235	4.73574e-12	6.02147e-11
LOC106602230	LOC106602230	XM_014194744.1	erythroblast NAD(P)(+)--arginine ADP-ribosyltransferase-like	1.6186	6.6672e-12	8.28418e-11
LOC106575441	LOC106575441	XR_001321777.1	arabinogalactan protein 1-like%2C transcript variant X2	1.61681	4.12418e-40	1.22689e-37
LOC106566405	LOC106566405	XM_014134392.1	uncharacterized LOC106566405	1.61479	0.000179174	0.000576109
LOC106578030	LOC106578030	XM_014156576.1	pentraxin fusion protein-like	1.61445	2.18634e-07	1.29121e-06
LOC106584297	LOC106584297	XM_014169376.1	collagen alpha-6(VI) chain-like%2C transcript variant X4	1.61139	8.06431e-26	6.02247e-24
LOC106561115	LOC106561115	XM_014124763.1	C-C motif chemokine 4-like	1.61045	1.22425e-27	1.15361e-25
LOC106564360	LOC106564360	XM_014130418.1	H-2 class II histocompatibility antigen%2C A-Q alpha chain-like	1.60985	3.1669e-38	8.20114e-36
LOC106575399	LOC106575399	XR_001321738.1	uncharacterized LOC106575399%2C transcript variant X1	1.60917	1.31959e-35	2.72989e-33
LOC106568147	LOC106568147	XM_014138222.1	dual specificity protein phosphatase 4-like	1.60745	2.32181e-07	1.36451e-06
LOC100196310	fcl	NM_001141339.1	GDP-L-fucose synthetase	1.60456	0.00422439	0.00968357
LOC106597704	LOC106597704	XM_014188862.1	endonuclease domain-containing 1 protein-like	1.6036	6.58036e-15	1.28164e-13
LOC106575840	LOC106575840	XM_014152536.1	OX-2 membrane glycoprotein-like	1.59918	1.82306e-19	6.58866e-18
LOC106602268	LOC106602268	XM_014194793.1	hydroperoxide isomerase ALOXE3-like	1.59835	9.90603e-11	1.02671e-09
LOC106587272	LOC106587272	XR_001324397.1	B-cadherin-like	1.59602	8.29945e-86	1.75733e-82
LOC106588714	LOC106588714	XM_014177991.1	adseverin-like	1.594	5.65652e-28	5.5269e-26
LOC106572584	LOC106572584	XM_014146897.1	transcription factor NF-E2 45 kDa subunit-like%2C transcript variant X2	1.59294	1.69919e-20	7.06282e-19
LOC106566760	LOC106566760	XR_001319936.1	uncharacterized LOC106566760	1.59053	2.34765e-23	1.33501e-21
LOC106564846	LOC106564846	XM_014131306.1	proactivator polypeptide-like	1.58998	7.05341e-13	1.02377e-11
LOC106598164	LOC106598164	XM_014189230.1	serine protease 27-like	1.5898	3.31581e-28	3.38119e-26
LOC106609055	LOC106609055	XM_014207419.1	ras-related protein Rab-38-like%2C transcript variant X3	1.58616	3.30904e-18	1.03937e-16
LOC106587254	dpep1	XM_014175488.1	dipeptidase 1 (renal)	1.58288	1.36426e-09	1.17007e-08
LOC106602519	LOC106602519	XM_014195198.1	oocyte zinc finger protein XlCOF6.1-like	1.58245	0.00150339	0.00386902
LOC106597035	LOC106597035	XM_014188273.1	latent-transforming growth factor beta-binding protein 1-like	1.58103	3.01589e-30	3.86335e-28
LOC106581089	LOC106581089	XM_014162803.1	uncharacterized LOC106581089	1.57585	7.6208e-41	2.44927e-38
LOC106581918	LOC106581918	XR_001323200.1	uncharacterized LOC106581918%2C transcript variant X1	1.57248	1.49993e-12	2.06389e-11
LOC106610449	LOC106610449	XM_014209828.1	C-type lectin domain family 4 member E-like	1.57183	4.98102e-10	4.60784e-09
LOC106588257	LOC106588257	NA	NA	1.56914	1.31059e-05	5.44255e-05
LOC106573849	LOC106573849	NA	NA	1.56841	4.05503e-42	1.50479e-39
LOC106609589	LOC106609589	NA	NA	1.56822	6.30395e-06	2.79282e-05
LOC106575633	LOC106575633	NA	NA	1.56684	3.51522e-06	1.64095e-05
LOC106588286	LOC106588286	XM_014177122.1	C-type lectin domain family 4 member E-like	1.56428	7.11528e-14	1.1946e-12
LOC106583235	LOC106583235	XR_001323466.1	cytochrome P450 1B1 pseudogene	1.55999	1.00461e-11	1.21962e-10
LOC106613975	LOC106613975	XM_014216863.1	ABC transporter G family member 20-like	1.55998	3.77024e-34	7.03179e-32
LOC106565579	LOC106565579	XM_014132857.1	uncharacterized LOC106565579	1.55943	1.53775e-13	2.46013e-12
LOC106577782	LOC106577782	XM_014156123.1	uncharacterized LOC106577782	1.54994	2.93957e-30	3.77903e-28
LOC106590232	LOC106590232	XM_014181022.1	uncharacterized LOC106590232	1.54947	1.25483e-37	3.09376e-35
LOC106583715	LOC106583715	XM_014168241.1	protein-glutamine gamma-glutamyltransferase 2-like	1.54867	6.53349e-05	0.000232667
LOC106573955	LOC106573955	NA	NA	1.54481	3.60218e-36	7.85843e-34
LOC106576487	LOC106576487	XM_014153691.1	ras-related protein Rab-3-like	1.54333	2.07901e-16	5.01247e-15
LOC106595290	LOC106595290	XR_001326363.1	uncharacterized LOC106595290%2C transcript variant X1	1.5428	2.48224e-07	1.4512e-06
LOC106609548	LOC106609548	NA	NA	1.54167	1.8341e-06	9.03767e-06
LOC106591367	LOC106591367	XM_014182592.1	ABC transporter G family member 23-like	1.53838	8.03358e-14	1.34501e-12
LOC106609425	LOC106609425	NA	NA	1.53817	5.69098e-05	0.000205716
LOC106609385	LOC106609385	NA	NA	1.53584	8.55702e-06	3.69327e-05
LOC106610035	LOC106610035	XM_014209151.1	uncharacterized LOC106610035%2C transcript variant X2	1.53238	6.66111e-17	1.73497e-15
LOC106602216	LOC106602216	XM_014194714.1	ubiquitin carboxyl-terminal hydrolase 37-like%2C transcript variant X2	1.53143	1.06601e-15	2.30601e-14
LOC100380594	peam3	NM_001173879.1	phosphoethanolamine N-methyltransferase 3	1.52279	3.98077e-30	5.01021e-28
LOC106610427	LOC106610427	XR_001329902.1	uncharacterized LOC106610427%2C transcript variant X1	1.52143	6.08618e-05	0.000218466
LOC106570903	LOC106570903	XM_014143478.1	granzyme A-like	1.52094	2.44456e-27	2.20537e-25
LOC106570457	tfpi2	XM_014142820.1	tissue factor pathway inhibitor 2%2C transcript variant X2	1.52092	1.58579e-17	4.54474e-16
LOC106613089	LOC106613089	XM_014214998.1	gap junction delta-2 protein-like	1.51879	9.3e-08	5.86069e-07
LOC106613519	ccdc181	XM_014215864.1	coiled-coil domain containing 181%2C transcript variant X3	1.51807	2.77176e-11	3.13848e-10
LOC106576485	LOC106576485	XR_001321949.1	uncharacterized LOC106576485	1.51719	0.000301293	0.000919332
LOC106564353	LOC106564353	XM_014130448.1	antimicrobial peptide NK-lysin-like	1.51429	2.90287e-09	2.3614e-08
LOC106574727	LOC106574727	XM_014150745.1	chloride intracellular channel protein 4-like%2C transcript variant X4	1.51387	2.22094e-26	1.78848e-24
LOC106563737	LOC106563737	XM_014129564.1	hepatocyte cell adhesion molecule-like	1.51362	6.81332e-33	1.10974e-30
LOC100136365	LOC100136365	XM_014145497.1	lysozyme C II%2C transcript variant X1	1.5131	1.60641e-28	1.68584e-26
LOC106597730	LOC106597730	XM_014188878.1	latent-transforming growth factor beta-binding protein 4-like	1.50873	8.3615e-17	2.1468e-15
LOC106612682	LOC106612682	XM_014214087.1	cytochrome c oxidase subunit 7A2%2C mitochondrial-like	1.50789	1.75832e-22	9.21289e-21
LOC100270811	ncf2	NM_001145423.1	neutrophil cytosolic factor 2	1.50621	2.53952e-39	6.9252e-37
LOC106600435	LOC106600435	XM_014191790.1	aquaporin FA-CHIP-like	1.50353	6.13785e-16	1.3757e-14
LOC106578310	LOC106578310	XM_014156997.1	IGF-like family receptor 1	1.50292	4.72943e-19	1.63066e-17
LOC106584280	LOC106584280	XM_014169346.1	transcription factor AP-1-like%2C transcript variant X1	1.50268	3.86109e-28	3.89311e-26
LOC106598092	LOC106598092	XM_014189168.1	protein-glutamine gamma-glutamyltransferase 2-like	1.50068	0.00035493	0.00106312
LOC106577474	LOC106577474	XM_014155483.1	G-protein coupled receptor 4-like	1.50014	6.18853e-25	4.16378e-23
LOC106583478	LOC106583478	XM_014167706.1	G0/G1 switch protein 2-like%2C transcript variant X1	1.4999	2.21468e-16	5.32173e-15
LOC106591443	LOC106591443	XM_014182665.1	parvalbumin alpha	1.49841	1.75873e-05	7.1068e-05
LOC106607840	LOC106607840	XM_014205257.1	uncharacterized LOC106607840%2C transcript variant X1	1.49622	1.44901e-13	2.32954e-12
LOC106600843	LOC106600843	XM_014192555.1	interleukin-17F-like	1.49614	2.34035e-09	1.93352e-08
LOC100195775	hce1	NM_001140804.1	High choriolytic enzyme 1	1.49204	1.11971e-20	4.7642e-19
LOC106592411	LOC106592411	XM_014183752.1	GTPase IMAP family member 4-like%2C transcript variant X1	1.49049	3.84636e-13	5.79304e-12
LOC100136589	LOC100136589	NM_001123677.1	metallothionein A	1.48684	1.82327e-24	1.1616e-22
LOC106579293	LOC106579293	XM_014159082.1	chondroadherin-like	1.48625	1.95689e-12	2.63722e-11
LOC106581246	LOC106581246	XR_001323052.1	uncharacterized LOC106581246	1.48543	7.84193e-11	8.25616e-10
LOC106581689	LOC106581689	XM_014163919.1	sialoadhesin-like	1.48308	6.87651e-09	5.25675e-08
LOC106578249	LOC106578249	XM_014156906.1	B-cell receptor CD22-like	1.48033	6.90593e-21	2.99501e-19
LOC100195947	rn138	NM_001140976.1	E3 ubiquitin-protein ligase RNF138	1.47671	3.11193e-25	2.19211e-23
LOC106564358	LOC106564358	XM_014130416.1	protein O-GlcNAcase-like	1.47496	3.9879e-51	2.70846e-48
LOC106613064	LOC106613064	XR_001330423.1	endothelin-converting enzyme-like 1%2C transcript variant X4	1.47429	1.53256e-09	1.30016e-08
LOC106573648	LOC106573648	XM_014148887.1	olfactomedin-4-like	1.47388	5.75981e-38	1.44986e-35
LOC100194663	LOC100194663	NM_001139747.1	myosin light chain 1-3	1.47043	1.05556e-05	4.47011e-05
LOC106587711	LOC106587711	XM_014176306.1	hepatoma-derived growth factor-related protein 3-like%2C transcript variant X1	1.46427	8.93966e-31	1.19625e-28
LOC106576555	LOC106576555	XM_014153779.1	EF-hand calcium-binding domain-containing protein 4B-like	1.46243	8.78614e-15	1.67602e-13
LOC106577212	LOC106577212	XR_001322079.1	uncharacterized LOC106577212%2C transcript variant X1	1.45682	2.0908e-19	7.50354e-18
LOC106574818	LOC106574818	XM_014150912.1	transmembrane protein 116-like%2C transcript variant X1	1.45535	2.2913e-26	1.83947e-24
LOC106569019	LOC106569019	XR_001320432.1	uncharacterized LOC106569019	1.4532	9.36291e-14	1.54813e-12
LOC106613755	LOC106613755	XM_014216331.1	complement factor D-like	1.45266	3.04521e-20	1.2166e-18
LOC106590759	LOC106590759	XM_014181918.1	caspase-14-like	1.44945	6.05106e-09	4.67612e-08
LOC100195999	cxl10	XM_014127947.1	C-X-C motif chemokine 10%2C transcript variant X1	1.44393	5.85899e-16	1.31895e-14
LOC106594704	LOC106594704	NA	NA	1.44362	3.51243e-09	2.82344e-08
LOC106571119	LOC106571119	XM_014143803.1	tumor necrosis factor alpha-induced protein 2-like%2C transcript variant X2	1.43907	8.14038e-18	2.4117e-16
LOC106570622	LOC106570622	XM_014143089.1	CD5 antigen-like%2C transcript variant X2	1.43832	0.000823421	0.00226414
LOC106567797	LOC106567797	XM_014137537.1	rho guanine nucleotide exchange factor 9-like%2C transcript variant X3	1.43792	4.93386e-29	5.39815e-27
LOC106605635	LOC106605635	XM_014201495.1	B-cell receptor CD22-like%2C transcript variant X1	1.43543	1.58267e-33	2.82028e-31
LOC106605612	LOC106605612	XM_014201447.1	C3a anaphylatoxin chemotactic receptor-like	1.43498	1.33935e-23	7.77603e-22
LOC106594036	LOC106594036	XM_014185405.1	transmembrane protein 116-like	1.4338	1.29752e-20	5.45932e-19
LOC106571057	LOC106571057	XM_014143715.1	interleukin-17F-like	1.43305	7.17322e-11	7.5988e-10
LOC106575629	LOC106575629	XM_014152239.1	intermediate filament protein ON3-like	1.43255	3.10102e-07	1.78029e-06
LOC106586879	LOC106586879	XM_014174605.1	mast cell protease 1A-like	1.43185	3.04223e-10	2.90627e-09
LOC100286623	clm7	NM_001146562.1	CMRF35-like molecule 7	1.43175	1.11271e-18	3.65449e-17
LOC106574478	LOC106574478	NA	NA	1.42675	0.00137654	0.00357734
LOC106607560	LOC106607560	XR_001329229.1	uncharacterized LOC106607560	1.42515	1.23705e-07	7.62483e-07
LOC100286721	pvrl1	NM_001146661.1	Poliovirus receptor-related protein 1	1.42231	4.68165e-24	2.86113e-22
LOC106598679	LOC106598679	XM_014189697.1	von Willebrand factor A domain-containing protein 5A-like	1.41739	0.000211631	0.000668175
LOC106577442	LOC106577442	XM_014155414.1	G-protein coupled receptor 4-like	1.41375	4.97133e-60	5.42267e-57
LOC100196008	graa	NM_001141037.1	Granzyme A	1.4108	2.85316e-20	1.14241e-18
LOC106590758	LOC106590758	XM_014181917.1	caspase-14-like	1.4107	1.38031e-19	5.08552e-18
LOC106583701	LOC106583701	XM_014168205.1	protein-glutamine gamma-glutamyltransferase 2-like	1.4071	4.48737e-05	0.000166044
LOC106576339	LOC106576339	NA	NA	1.40586	3.14276e-08	2.14377e-07
LOC106592207	LOC106592207	XM_014183525.1	zinc finger CW-type PWWP domain protein 1-like	1.40499	4.96223e-07	2.73367e-06
LOC106601824	LOC106601824	XM_014194222.1	parvalbumin%2C thymic CPV3-like	1.40345	6.074e-06	2.70293e-05
LOC106601079	LOC106601079	NA	NA	1.4007	5.01037e-12	6.34376e-11
LOC106590200	LOC106590200	XM_014180956.1	ADP-ribosyl cyclase/cyclic ADP-ribose hydrolase 1-like	1.40047	5.52163e-13	8.1491e-12
LOC106578317	LOC106578317	XM_014157015.1	uncharacterized LOC106578317%2C transcript variant X3	1.40024	1.88478e-26	1.53495e-24
LOC106592441	LOC106592441	XM_014183789.1	Fc receptor-like protein 5	1.3999	1.38057e-26	1.14505e-24
LOC106601071	LOC106601071	XM_014192977.1	hemoglobin subunit alpha-4	1.39804	1.66356e-14	3.0335e-13
LOC106575432	LOC106575432	NA	NA	1.39552	3.78567e-05	0.000142258
LOC106578435	LOC106578435	XM_014157203.1	E3 ubiquitin-protein ligase TRIM58-like%2C transcript variant X1	1.39517	6.19549e-18	1.86717e-16
LOC100194745	loxe3	NM_001139774.1	Epidermis-type lipoxygenase 3	1.39357	1.35512e-18	4.43042e-17
LOC106587283	LOC106587283	NA	NA	1.39312	2.24439e-17	6.26759e-16
LOC106605868	LOC106605868	XM_014201851.1	transmembrane protein 116-like	1.39291	4.69946e-23	2.59451e-21
LOC106605169	LOC106605169	XM_014200547.1	sialic acid-binding Ig-like lectin 5	1.39128	5.6657e-28	5.5269e-26
LOC106577746	LOC106577746	XM_014156065.1	uncharacterized LOC106577746	1.39108	2.16602e-09	1.79942e-08
LOC106579606	LOC106579606	XM_014159681.1	polymeric immunoglobulin receptor-like	1.39084	9.98439e-13	1.41719e-11
LOC106595660	LOC106595660	XM_014187025.1	interleukin-8-like	1.38875	1.27569e-12	1.77915e-11
LOC106568373	LOC106568373	XM_014138665.1	C3a anaphylatoxin chemotactic receptor-like	1.38519	9.69979e-30	1.16774e-27
LOC106605106	LOC106605106	XR_001328795.1	uncharacterized LOC106605106	1.38184	1.61944e-17	4.63383e-16
LOC106591776	LOC106591776	XM_014182985.1	endonuclease domain-containing 1 protein-like%2C transcript variant X1	1.37982	2.33898e-06	1.13073e-05
LOC106573339	LOC106573339	XR_001321320.1	uncharacterized LOC106573339	1.37793	2.57914e-17	7.12499e-16
LOC106568560	LOC106568560	XM_014139001.1	transcription factor AP-1-like%2C transcript variant X1	1.37676	5.70093e-13	8.39995e-12
LOC106604605	LOC106604605	XM_014199428.1	adhesion G protein-coupled receptor E3-like	1.37119	3.41914e-34	6.41018e-32
LOC106590030	LOC106590030	XM_014180523.1	heme oxygenase-like	1.36964	2.01637e-21	9.36533e-20
LOC106579322	LOC106579322	XM_014159140.1	uncharacterized LOC106579322	1.36907	1.79458e-06	8.85387e-06
LOC100380457	gpnmb	XM_014142929.1	glycoprotein (transmembrane) nmb%2C transcript variant X1	1.36857	3.32756e-07	1.90125e-06
LOC106597776	LOC106597776	XR_001326998.1	uncharacterized LOC106597776	1.36752	1.95763e-05	7.83486e-05
LOC106613332	LOC106613332	NM_001146582.1	Galectin-4	1.36701	2.96482e-13	4.54328e-12
LOC106577765	LOC106577765	XM_014156092.1	perforin-1-like	1.36638	8.39249e-19	2.79718e-17
LOC106588482	LOC106588482	XM_014177573.1	C-type lectin domain family 4 member E-like%2C transcript variant X2	1.3649	1.89825e-22	9.88848e-21
LOC106570980	LOC106570980	XM_014143595.1	high mobility group nucleosome-binding domain-containing protein 3-like%2C transcript variant X3	1.36454	6.98195e-08	4.49512e-07
LOC100195982	nar5	NM_001141011.1	Ecto-ADP-ribosyltransferase 5	1.3629	1.39096e-09	1.19099e-08
LOC106568909	LOC106568909	XM_014139716.1	retinoic acid receptor RXR-gamma-A-like%2C transcript variant X1	1.3616	6.199e-15	1.2114e-13
LOC106609427	LOC106609427	NA	NA	1.35914	6.27514e-05	0.000224488
LOC106595459	LOC106595459	XR_001326395.1	uncharacterized LOC106595459	1.35888	2.48663e-08	1.72331e-07
LOC106560573	plvap	XM_014123581.1	plasmalemma vesicle associated protein	1.35851	1.1729e-14	2.18981e-13
LOC106579692	LOC106579692	XM_014159827.1	probable polyketide synthase 1	1.35275	8.82921e-11	9.23616e-10
LOC106605186	LOC106605186	XM_014200567.1	free fatty acid receptor 2-like	1.35114	6.64325e-07	3.56911e-06
LOC106591530	LOC106591530	XM_014182751.1	endonuclease domain-containing 1 protein-like	1.34968	1.80886e-11	2.10785e-10
LOC106602482	LOC106602482	XR_001328218.1	uncharacterized LOC106602482	1.34725	8.44504e-14	1.40864e-12
LOC106611675	LOC106611675	XR_001330139.1	uncharacterized LOC106611675	1.34538	3.88686e-11	4.30762e-10
LOC100136916	cyp1a	NM_001123687.1	cytochrome P450 1A	1.34516	4.00076e-25	2.75884e-23
LOC106574265	LOC106574265	XM_014150051.1	H-2 class II histocompatibility antigen%2C A-Q alpha chain-like	1.34375	3.70194e-13	5.58253e-12
LOC106604643	LOC106604643	XM_014199486.1	CD97 antigen-like	1.34288	2.7056e-24	1.69375e-22
LOC106574712	LOC106574712	XR_001321575.1	uncharacterized LOC106574712	1.34268	2.30825e-07	1.3572e-06
LOC106591396	LOC106591396	XM_014182619.1	mitochondrial amidoxime-reducing component 1-like	1.34136	1.04127e-29	1.24524e-27
LOC106584149	LOC106584149	XM_014169068.1	regulator of G-protein signaling 21-like%2C transcript variant X2	1.3385	2.9118e-52	2.1836e-49
LOC100286697	cxb5	NM_001146638.1	Gap junction beta-5 protein	1.33783	4.61928e-07	2.56045e-06
LOC106590054	LOC106590054	XM_014180565.1	cadherin-10-like%2C transcript variant X3	1.33754	5.06569e-15	1.00355e-13
LOC106565178	LOC106565178	XM_014132022.1	interferon-induced protein 44-like	1.33676	2.73249e-12	3.60552e-11
LOC106583765	LOC106583765	XM_014168324.1	RING finger protein 208-like	1.33668	9.86462e-10	8.68608e-09
LOC106607816	LOC106607816	XM_014205188.1	clusterin-like	1.33586	3.17797e-48	1.84507e-45
LOC106588466	LOC106588466	XM_014177532.1	asialoglycoprotein receptor 1-like	1.33492	4.32331e-26	3.3467e-24
LOC106572191	LOC106572191	XM_014146135.1	angiopoietin-related protein 7-like	1.33481	3.00243e-38	7.83155e-36
LOC106593880	LOC106593880	XM_014185260.1	uncharacterized LOC106593880	1.33197	1.11791e-14	2.09804e-13
LOC106570900	LOC106570900	NM_001141037.1	Granzyme A	1.33062	6.47621e-16	1.44345e-14
LOC106573183	LOC106573183	XM_014147942.1	pyrin-like	1.33041	2.16246e-18	6.93143e-17
LOC106602902	LOC106602902	XM_014195888.1	E3 ubiquitin-protein ligase TRIM39-like	1.33003	5.91955e-08	3.86154e-07
LOC106590934	LOC106590934	XM_014182105.1	uncharacterized LOC106590934	1.32964	4.45297e-11	4.88985e-10
LOC106605545	LOC106605545	XM_014201331.1	xylose isomerase-like	1.32546	2.38046e-30	3.09339e-28
LOC106611614	LOC106611614	XM_014212004.1	gamma-aminobutyric acid receptor subunit alpha-4-like%2C transcript variant X3	1.32437	2.62686e-18	8.33098e-17
LOC106569484	LOC106569484	XM_014140875.1	GTPase IMAP family member 8-like%2C transcript variant X1	1.32122	8.48638e-07	4.4595e-06
LOC100195613	mb	NM_001140642.1	myoglobin	1.31964	9.85737e-08	6.18163e-07
LOC106601911	LOC106601911	XM_014194345.1	ketosamine-3-kinase-like	1.31934	4.15348e-21	1.85265e-19
LOC100196322	pdl1	NM_001141351.1	Programmed cell death 1 ligand 1	1.31806	4.35363e-22	2.17657e-20
LOC106588456	LOC106588456	XM_014177089.1	myelin associated glycoprotein%2C transcript variant X3	1.31718	5.04255e-17	1.33858e-15
LOC106562873	LOC106562873	NA	NA	1.31679	5.63748e-07	3.07558e-06
LOC106574080	LOC106574080	XM_014149621.1	claudin-1-like	1.31613	9.94752e-07	5.16101e-06
LOC106581833	LOC106581833	XM_014164236.1	protein FEV	1.31534	3.21823e-20	1.27863e-18
LOC106566508	LOC106566508	XM_014134598.1	extracellular matrix protein 2-like%2C transcript variant X2	1.31364	3.50464e-09	2.8178e-08
LOC100136457	tnf-alpha-1	NM_001123589.1	tumor necrosis factor alpha-1 precursor	1.3098	3.90837e-16	9.02989e-15
LOC100534606	LOC100534606	XM_014138740.1	SCARB1-like protein 2%2C transcript variant X2	1.30968	5.41015e-16	1.22173e-14
LOC106583433	LOC106583433	XM_014167591.1	interferon-induced protein 44-like%2C transcript variant X3	1.30894	2.26214e-13	3.52808e-12
LOC106608845	LOC106608845	XR_001329595.1	uncharacterized LOC106608845	1.30828	2.285e-09	1.89169e-08
LOC106574108	LOC106574108	XM_014149696.1	endonuclease domain-containing 1 protein-like	1.30789	2.54419e-10	2.46915e-09
LOC106581982	LOC106581982	XM_014164593.1	UDP-glucuronic acid decarboxylase 1-like%2C transcript variant X3	1.30725	2.58022e-05	0.000100735
LOC106601420	LOC106601420	XM_014193640.1	prostasin-like%2C transcript variant X2	1.30645	8.62093e-09	6.45557e-08
LOC106608842	LOC106608842	NA	NA	1.30638	3.01612e-13	4.61796e-12
LOC106574241	LOC106574241	XM_014149971.1	desmin-like	1.30452	4.05415e-14	7.05673e-13
LOC106567039	LOC106567039	XM_014135858.1	glycoprotein-N-acetylgalactosamine 3-beta-galactosyltransferase 1-B-like%2C transcript variant X2	1.30449	0.000202371	0.000642375
LOC106590528	LOC106590528	XM_014181631.1	uncharacterized LOC106590528	1.30365	6.36195e-08	4.13292e-07
LOC106613963	LOC106613963	XM_014216828.1	transcription factor AP-1-like	1.3019	4.05437e-16	9.33725e-15
LOC106585833	LOC106585833	XM_014172504.1	histone H1-like	1.30098	5.08781e-12	6.43051e-11
LOC106601076	LOC106601076	XM_014192981.1	hemoglobin subunit alpha-4	1.30057	1.3195e-13	2.1319e-12
LOC106610332	LOC106610332	XM_014209628.1	hydroperoxide isomerase ALOXE3-like	1.29897	3.01161e-06	1.42545e-05
LOC100195681	il8	NM_001140710.2	interleukin 8	1.29761	1.34716e-14	2.49831e-13
LOC106561458	LOC106561458	XM_014125446.1	programmed cell death 1 ligand 1-like%2C transcript variant X1	1.29712	3.51462e-20	1.39024e-18
LOC100195836	ccl25	NM_001140865.1	C-C motif chemokine 25	1.29696	1.78048e-17	5.0584e-16
LOC106584833	lctl	XM_014170429.1	lactase-like	1.29557	0.000564852	0.00161317
LOC106609985	LOC106609985	XR_001329815.1	uncharacterized LOC106609985%2C transcript variant X2	1.29465	6.31341e-16	1.41066e-14
LOC100195724	sh21a	NM_001140753.1	SH2 domain-containing protein 1A	1.29265	9.76622e-16	2.12029e-14
LOC106595276	LOC106595276	XM_014186650.1	zymogen granule membrane protein 16-like%2C transcript variant X2	1.29184	9.2714e-07	4.83601e-06
LOC106590088	LOC106590088	XM_014180637.1	cytochrome b5	1.2913	2.48605e-33	4.36526e-31
LOC106583595	LOC106583595	XR_001323566.1	uncharacterized LOC106583595	1.29099	2.28479e-08	1.59201e-07
LOC106602760	LOC106602760	XM_014195601.1	C-type lectin domain family 4 member E-like	1.28983	1.11894e-06	5.75142e-06
LOC106602166	LOC106602166	XM_014194638.1	CD209 antigen-like	1.28776	9.67553e-36	2.02489e-33
LOC106608399	LOC106608399	XM_014206308.1	eomesodermin-like	1.28756	4.60004e-09	3.62326e-08
LOC100196312	m4a4a	NM_001141341.1	Membrane-spanning 4-domains subfamily A member 4A	1.28597	1.88786e-12	2.54896e-11
LOC106580765	LOC106580765	XM_014162154.1	calcineurin B homologous protein 2-like%2C transcript variant X2	1.28496	2.12874e-12	2.85386e-11
LOC100136439	LOC100136439	NM_001123573.1	cathelicidin antimicrobial peptide	1.28454	7.7824e-07	4.12388e-06
LOC106605185	LOC106605185	XM_014200566.1	free fatty acid receptor 2-like	1.2834	1.26899e-21	6.01825e-20
LOC106585882	LOC106585882	XM_014172601.1	C-C motif chemokine 4-like	1.28319	1.37219e-10	1.39254e-09
LOC106586600	LOC106586600	XM_014174054.1	3 beta-hydroxysteroid dehydrogenase/Delta 5-->4-isomerase-like	1.28309	1.73202e-15	3.62055e-14
LOC106573887	LOC106573887	NA	NA	1.28148	0.00314296	0.00744106
LOC100136500	LOC100136500	XM_014186134.1	diacylglycerol O-acyltransferase 1	1.2809	3.6258e-21	1.62939e-19
LOC106597309	LOC106597309	XM_014188516.1	eomesodermin-like	1.28085	2.38263e-09	1.96574e-08
LOC106574597	LOC106574597	XM_014150573.1	traf2 and NCK-interacting protein kinase-like	1.28023	1.47602e-05	6.06031e-05
LOC106576803	LOC106576803	XM_014154233.1	cytochrome P450 1B1-like	1.28014	6.72245e-16	1.49463e-14
LOC106594192	LOC106594192	XM_014185570.1	uncharacterized LOC106594192	1.27982	2.15433e-07	1.27419e-06
LOC106592911	LOC106592911	XR_001325742.1	uncharacterized LOC106592911	1.27928	1.85239e-09	1.55319e-08
LOC100136926	cyp1a	NM_001123694.1	cytochrome P450 1A	1.2788	6.22271e-16	1.39299e-14
LOC106578010	LOC106578010	XM_014156530.1	uncharacterized LOC106578010%2C transcript variant X1	1.27776	2.50168e-40	7.63141e-38
LOC106573599	LOC106573599	XM_014148780.1	duodenase-1-like%2C transcript variant X2	1.27744	4.4441e-07	2.47363e-06
LOC106600167	LOC106600167	XM_014191496.1	hemagglutinin/amebocyte aggregation factor-like	1.27649	2.21876e-12	2.96241e-11
LOC106566390	LOC106566390	NA	NA	1.27635	5.07414e-13	7.54124e-12
LOC106607266	LOC106607266	XM_014204064.1	integrin beta-3-like%2C transcript variant X2	1.27612	1.31624e-25	9.61041e-24
LOC106563251	LOC106563251	XM_014128668.1	histone-lysine N-methyltransferase Smyd1-like	1.27604	1.67535e-07	1.00896e-06
LOC106569355	LOC106569355	XM_014140652.1	protein CYR61-like	1.27474	4.12917e-06	1.9019e-05
LOC100196475	ocad2	NM_001141504.1	OCIA domain-containing protein 2	1.27455	1.98399e-21	9.23878e-20
LOC106597302	LOC106597302	NA	NA	1.2744	3.52015e-05	0.00013324
LOC106568052	LOC106568052	XR_001320221.1	uncharacterized LOC106568052	1.27349	1.52815e-15	3.23193e-14
LOC106585027	LOC106585027	XM_014170768.1	ras-related protein Rab-3C-like%2C transcript variant X2	1.27147	1.83064e-12	2.47635e-11
LOC106608737	LOC106608737	XM_014206842.1	uncharacterized LOC106608737	1.26968	5.91349e-09	4.57648e-08
LOC106584755	LOC106584755	XM_014170301.1	zymogen granule membrane protein 16-like%2C transcript variant X2	1.26822	2.63536e-08	1.81729e-07
LOC106603213	kcnk10	XM_014196579.1	potassium channel%2C two pore domain subfamily K%2C member 10%2C transcript variant X2	1.26816	2.0017e-08	1.40922e-07
LOC106604170	LOC106604170	XM_014198590.1	uncharacterized LOC106604170	1.26786	8.01805e-10	7.16641e-09
LOC100196096	ccl8	NM_001141125.2	C-C motif chemokine 8	1.26667	4.34326e-09	3.43831e-08
LOC106569000	LOC106569000	XM_014139934.1	proteoglycan 4-like	1.26595	1.24379e-12	1.73735e-11
LOC106569175	LOC106569175	XM_014140233.1	proteasome subunit alpha type-7-like	1.26481	1.12522e-15	2.42826e-14
LOC106597391	LOC106597391	NA	NA	1.26462	3.77251e-05	0.000141837
LOC106613936	LOC106613936	XM_014216776.1	lysosome-associated membrane glycoprotein 3-like	1.26273	2.02541e-16	4.89307e-15
LOC100196275	haaf	NM_001141304.1	Hemagglutinin/amebocyte aggregation factor	1.26166	7.66378e-14	1.28489e-12
LOC106564722	LOC106564722	XM_014131008.1	uncharacterized LOC106564722	1.26052	2.00388e-06	9.8192e-06
LOC106607078	LOC106607078	XM_014203669.1	ral guanine nucleotide dissociation stimulator-like 1%2C transcript variant X2	1.25977	3.12297e-15	6.35109e-14
LOC100195485	abhd12	NM_001140514.1	abhydrolase domain containing 12	1.25875	2.00144e-34	3.77193e-32
LOC106612260	LOC106612260	XR_001330262.1	uncharacterized LOC106612260	1.25868	2.20496e-11	2.54064e-10
LOC106600064	LOC106600064	XM_014191403.1	low affinity immunoglobulin gamma Fc region receptor II-b-like	1.25718	0.000145126	0.000475856
LOC106567570	LOC106567570	XM_014137042.1	HLA class II histocompatibility antigen%2C DQ beta 1 chain-like	1.25651	2.22784e-06	1.08253e-05
LOC106575519	LOC106575519	XR_001321793.1	uncharacterized LOC106575519	1.25638	7.23373e-07	3.85677e-06
LOC106570815	LOC106570815	XM_014143360.1	interleukin-1 beta-like	1.25498	5.41578e-05	0.000196578
LOC106593851	LOC106593851	XM_014185237.1	C-C motif chemokine 13-like	1.25477	1.01575e-05	4.31828e-05
LOC106576186	LOC106576186	XM_014153165.1	hemagglutinin/amebocyte aggregation factor-like	1.25375	8.74505e-13	1.25114e-11
LOC106560332	LOC106560332	XM_014123143.1	pre-B-cell leukemia transcription factor 1%2C transcript variant X4	1.25227	3.67316e-18	1.14774e-16
LOC106589054	LOC106589054	NA	NA	1.25137	3.38015e-13	5.136e-12
LOC106597047	LOC106597047	XM_014188285.1	uncharacterized LOC106597047	1.24972	7.09043e-13	1.02831e-11
LOC106582240	LOC106582240	XM_014165110.1	interferon-induced guanylate-binding protein 1-like	1.24938	2.08547e-15	4.32673e-14
LOC106610314	LOC106610314	XM_014209598.1	hydroperoxide isomerase ALOXE3-like	1.24932	3.49876e-05	0.00013257
LOC106570689	LOC106570689	XM_014143162.1	MARCKS-related protein-like	1.24916	1.68051e-18	5.44971e-17
LOC100136479	LOC100136479	XM_014200890.1	CD83 antigen%2C transcript variant X3	1.24898	7.17083e-26	5.40003e-24
LOC106597249	LOC106597249	NA	NA	1.2483	3.51969e-05	0.000133237
LOC106585568	LOC106585568	XM_014171938.1	leucine-rich repeat transmembrane neuronal protein 4-like	1.24796	3.89483e-15	7.85426e-14
LOC100380477	ccr3	NM_001173762.1	C-C chemokine receptor type 3	1.24711	3.67848e-20	1.44869e-18
LOC106562920	LOC106562920	NA	NA	1.2471	9.23953e-07	4.82009e-06
LOC106564621	LOC106564621	NA	NA	1.24601	3.42365e-25	2.39016e-23
LOC106566259	LOC106566259	XM_014134163.1	adenosine receptor A2a-like%2C transcript variant X3	1.24552	7.87773e-09	5.9448e-08
LOC106595512	LOC106595512	XM_014186881.1	TRAF2 and NCK-interacting protein kinase-like	1.24521	2.5691e-06	1.23303e-05
LOC106581914	LOC106581914	XM_014164374.1	rho GTPase-activating protein 6-like%2C transcript variant X1	1.24483	1.13762e-05	4.79167e-05
LOC106610430	LOC106610430	XR_001329906.1	uncharacterized LOC106610430	1.24456	0.000977296	0.00263551
LOC106605908	LOC106605908	XM_014201905.1	B-cell receptor CD22-like	1.24322	2.33896e-10	2.28538e-09
LOC100136420	LOC100136420	XM_014200130.1	lysozyme g%2C transcript variant X1	1.24269	2.7493e-28	2.81948e-26
LOC106611397	LOC106611397	XM_014211567.1	uncharacterized LOC106611397	1.24226	0.00010793	0.000365375
LOC106612812	LOC106612812	XM_014214328.1	P2X purinoceptor 5-like	1.24157	1.0387e-25	7.63039e-24
LOC106612509	LOC106612509	XM_014213691.1	transcobalamin-1-like	1.24041	2.54039e-08	1.75752e-07
LOC106599916	LOC106599916	NA	NA	1.23795	0.000701613	0.00195883
LOC106562434	LOC106562434	XM_014127322.1	electron transfer flavoprotein subunit alpha%2C mitochondrial-like	1.23715	7.10244e-07	3.79444e-06
LOC106562884	LOC106562884	XM_014127955.1	immediate early response gene 5-like protein	1.23493	2.11196e-18	6.78164e-17
LOC106568858	LOC106568858	XM_014139592.1	integral membrane protein 2C-like	1.23199	1.26443e-28	1.34261e-26
LOC106565158	LOC106565158	XM_014131965.1	ninjurin-1-like	1.2319	3.38322e-30	4.28811e-28
LOC106579319	tbkbp1	XM_014159134.1	TBK1 binding protein 1%2C transcript variant X1	1.23172	4.13033e-12	5.30794e-11
LOC106592169	LOC106592169	XM_014183478.1	gastrula zinc finger protein XlCGF52.1-like	1.23101	7.25578e-24	4.33133e-22
LOC106592723	LOC106592723	XM_014184046.1	probable glycoprotein hormone G-protein coupled receptor	1.23056	1.31052e-09	1.12666e-08
LOC106612113	cxxc5	XM_014212997.1	CXXC finger protein 5%2C transcript variant X3	1.23008	6.56709e-33	1.0794e-30
LOC100196515	lpxn	NM_001141544.1	Leupaxin	1.22936	8.04197e-33	1.28657e-30
LOC106589080	LOC106589080	XM_014178757.1	gap junction beta-3 protein-like	1.2292	7.09173e-17	1.84446e-15
LOC106587215	LOC106587215	XM_014175390.1	trans-1%2C2-dihydrobenzene-1%2C2-diol dehydrogenase-like	1.22562	8.20968e-24	4.87748e-22
LOC100196438	tba1a	NM_001141467.1	Tubulin alpha-1A chain	1.22555	9.20921e-44	4.04262e-41
LOC106582617	LOC106582617	XM_014165843.1	adenosine receptor A1-like	1.22548	1.22274e-08	8.92049e-08
LOC106603177	LOC106603177	XM_014196497.1	thiosulfate sulfurtransferase/rhodanese-like domain-containing protein 1	1.2243	4.15675e-05	0.000154861
LOC106563338	LOC106563338	XM_014128854.1	E3 ubiquitin-protein ligase NEURL3-like	1.22428	3.4714e-07	1.97779e-06
LOC100196501	itl1a	NM_001141530.2	Intelectin-1a	1.2214	2.0415e-06	9.9845e-06
LOC106587939	LOC106587939	XM_014176599.1	C-C motif chemokine 13-like	1.22053	1.15319e-05	4.8533e-05
LOC106575537	LOC106575537	NA	NA	1.21867	1.75057e-28	1.83179e-26
LOC106569423	LOC106569423	XM_014140771.1	high affinity immunoglobulin epsilon receptor subunit gamma-like%2C transcript variant X3	1.21827	1.99287e-20	8.17961e-19
LOC106605842	LOC106605842	XR_001328949.1	uncharacterized LOC106605842	1.2166	4.90425e-09	3.84437e-08
LOC106577510	LOC106577510	XM_014155599.1	acidic mammalian chitinase-like	1.21593	1.47998e-26	1.22187e-24
LOC106583575	LOC106583575	XM_014167942.1	galanin receptor type 1-like	1.21489	6.54097e-05	0.00023291
LOC106605369	LOC106605369	XM_014200905.1	uncharacterized LOC106605369%2C transcript variant X1	1.21473	3.18087e-06	1.49828e-05
LOC106610439	LOC106610439	NA	NA	1.21339	0.000944529	0.00255576
LOC106580573	LOC106580573	XM_014161776.1	gamma-glutamyl hydrolase-like	1.21235	7.62701e-15	1.47207e-13
LOC106600772	LOC106600772	XM_014192386.1	GRB2-related adapter protein-like	1.21215	1.91514e-15	3.98712e-14
LOC106609541	LOC106609541	NA	NA	1.21053	0.000107003	0.000362715
LOC106565227	LOC106565227	XM_014132106.1	uncharacterized LOC106565227	1.20937	2.88111e-12	3.79329e-11
LOC106574711	LOC106574711	XM_014150725.1	traf2 and NCK-interacting protein kinase-like	1.20906	4.35553e-08	2.90821e-07
LOC106608813	LOC106608813	XM_014206974.1	endonuclease domain-containing 1 protein-like%2C transcript variant X2	1.20773	9.4487e-07	4.92065e-06
LOC106574371	LOC106574371	XM_014150227.1	phospholipase A2 inhibitor 31 kDa subunit-like%2C transcript variant X2	1.20636	9.00511e-08	5.6938e-07
LOC106597323	LOC106597323	XM_014188528.1	phthiocerol synthesis polyketide synthase type I PpsA-like	1.20525	1.73959e-08	1.23507e-07
LOC106586910	LOC106586910	XM_014174651.1	zinc finger CCCH domain-containing protein 15-like%2C transcript variant X2	1.20459	3.41783e-33	5.91481e-31
LOC106574801	LOC106574801	XM_014150881.1	OX-2 membrane glycoprotein-like%2C transcript variant X1	1.20261	5.94237e-30	7.35057e-28
LOC106590650	LOC106590650	XM_014181789.1	immediate early response gene 2 protein-like	1.20227	3.30807e-05	0.000126034
LOC106591620	LOC106591620	XR_001325436.1	uncharacterized LOC106591620	1.19942	5.0673e-12	6.41134e-11
LOC106575168	LOC106575168	XM_014151435.1	desmin-like	1.19939	6.05317e-15	1.18741e-13
LOC106612333	LOC106612333	XM_014213381.1	phytanoyl-CoA dioxygenase domain-containing protein 1-like%2C transcript variant X1	1.19862	2.2424e-10	2.19879e-09
LOC106604896	LOC106604896	XM_014200011.1	uncharacterized LOC106604896	1.1968	3.9851e-15	8.02729e-14
LOC106577720	LOC106577720	XM_014156045.1	sulfotransferase family cytosolic 2B member 1-like%2C transcript variant X1	1.19475	4.64708e-20	1.79867e-18
LOC106578048	LOC106578048	XM_014156612.1	ras-related protein Rab-38-like	1.19418	1.12163e-08	8.23459e-08
LOC100270808	il1r2	NM_001145420.1	interleukin-1 receptor type II	1.19355	1.26489e-16	3.15968e-15
LOC106568066	LOC106568066	XM_014138069.1	centromere protein V-like	1.19302	0.00314596	0.00744769
LOC106586975	cssa26h9orf9	XM_014174763.1	chromosome ssa26 open reading frame%2C human C9orf9	1.19177	9.36513e-05	0.000321544
LOC106599956	LOC106599956	XM_014191289.1	hemagglutinin/amebocyte aggregation factor-like	1.19035	2.65028e-07	1.54193e-06
LOC106589058	LOC106589058	XM_014178730.1	tumor necrosis factor-like	1.18977	1.35306e-14	2.50797e-13
LOC106608914	LOC106608914	XM_014207124.1	natural killer cell receptor 2B4-like	1.18782	9.1702e-10	8.11831e-09
LOC106603186	LOC106603186	NA	NA	1.18679	8.94781e-15	1.70415e-13
LOC106611880	LOC106611880	XM_014212514.1	uncharacterized LOC106611880	1.18426	1.48874e-15	3.156e-14
LOC106587045	LOC106587045	XM_014174917.1	leukemia inhibitory factor receptor-like%2C transcript variant X4	1.18369	2.01351e-16	4.86758e-15
LOC106561647	LOC106561647	XM_014125804.1	troponin T%2C cardiac muscle isoforms-like	1.18315	3.07084e-09	2.49072e-08
LOC100286404	klf2	NM_001146353.1	Krueppel-like factor 2	1.18271	6.03666e-21	2.64672e-19
LOC106577784	LOC106577784	XM_014156126.1	titin-like%2C transcript variant X2	1.18198	1.06147e-07	6.61395e-07
LOC106566378	LOC106566378	XM_014134340.1	uncharacterized LOC106566378	1.18002	0.000516624	0.0014895
LOC106609693	LOC106609693	XM_014208694.1	crustapain-like	1.17967	2.11223e-13	3.31438e-12
LOC106567762	LOC106567762	XR_001320151.1	uncharacterized LOC106567762	1.17935	5.02938e-10	4.64556e-09
LOC106599075	LOC106599075	XM_014190135.1	hemagglutinin/amebocyte aggregation factor-like	1.17913	6.17897e-12	7.72017e-11
LOC100196581	batf3	NM_001141610.1	basic leucine zipper transcription factor%2C ATF-like 3	1.17881	6.6993e-09	5.13846e-08
LOC106561363	LOC106561363	XM_014125237.1	probable polypeptide N-acetylgalactosaminyltransferase 8%2C transcript variant X2	1.17859	1.91295e-27	1.74768e-25
LOC106562071	LOC106562071	XR_001318968.1	uncharacterized LOC106562071	1.17838	0.000171866	0.000554892
LOC106567480	LOC106567480	XM_014136751.1	T-cell immunoglobulin and mucin domain-containing protein 4-like	1.1758	1.63578e-07	9.87144e-07
LOC106601731	LOC106601731	XM_014194077.1	immunoglobulin superfamily member 6-like	1.1735	1.98696e-31	2.8724e-29
LOC100380370	abcg2	NM_001173655.1	ATP-binding cassette%2C sub-family G (WHITE)%2C member 2 (Junior blood group)	1.17147	8.89596e-11	9.29455e-10
LOC106571918	LOC106571918	XM_014145477.1	cadherin-13-like	1.16996	3.16035e-16	7.41107e-15
LOC106607151	LOC106607151	XM_014203786.1	interferon-induced very large GTPase 1-like	1.16853	4.43834e-08	2.95912e-07
LOC106609553	LOC106609553	NA	NA	1.16796	6.62174e-05	0.000235321
LOC106607565	LOC106607565	XM_014204620.1	rho-related GTP-binding protein RhoB-like	1.16643	1.36355e-41	4.71946e-39
LOC106560810	LOC106560810	XM_014124135.1	aminopeptidase N-like	1.16548	1.03181e-14	1.94456e-13
LOC106592051	LOC106592051	XM_014183353.1	NEDD4-binding protein 2-like 1	1.16418	0.000153286	0.000499879
LOC106573954	LOC106573954	XM_014149435.1	uncharacterized LOC106573954	1.16397	1.25826e-07	7.74974e-07
LOC106571500	ankrd55	XM_014144666.1	ankyrin repeat domain 55	1.16357	1.59814e-13	2.55107e-12
LOC106602219	LOC106602219	XM_014194732.1	ecto-ADP-ribosyltransferase 5-like%2C transcript variant X2	1.16355	2.55543e-08	1.76691e-07
LOC106577846	LOC106577846	XM_014156233.1	nuclear GTPase SLIP-GC-like	1.16223	5.2166e-06	2.35457e-05
LOC106592854	LOC106592854	XM_014184203.1	traf2 and NCK-interacting protein kinase-like	1.1622	0.00315555	0.00746694
LOC106576386	LOC106576386	XR_001321934.1	uncharacterized LOC106576386	1.15961	1.90153e-06	9.34945e-06
LOC106573907	LOC106573907	XM_014149358.1	transcription factor jun-D-like	1.15846	2.30386e-13	3.58847e-12
LOC106606797	LOC106606797	XR_001329125.1	uncharacterized LOC106606797	1.1579	0.000940018	0.00254512
LOC106601033	LOC106601033	XM_014192901.1	complement C1q-like protein 2	1.15645	4.2681e-05	0.000158615
LOC106567642	LOC106567642	XM_014137174.1	cytotoxic and regulatory T-cell molecule-like%2C transcript variant X2	1.15611	2.11426e-29	2.39323e-27
LOC106596635	LOC106596635	XM_014187904.1	OX-2 membrane glycoprotein-like%2C transcript variant X1	1.1558	3.57877e-25	2.4869e-23
LOC106574663	LOC106574663	XM_014150658.1	adhesion G-protein coupled receptor G7-like	1.15564	1.5912e-13	2.54112e-12
LOC106582790	LOC106582790	XM_014166215.1	uncharacterized LOC106582790	1.15534	1.15696e-10	1.18785e-09
LOC106610446	LOC106610446	XR_001329911.1	C-type lectin domain family 4 member E-like%2C transcript variant X6	1.15496	1.01644e-07	6.35754e-07
LOC106565524	LOC106565524	NA	NA	1.15495	9.8173e-21	4.20695e-19
LOC106570155	LOC106570155	XM_014142185.1	leukotriene B4 receptor 1-like	1.15457	2.09423e-13	3.28757e-12
LOC106597775	LOC106597775	XM_014188915.1	protein-glutamine gamma-glutamyltransferase 2-like	1.15339	0.00164682	0.00419495
LOC106564465	LOC106564465	XM_014130575.1	C3a anaphylatoxin chemotactic receptor-like	1.15157	2.3153e-21	1.06575e-19
LOC106605611	LOC106605611	XM_014201445.1	uncharacterized LOC106605611%2C transcript variant X1	1.1505	6.25106e-10	5.68646e-09
LOC106579398	LOC106579398	XM_014159249.1	double C2-like domain-containing protein alpha%2C transcript variant X4	1.15022	5.78578e-13	8.50408e-12
LOC106570833	LOC106570833	XM_014143392.1	titin-like%2C transcript variant X2	1.14922	1.08482e-10	1.11856e-09
LOC106563412	sepw1	XM_014128961.1	selenoprotein W%2C 1%2C transcript variant X2	1.14882	4.44364e-23	2.46082e-21
LOC106576285	LOC106576285	XM_014153376.1	achaete-scute homolog 1a	1.14871	4.04434e-10	3.78917e-09
LOC106599427	LOC106599427	XM_014190655.1	suppressor of cytokine signaling 1-like	1.14709	8.09864e-20	3.04617e-18
LOC100195092	ier2	NM_001140121.1	immediate early response 2	1.1461	0.000424796	0.00124967
LOC106579696	LOC106579696	XM_014159829.1	putative inactive phenolphthiocerol synthesis polyketide synthase type I Pks15%2C transcript variant X1	1.14466	6.50012e-08	4.21128e-07
LOC106579497	LOC106579497	XM_014159442.1	SH2 domain-containing protein 1B-like	1.14215	1.09982e-17	3.21602e-16
LOC106607527	LOC106607527	XM_014204562.1	serine protease HTRA1A-like	1.14163	7.78543e-37	1.7737e-34
LOC106602581	LOC106602581	XM_014195290.1	lectin-like	1.14096	7.75466e-11	8.17624e-10
LOC106570011	LOC106570011	XM_014141869.1	sialoadhesin-like%2C transcript variant X3	1.14067	1.06436e-13	1.74386e-12
LOC106598707	LOC106598707	NA	NA	1.14047	0.000558613	0.00159763
LOC100526824	tbx21	NM_001199226.1	T-box 21	1.1402	1.16712e-20	4.94835e-19
LOC106562131	LOC106562131	NA	NA	1.1398	1.44032e-08	1.03691e-07
LOC106574583	LOC106574583	NA	NA	1.13972	0.000561375	0.00160426
LOC106608972	LOC106608972	XM_014207251.1	TOX high mobility group box family member 4-B-like%2C transcript variant X2	1.13959	6.67985e-26	5.04084e-24
LOC106601051	LOC106601051	XM_014192952.1	hemoglobin subunit beta-like	1.13935	2.0178e-10	1.99103e-09
LOC106575639	LOC106575639	XM_014152251.1	keratin%2C type I cytoskeletal 18-like%2C transcript variant X2	1.13646	0.000107263	0.000363428
LOC106590243	LOC106590243	XM_014181042.1	CCAAT/enhancer-binding protein epsilon-like%2C transcript variant X1	1.13545	1.73784e-14	3.15935e-13
LOC106580712	LOC106580712	XM_014162043.1	neutrophil cytosol factor 2-like%2C transcript variant X2	1.13545	6.68677e-08	4.32286e-07
LOC106560797	LOC106560797	XM_014124116.1	cathepsin L1-like	1.13442	4.55752e-14	7.87201e-13
LOC106583714	LOC106583714	XM_014168240.1	protein-glutamine gamma-glutamyltransferase 2-like	1.13321	0.00026211	0.000810281
LOC106591477	LOC106591477	XM_014182706.1	protein O-GlcNAcase-like	1.13106	1.43371e-35	2.94902e-33
LOC106607375	LOC106607375	XM_014204293.1	hemoglobin subunit alpha-4	1.13093	5.01412e-07	2.75892e-06
LOC100526765	LOC100526765	XM_014216011.1	vascular cell adhesion molecule-like protein	1.1308	1.75936e-09	1.4814e-08
LOC106609625	LOC106609625	XR_001329729.1	ras and EF-hand domain-containing protein homolog%2C transcript variant X2	1.1298	6.27053e-21	2.73925e-19
LOC106561105	LOC106561105	XM_014124754.1	purine nucleoside phosphorylase-like%2C transcript variant X1	1.12837	3.85541e-09	3.0792e-08
LOC106591586	LOC106591586	XM_014182799.1	butyrophilin subfamily 1 member A1-like	1.12741	3.09508e-27	2.77141e-25
LOC100136576	LOC100136576	NM_001123666.1	beta globin	1.12667	5.66736e-11	6.10968e-10
LOC106592740	LOC106592740	XM_014184067.1	uncharacterized LOC106592740	1.12652	1.82769e-10	1.81538e-09
LOC106592270	LOC106592270	XM_014183593.1	hepatoma-derived growth factor-related protein 3-like	1.12586	1.10323e-10	1.13625e-09
LOC106604396	LOC106604396	XM_014198974.1	N-acetyllactosaminide beta-1%2C3-N-acetylglucosaminyltransferase 2-like	1.12569	1.30534e-12	1.81557e-11
LOC106590763	LOC106590763	XM_014181922.1	CMRF35-like molecule 1	1.12514	4.69112e-07	2.59587e-06
LOC106610428	LOC106610428	XR_001329904.1	uncharacterized LOC106610428	1.12459	1.04438e-05	4.4285e-05
LOC106572772	LOC106572772	XR_001321188.1	uncharacterized LOC106572772	1.12352	3.20461e-12	4.18705e-11
LOC100196454	iigp1	NM_001141483.2	Interferon-inducible GTPase 1	1.12347	0.000504305	0.00145737
LOC106565402	LOC106565402	XM_014132489.1	acyl-coenzyme A thioesterase 1-like%2C transcript variant X6	1.12273	7.1049e-19	2.40033e-17
LOC106609242	LOC106609242	XM_014207803.1	transcription factor EC-like%2C transcript variant X8	1.12121	3.87205e-22	1.94935e-20
LOC106606076	LOC106606076	XM_014202175.1	uncharacterized LOC106606076%2C transcript variant X3	1.1205	3.13593e-17	8.56455e-16
LOC106587482	LOC106587482	XM_014175905.1	myosin-binding protein C%2C cardiac-type-like%2C transcript variant X7	1.12033	8.41854e-05	0.000291912
LOC106597757	LOC106597757	NA	NA	1.11996	0.0016745	0.00425596
LOC106614002	LOC106614002	XM_014216896.1	granzyme-like protein 2	1.11958	4.83887e-18	1.47861e-16
LOC106599278	LOC106599278	XM_014190428.1	ferritin%2C middle subunit-like	1.11854	2.60476e-08	1.79791e-07
LOC106602262	LOC106602262	XM_014194785.1	ATP-binding cassette sub-family G member 2-like	1.11853	4.64908e-07	2.57498e-06
LOC106585413	LOC106585413	XR_001323962.1	UDP-glucuronosyltransferase 2A2 pseudogene%2C transcript variant X2	1.11836	2.44308e-39	6.71306e-37
LOC106610230	LOC106610230	XM_014209445.1	mucin-5AC-like%2C transcript variant X1	1.11755	4.89477e-15	9.71826e-14
LOC106564958	LOC106564958	XM_014131514.1	keratin%2C type I cytoskeletal 13-like	1.11712	2.36134e-09	1.94952e-08
LOC106571727	LOC106571727	XM_014145129.1	alpha-(1%2C3)-fucosyltransferase 9-like	1.11696	1.88569e-18	6.07673e-17
LOC106577762	LOC106577762	XM_014156086.1	perforin-1-like	1.11593	1.0284e-11	1.24599e-10
LOC106601678	LOC106601678	NA	NA	1.11141	0.000513389	0.00148088
LOC106560373	bphl	XM_014123235.1	biphenyl hydrolase-like (serine hydrolase)%2C transcript variant X2	1.10896	5.9757e-17	1.56437e-15
LOC100195826	groa	NM_001140855.1	Growth-regulated alpha protein	1.10892	3.45571e-08	2.34746e-07
LOC100196302	ppt2a	NM_001141331.1	Lysosomal thioesterase PPT2-A	1.1082	5.92782e-14	1.00555e-12
LOC106574402	LOC106574402	XM_014150259.1	motile sperm domain-containing protein 2-like%2C transcript variant X1	1.10763	1.05258e-46	5.33643e-44
LOC106609519	LOC106609519	XM_014208436.1	anoctamin-4-like%2C transcript variant X3	1.10725	9.04918e-08	5.71765e-07
LOC106613699	LOC106613699	XM_014216230.1	40S ribosomal protein S27-like	1.10721	1.40821e-12	1.94438e-11
LOC100196289	tnfl6	NM_001141318.2	Tumor necrosis factor ligand superfamily member 6	1.10693	3.39402e-09	2.7362e-08
LOC100136509	LOC100136509	NM_001123617.1	tumor necrosis factor alpha	1.10683	2.0211e-21	9.37517e-20
LOC106583350	LOC106583350	XM_014167447.1	zinc finger and SCAN domain-containing protein 2-like	1.1067	1.40713e-15	2.99887e-14
LOC106588291	LOC106588291	XM_014177125.1	C-type lectin domain family 4 member E-like%2C transcript variant X1	1.10527	1.26026e-11	1.50912e-10
LOC106608812	LOC106608812	XM_014206972.1	endonuclease domain-containing 1 protein-like	1.10484	2.98196e-07	1.71907e-06
LOC106590589	LOC106590589	XM_014181701.1	arylamine N-acetyltransferase%2C pineal gland isozyme NAT-10-like	1.10385	3.24879e-22	1.65174e-20
LOC100380666	LOC100380666	XM_014128513.1	eosinophil peroxidase	1.10314	2.80757e-16	6.64439e-15
LOC106584744	LOC106584744	XM_014170284.1	ankyrin repeat and KH domain-containing protein 1-like	1.10263	9.83985e-20	3.67042e-18
LOC106592457	LOC106592457	XM_014183812.1	trichohyalin-like%2C transcript variant X1	1.10263	5.62441e-37	1.30617e-34
LOC106602243	LOC106602243	XM_014194762.1	galectin-5-like%2C transcript variant X2	1.1023	1.34459e-10	1.368e-09
LOC106597715	LOC106597715	NA	NA	1.10171	0.00162668	0.00415099
LOC106612968	LOC106612968	XM_014214719.1	homeobox protein BarH-like 2	1.10054	1.93157e-09	1.61582e-08
LOC106595942	LOC106595942	XM_014187283.1	granzyme-like protein 1	1.10004	2.76121e-06	1.31785e-05
LOC106573878	LOC106573878	XM_014149304.1	guanidinoacetate N-methyltransferase	1.0999	5.39268e-13	7.97842e-12
LOC106607372	LOC106607372	XM_014204291.1	hemoglobin subunit beta-like	1.09862	1.41127e-08	1.01865e-07
LOC106602241	LOC106602241	XM_014194757.1	CD209 antigen-like protein C	1.09696	3.1547e-08	2.15151e-07
LOC106563255	LOC106563255	XM_014128673.1	endothelial differentiation-related factor 1 homolog	1.09695	1.49522e-42	5.85023e-40
LOC106577817	LOC106577817	XM_014156173.1	thioredoxin-like	1.09396	1.38165e-11	1.64192e-10
LOC106576337	LOC106576337	NA	NA	1.09269	5.19707e-05	0.000189442
LOC106594617	LOC106594617	XM_014186022.1	CMRF35-like molecule 5	1.09259	2.8909e-11	3.26108e-10
LOC106562984	LOC106562984	XM_014128155.1	ABC transporter G family member 20-like	1.0917	2.71157e-10	2.61893e-09
LOC106605686	LOC106605686	XM_014201576.1	apolipoprotein C-II-like	1.09016	8.70435e-07	4.56272e-06
LOC106604437	LOC106604437	XR_001328669.1	protein ATP1B4-like%2C transcript variant X2	1.08971	1.41813e-14	2.61645e-13
LOC106609842	LOC106609842	XM_014208865.1	class A basic helix-loop-helix protein 15-like	1.08864	1.66096e-10	1.66401e-09
LOC106588293	LOC106588293	XR_001324624.1	uncharacterized LOC106588293	1.08812	6.03521e-06	2.68666e-05
LOC106576178	LOC106576178	XM_014153154.1	death domain-containing protein CRADD-like	1.08769	3.40545e-10	3.23011e-09
LOC106574968	LOC106574968	XM_014151103.1	uncharacterized LOC106574968	1.08739	1.37276e-14	2.54056e-13
LOC106604841	LOC106604841	XM_014199893.1	myozenin-2-like	1.08701	0.0014921	0.00384437
LOC106590330	LOC106590330	XM_014181218.1	heme oxygenase-like	1.08597	3.8533e-13	5.80106e-12
LOC106571855	LOC106571855	XM_014145355.1	glutamate receptor-interacting protein 2-like%2C transcript variant X5	1.08574	1.43717e-14	2.64672e-13
LOC106604125	dok3	XM_014198529.1	docking protein 3	1.0854	9.08885e-13	1.29621e-11
LOC106575435	LOC106575435	NA	NA	1.08539	0.000835232	0.00229311
LOC106584449	LOC106584449	XM_014169804.1	complement factor D-like	1.08487	7.16155e-15	1.38593e-13
LOC106583420	LOC106583420	XR_001323513.1	uncharacterized LOC106583420%2C transcript variant X1	1.08478	6.0205e-10	5.49327e-09
LOC106566689	LOC106566689	XM_014134978.1	MAM domain-containing protein 2-like	1.08418	1.36502e-12	1.89055e-11
LOC106562432	LOC106562432	XM_014127319.1	protein unc-13 homolog B-like	1.08319	0.000622532	0.00175947
LOC106573404	LOC106573404	XM_014148423.1	CD209 antigen-like protein A%2C transcript variant X3	1.08198	7.25203e-36	1.52657e-33
LOC100196042	hpgds	NM_001141071.1	hematopoietic prostaglandin D synthase	1.08154	3.16099e-18	9.95478e-17
LOC100194744	co7	NM_001139773.1	Complement component C7	1.08066	2.87674e-05	0.000111357
LOC106578519	cubn	XM_014157416.1	cubilin (intrinsic factor-cobalamin receptor)	1.08038	1.30922e-22	6.95083e-21
LOC106577240	LOC106577240	XM_014155166.1	CMRF35-like molecule 5%2C transcript variant X3	1.07994	7.16587e-18	2.13706e-16
LOC106594744	LOC106594744	XM_014186132.1	crustapain-like	1.07953	2.44512e-13	3.79052e-12
LOC106596088	LOC106596088	XM_014187410.1	suppressor of cytokine signaling 1-like	1.07935	1.23566e-15	2.65545e-14
LOC106588862	LOC106588862	XM_014178360.1	transmembrane channel-like protein 5%2C transcript variant X2	1.07901	1.52263e-05	6.23748e-05
LOC106606130	LOC106606130	XM_014202253.1	eomesodermin-like	1.07886	7.58897e-08	4.85727e-07
LOC106581291	LOC106581291	XM_014163256.1	CD83 antigen-like	1.0787	3.10351e-27	2.77206e-25
LOC106609554	LOC106609554	XR_001329712.1	Ig kappa-b4 chain C region-like	1.07821	0.000778041	0.00214987
LOC106564408	LOC106564408	NA	NA	1.07818	0.0016364	0.00417314
LOC106591183	serf2	XM_014182393.1	small EDRK-rich factor 2%2C transcript variant X1	1.07786	1.03993e-32	1.64905e-30
LOC106577163	LOC106577163	XM_014154975.1	myelin and lymphocyte protein-like	1.07729	4.86974e-07	2.68728e-06
LOC106602711	LOC106602711	XM_014195511.1	uncharacterized LOC106602711	1.07676	1.10796e-10	1.14014e-09
LOC106590498	LOC106590498	XM_014181586.1	SH2 domain-containing protein 1A-like	1.0757	7.46533e-06	3.26119e-05
LOC106583430	LOC106583430	XM_014167581.1	interferon-induced protein 44-like%2C transcript variant X1	1.07362	0.000160787	0.000522071
LOC100195248	card9	NM_001140277.1	caspase recruitment domain family%2C member 9	1.07336	1.03609e-17	3.04202e-16
LOC106560895	LOC106560895	XM_014124299.1	uncharacterized LOC106560895%2C transcript variant X1	1.07316	2.37383e-15	4.89396e-14
LOC100194583	fkbp1b	NM_001139669.1	FK506 binding protein 1b	1.07267	2.69052e-40	8.1385e-38
LOC106609490	LOC106609490	XM_014208363.1	normal mucosa of esophagus-specific gene 1 protein-like	1.07165	8.88387e-08	5.62406e-07
LOC106581628	LOC106581628	XM_014163776.1	non-syndromic hearing impairment protein 5-like	1.07136	8.03769e-14	1.34507e-12
LOC106610954	LOC106610954	XM_014210667.1	tumor necrosis factor alpha-induced protein 2-like%2C transcript variant X2	1.07092	6.20495e-20	2.37358e-18
LOC100194845	svip	NM_001139874.1	small VCP/p97-interacting protein	1.07054	2.51718e-06	1.20989e-05
LOC106575638	tigit	XM_014152254.1	T cell immunoreceptor with Ig and ITIM domains%2C transcript variant X1	1.07023	1.42731e-20	5.98107e-19
LOC106585402	LOC106585402	XM_014171560.1	adhesion G protein-coupled receptor E2-like	1.06931	1.85105e-14	3.35501e-13
LOC106562568	LOC106562568	XM_014127512.1	hydroxycarboxylic acid receptor 2-like	1.06848	2.70089e-11	3.06305e-10
LOC106584327	LOC106584327	XM_014169496.1	stathmin-like%2C transcript variant X2	1.06846	2.82112e-10	2.71161e-09
LOC106597691	LOC106597691	XM_014188847.1	eomesodermin-like%2C transcript variant X1	1.06743	2.00599e-07	1.19292e-06
LOC106613992	LOC106613992	XM_014216885.1	FYN-binding protein-like	1.06643	1.76548e-06	8.71986e-06
LOC106600810	LOC106600810	XM_014192505.1	perforin-1-like%2C transcript variant X2	1.06439	0.000181036	0.000581421
LOC106585781	slc2a6	XM_014172393.1	solute carrier family 2 (facilitated glucose transporter)%2C member 6%2C transcript variant X1	1.06394	1.20695e-23	7.06429e-22
LOC106598141	LOC106598141	XM_014189207.1	zinc finger protein 135-like	1.06283	8.95903e-08	5.66765e-07
LOC106591148	LOC106591148	XR_001325237.1	uncharacterized LOC106591148	1.06214	1.95088e-19	7.0294e-18
LOC106564720	LOC106564720	XM_014131006.1	C-X-C motif chemokine 11-like	1.06201	6.9043e-18	2.06247e-16
LOC106598208	LOC106598208	XM_014189265.1	pregnancy zone protein-like	1.06153	4.11809e-07	2.30752e-06
LOC106596886	LOC106596886	XM_014188139.1	hyaluronan synthase 3-like	1.05991	0.00370562	0.00860176
LOC106594352	LOC106594352	XM_014185708.1	uncharacterized LOC106594352	1.05916	2.24474e-05	8.87248e-05
LOC106572000	LOC106572000	XM_014145681.1	uncharacterized LOC106572000%2C transcript variant X2	1.05869	3.93868e-52	2.8934e-49
LOC106612748	LOC106612748	NA	NA	1.05869	1.09129e-17	3.19626e-16
LOC106586276	LOC106586276	NA	NA	1.05866	1.83239e-27	1.67834e-25
LOC106606237	LOC106606237	XM_014202385.1	B-cell receptor CD22-like%2C transcript variant X1	1.05799	2.12517e-13	3.33032e-12
LOC106582693	LOC106582693	XM_014165998.1	protein FAM208A-like%2C transcript variant X3	1.0577	6.19076e-26	4.69142e-24
LOC106579224	gper1	XM_014158923.1	G protein-coupled estrogen receptor 1	1.05747	3.36315e-24	2.08365e-22
LOC106577783	LOC106577783	XM_014156124.1	putative E3 ubiquitin-protein ligase ARI6	1.05744	4.73665e-19	1.63158e-17
LOC106575428	LOC106575428	NA	NA	1.05733	9.59915e-06	4.10467e-05
LOC106585117	LOC106585117	XM_014170964.1	vesicle-associated membrane protein 5-like%2C transcript variant X1	1.0566	2.56857e-24	1.61358e-22
LOC106588363	LOC106588363	XM_014177271.1	venom phosphodiesterase 1-like	1.05631	7.43681e-20	2.81488e-18
LOC106605437	LOC106605437	XM_014201091.1	membrane-spanning 4-domains subfamily A member 4A-like	1.05625	3.44675e-30	4.3533e-28
LOC106576185	LOC106576185	XM_014153164.1	hemagglutinin/amebocyte aggregation factor-like%2C transcript variant X2	1.05583	6.25495e-11	6.67319e-10
LOC106574474	LOC106574474	XM_014150376.1	tetraspanin-3-like%2C transcript variant X4	1.05563	8.35954e-35	1.61779e-32
LOC106612128	hlf	XM_014213021.1	hepatic leukemia factor%2C transcript variant X1	1.05545	1.62128e-16	3.97275e-15
LOC100195426	mag	NM_001140455.1	myelin associated glycoprotein	1.055	9.72868e-21	4.17394e-19
LOC106604275	LOC106604275	XM_014198764.1	uncharacterized LOC106604275	1.05457	1.98392e-43	8.50157e-41
LOC106600897	LOC106600897	XM_014192659.1	cytokine receptor common subunit beta-like%2C transcript variant X3	1.0542	8.90512e-29	9.54014e-27
LOC106582243	LOC106582243	XR_001323276.1	uncharacterized LOC106582243	1.05398	5.59192e-09	4.34557e-08
LOC106595269	LOC106595269	XM_014186644.1	hemoglobin subunit alpha-4-like	1.05332	9.06494e-08	5.72459e-07
LOC100196106	nrt1	NM_001141135.1	NADP+--arginine ADP-ribosyltransferase 1	1.05325	6.37699e-07	3.43735e-06
LOC106586289	LOC106586289	XM_014173426.1	uncharacterized LOC106586289	1.05312	2.86379e-07	1.65758e-06
LOC106610211	LOC106610211	XM_014209413.1	mucin-5AC-like	1.05171	1.65097e-26	1.35681e-24
LOC106612224	LOC106612224	XM_014213197.1	glucosamine-6-phosphate isomerase 1-like	1.05081	2.12478e-10	2.09314e-09
LOC100196450	haao	NM_001141479.1	3-hydroxyanthranilate 3%2C4-dioxygenase	1.04999	3.86323e-29	4.2788e-27
LOC106577751	LOC106577751	XM_014156069.1	uncharacterized LOC106577751	1.04971	9.43669e-19	3.13401e-17
LOC106602759	LOC106602759	XM_014195600.1	C-type lectin domain family 4 member E-like%2C transcript variant X2	1.04768	4.55699e-05	0.000168447
LOC106566248	LOC106566248	XM_014134139.1	mimecan-like	1.04766	9.48403e-08	5.96414e-07
LOC106568372	LOC106568372	XM_014138664.1	C3a anaphylatoxin chemotactic receptor	1.04745	6.46402e-30	7.96846e-28
LOC106609555	LOC106609555	NA	NA	1.04703	0.00168471	0.00427786
LOC106592699	LOC106592699	XM_014184028.1	cysteine-rich protein 2-like	1.04631	8.83383e-06	3.8059e-05
LOC106606429	LOC106606429	XM_014202622.1	suppressor of cytokine signaling 3-like	1.04617	2.83666e-15	5.80492e-14
LOC106563900	map3k7cl	XM_014129849.1	MAP3K7 C-terminal like	1.04609	1.07691e-10	1.11169e-09
LOC106610033	LOC106610033	NA	NA	1.04598	3.56079e-10	3.36681e-09
LOC106574553	LOC106574553	XM_014150523.1	2-oxoglutarate receptor 1-like	1.04526	0.000103772	0.00035276
LOC106603501	LOC106603501	XM_014197276.1	P2X purinoceptor 5-like%2C transcript variant X3	1.04457	0.000412598	0.00121657
LOC106588304	LOC106588304	NA	NA	1.04422	3.36795e-05	0.000128031
LOC106604564	LOC106604564	XM_014199322.1	proteinase-activated receptor 4-like	1.04378	3.41262e-25	2.3899e-23
LOC106593474	LOC106593474	NA	NA	1.04331	1.53874e-08	1.10248e-07
LOC106600984	LOC106600984	XM_014192800.1	ADP-ribosylation factor-like protein 5B	1.04292	1.13721e-20	4.83296e-19
LOC106586275	LOC106586275	XM_014173400.1	interleukin-1 receptor-like 1	1.04285	3.18814e-27	2.82661e-25
LOC106586893	LOC106586893	XM_014174627.1	C-X-C motif chemokine 11-like	1.04266	2.50311e-15	5.14281e-14
LOC100194884	cebpb	NM_001139913.1	CCAAT/enhancer binding protein (C/EBP)%2C beta	1.04168	4.41011e-09	3.48385e-08
LOC106564853	LOC106564853	XM_014131319.1	eosinophil peroxidase-like	1.04153	2.99701e-05	0.000115504
LOC106576389	LOC106576389	NA	NA	1.04143	0.00038639	0.00114662
LOC106608396	LOC106608396	NA	NA	1.03987	6.22548e-12	7.77289e-11
LOC106581880	LOC106581880	XM_014164320.1	uncharacterized LOC106581880	1.03884	3.2926e-12	4.29577e-11
LOC106565746	LOC106565746	XM_014133207.1	PRA1 family protein 3-like	1.03834	5.04808e-25	3.43498e-23
LOC106609040	LOC106609040	XM_014207381.1	leucine-rich repeat protein soc-2 homolog	1.03759	1.08463e-06	5.59025e-06
LOC106607440	LOC106607440	XM_014204390.1	interleukin-3 receptor class 2 subunit beta-like%2C transcript variant X9	1.03732	5.58143e-10	5.1161e-09
LOC106570145	phyhd1	XM_014142181.1	phytanoyl-CoA dioxygenase domain containing 1	1.03715	1.79733e-07	1.07684e-06
LOC106581815	LOC106581815	XM_014164190.1	uncharacterized LOC106581815	1.03702	1.41862e-16	3.51443e-15
LOC106612654	LOC106612654	XM_014214037.1	uncharacterized LOC106612654	1.03686	2.58176e-26	2.05604e-24
LOC106605553	LOC106605553	XM_014201337.1	C-X-C chemokine receptor type 3-like	1.03623	4.21106e-17	1.12784e-15
LOC106606767	LOC106606767	XM_014203125.1	uncharacterized LOC106606767	1.03567	0.000794552	0.00219129
LOC106576235	LOC106576235	XM_014153283.1	ADM2-like%2C transcript variant X1	1.0356	6.53843e-10	5.92989e-09
LOC106562180	LOC106562180	XM_014126878.1	uncharacterized LOC106562180%2C transcript variant X3	1.0347	0.00096705	0.00261022
LOC106569234	LOC106569234	XM_014140395.1	protein canopy-1-like%2C transcript variant X2	1.03393	7.44408e-08	4.77132e-07
LOC106571034	LOC106571034	XM_014143667.1	stathmin-4-like%2C transcript variant X1	1.03335	1.39639e-10	1.4147e-09
LOC100195575	otor	NM_001140604.2	otoraplin	1.03333	7.75219e-05	0.00027121
LOC106584549	LOC106584549	XM_014169971.1	receptor-type tyrosine-protein phosphatase zeta-like%2C transcript variant X4	1.03328	6.71031e-12	8.32912e-11
LOC106589190	LOC106589190	NA	NA	1.03301	1.60746e-13	2.56481e-12
LOC106603540	LOC106603540	XM_014197369.1	protein Wnt-11-like	1.03288	2.22174e-08	1.55198e-07
LOC106564407	LOC106564407	NA	NA	1.03286	1.60207e-05	6.53686e-05
LOC106581273	LOC106581273	XM_014163231.1	E3 ubiquitin-protein ligase TRIM17-like%2C transcript variant X1	1.03146	3.35371e-23	1.87454e-21
LOC100194961	stoml3	NM_001139990.1	stomatin (EPB72)-like 3	1.0309	1.60234e-16	3.93437e-15
LOC106592431	LOC106592431	XM_014183780.1	uncharacterized LOC106592431	1.03016	7.71293e-12	9.48854e-11
LOC100136378	LOC100136378	XM_014200712.1	nuclear receptor subfamily 1 group D member 2	1.02971	3.5884e-13	5.4204e-12
LOC106561312	fjx1	XM_014125130.1	four jointed box 1	1.02966	1.31788e-12	1.83079e-11
LOC106598125	LOC106598125	XM_014189195.1	tubulin alpha chain-like	1.02963	6.58939e-35	1.29613e-32
LOC106585067	LOC106585067	XM_014170831.1	uncharacterized LOC106585067%2C transcript variant X4	1.02898	2.84171e-19	1.00383e-17
LOC106579561	LOC106579561	XM_014159589.1	neutrophil cytosol factor 2-like%2C transcript variant X1	1.02837	2.90003e-42	1.11053e-39
LOC106585763	LOC106585763	XM_014172349.1	versican core protein-like%2C transcript variant X2	1.02834	1.01332e-05	4.30846e-05
LOC106581890	LOC106581890	XM_014164327.1	major histocompatibility complex class I-related gene protein-like	1.02829	7.26577e-16	1.61029e-14
LOC106597727	LOC106597727	NA	NA	1.02826	1.76395e-05	7.12227e-05
LOC100136449	LOC100136449	NM_001123582.1	interleukin-1 beta	1.02808	1.70507e-06	8.45627e-06
LOC106609071	LOC106609071	XM_014207455.1	oligosaccharyltransferase complex subunit ostc%2C transcript variant X2	1.02783	8.61254e-15	1.6464e-13
LOC100195628	dram1	NM_001140657.1	DNA-damage regulated autophagy modulator 1	1.02569	4.15355e-20	1.62512e-18
LOC106577944	LOC106577944	XR_001322244.1	uncharacterized LOC106577944%2C transcript variant X2	1.02483	4.07989e-36	8.84697e-34
LOC106580552	LOC106580552	XM_014161738.1	bone morphogenetic protein 10-like	1.02467	1.80025e-05	7.2542e-05
LOC106577717	LOC106577717	XM_014156042.1	uncharacterized LOC106577717	1.02451	0.000481305	0.00139797
LOC106598334	LOC106598334	XM_014189378.1	dispanin subfamily A member 2b-like	1.02444	0.00312189	0.0073965
LOC106569695	LOC106569695	XM_014141258.1	natural killer cell receptor 2B4-like	1.02436	1.79078e-06	8.83634e-06
LOC106590881	LOC106590881	XM_014182057.1	pancreatic progenitor cell differentiation and proliferation factor B-like	1.02405	3.12497e-09	2.53234e-08
LOC106584037	LOC106584037	XM_014168848.1	cAMP-specific 3'%2C5'-cyclic phosphodiesterase 4B-like%2C transcript variant X6	1.02385	2.42864e-28	2.51934e-26
LOC106612591	LOC106612591	XM_014213886.1	creatine kinase M-type-like%2C transcript variant X2	1.02282	0.000651996	0.00183425
LOC106588874	galnt15	XM_014178376.1	polypeptide N-acetylgalactosaminyltransferase 15	1.02205	1.33317e-05	5.53122e-05
LOC100286405	spd2a	NM_001146354.1	SH3 and PX domain-containing protein 2A	1.02173	3.97499e-26	3.09037e-24
LOC106592537	LOC106592537	XM_014183877.1	zymogen granule membrane protein 16-like%2C transcript variant X1	1.0197	4.81862e-05	0.000176973
LOC106583154	LOC106583154	XM_014167009.1	musculoskeletal embryonic nuclear protein 1-like	1.01934	3.98609e-24	2.44435e-22
LOC100195691	hbad	NM_001140720.1	Hemoglobin subunit alpha-D	1.01924	1.78683e-12	2.42529e-11
LOC106611884	LOC106611884	XM_014212518.1	uncharacterized LOC106611884%2C transcript variant X1	1.01881	7.75713e-08	4.95433e-07
LOC106571801	armc2	XR_001321010.1	armadillo repeat containing 2%2C transcript variant X2	1.01652	8.76075e-22	4.24431e-20
LOC106610884	LOC106610884	XR_001330005.1	uncharacterized LOC106610884	1.01651	1.807e-14	3.27848e-13
LOC106591927	LOC106591927	XM_014183194.1	suppressor of cytokine signaling 1-like	1.01639	7.18678e-19	2.42451e-17
LOC106588302	LOC106588302	XM_014177137.1	uncharacterized LOC106588302	1.01603	0.00193769	0.00484402
LOC106572883	LOC106572883	XR_001321216.1	uncharacterized LOC106572883	1.0154	1.61639e-15	3.39659e-14
LOC106582621	LOC106582621	XM_014165847.1	tumor necrosis factor receptor superfamily member 4-like%2C transcript variant X2	1.01539	2.20842e-15	4.57126e-14
LOC106594777	LOC106594777	XM_014186163.1	hemoglobin subunit alpha-4-like	1.0147	2.13859e-07	1.26592e-06
LOC106612998	LOC106612998	XR_001330402.1	uncharacterized LOC106612998%2C transcript variant X1	1.01441	1.74504e-11	2.03943e-10
LOC100380614	ikzf1	NM_001173899.1	IKAROS family zinc finger 1 (Ikaros)	1.01412	3.12096e-27	2.78074e-25
LOC106564570	LOC106564570	XM_014130713.1	transcription factor jun-B-like	1.01293	0.000215071	0.000677493
LOC106605502	LOC106605502	XM_014201229.1	uncharacterized LOC106605502%2C transcript variant X1	1.01291	1.92533e-09	1.61097e-08
LOC106601268	LOC106601268	XM_014193348.1	membrane primary amine oxidase-like%2C transcript variant X1	1.0125	1.45194e-09	1.23936e-08
LOC106588887	LOC106588887	XM_014178408.1	transmembrane channel-like protein 5	1.01243	2.8415e-06	1.35348e-05
LOC106572900	LOC106572900	XM_014147485.1	pancreatic progenitor cell differentiation and proliferation factor B-like	1.01229	2.43348e-16	5.80488e-15
LOC106610421	LOC106610421	XM_014209788.1	T-cell ecto-ADP-ribosyltransferase 1-like	1.01221	2.27875e-08	1.58903e-07
LOC106592577	LOC106592577	XM_014183920.1	transcription factor PU.1-like	1.01185	8.27808e-20	3.11042e-18
LOC106579351	LOC106579351	XM_014159194.1	scavenger receptor cysteine-rich domain-containing group B protein-like	1.01162	0.000385423	0.00114422
LOC106601034	LOC106601034	XM_014192902.1	complement C1q-like protein 2	1.01156	6.75027e-08	4.36078e-07
LOC106609011	LOC106609011	XM_014207332.1	SLAM family member 8-like	1.01145	1.77928e-17	5.0584e-16
LOC106561799	LOC106561799	XM_014126044.1	transcription factor PU.1-like	1.01139	2.67148e-16	6.33483e-15
LOC100286524	csrp1	NM_001146463.1	Cysteine and glycine-rich protein 1	1.01115	6.98445e-33	1.13249e-30
LOC106586296	LOC106586296	XM_014173431.1	uncharacterized LOC106586296	1.01106	0.000168486	0.00054486
LOC106577908	LOC106577908	XM_014156349.1	IGF-like family receptor 1%2C transcript variant X1	1.011	2.48133e-13	3.83938e-12
LOC106586222	LOC106586222	XM_014173259.1	cytochrome b reductase 1-like	1.01096	3.20684e-14	5.65296e-13
LOC106610741	LOC106610741	XM_014210269.1	C-C chemokine receptor type 6-like	1.01063	1.34878e-05	5.58951e-05
LOC106596957	LOC106596957	XR_001326800.1	uncharacterized LOC106596957	1.01017	1.14406e-05	4.81662e-05
LOC106592493	LOC106592493	XM_014183843.1	receptor-type tyrosine-protein phosphatase O-like	1.01016	1.62082e-06	8.07964e-06
LOC106565782	LOC106565782	XM_014133293.1	granzyme K-like	1.00963	2.57274e-11	2.93157e-10
LOC106593503	LOC106593503	XR_001325900.1	uncharacterized LOC106593503	1.00898	3.30447e-07	1.88866e-06
LOC106598498	LOC106598498	XM_014189545.1	dispanin subfamily A member 2b-like	1.00879	0.00256776	0.00621455
LOC106606261	LOC106606261	XM_014202408.1	ketosamine-3-kinase-like	1.00861	2.359e-11	2.70515e-10
LOC106582199	LOC106582199	XM_014165038.1	interferon-induced guanylate-binding protein 1-like	1.00856	2.2996e-10	2.25058e-09
LOC106597714	LOC106597714	NA	NA	1.00811	8.52901e-06	3.68206e-05
LOC106589967	LOC106589967	XM_014180437.1	uncharacterized LOC106589967	1.00799	0.000145638	0.000477143
LOC106594455	LOC106594455	XM_014185827.1	putative DNA helicase ino80	1.00776	3.75803e-18	1.16918e-16
LOC106611226	LOC106611226	XM_014211216.1	egl nine homolog 3-like%2C transcript variant X2	1.00768	9.78981e-13	1.39011e-11
LOC106561539	LOC106561539	XM_014125607.1	tryptophan 5-hydroxylase 2-like	1.00729	6.10318e-07	3.3061e-06
LOC106588292	LOC106588292	XR_001324623.1	uncharacterized LOC106588292	1.00727	6.82718e-09	5.22763e-08
LOC106584848	LOC106584848	XM_014170451.1	mucin-2-like	1.00714	1.0791e-06	5.5676e-06
LOC106573974	LOC106573974	XR_001321451.1	uncharacterized LOC106573974	1.00673	7.05904e-07	3.77447e-06
LOC106609426	LOC106609426	NA	NA	1.00636	0.000271606	0.000836906
LOC106600998	LOC106600998	XM_014192833.1	integrin beta-3-like	1.0056	7.8038e-17	2.01511e-15
LOC106563525	LOC106563525	XM_014129203.1	growth arrest-specific protein 2-like%2C transcript variant X2	1.00551	2.38748e-08	1.65843e-07
LOC106569333	LOC106569333	XM_014140574.1	atypical chemokine receptor 2-like	1.0039	2.95552e-19	1.04199e-17
LOC106564715	LOC106564715	XM_014131003.1	cysteine-rich protein 1-like	1.00356	0.000104427	0.000354787
LOC100302030	LOC100302030	NM_001161693.1	TLR8-like	1.0035	4.78631e-29	5.25268e-27
LOC106613310	LOC106613310	XM_014215400.1	P2Y purinoceptor 12-like%2C transcript variant X1	1.00348	3.87728e-07	2.18414e-06
LOC106600191	LOC106600191	XM_014191518.1	vascular cell adhesion protein 1-like	1.00308	0.00429895	0.00983007
LOC106601915	LOC106601915	XM_014194350.1	suppressor of cytokine signaling 3-like	1.00289	1.37048e-07	8.37693e-07
LOC106604443	LOC106604443	XM_014199059.1	ankyrin repeat domain-containing protein SOWAHC-like	1.00097	3.3499e-14	5.88624e-13
LOC106611175	LOC106611175	XM_014211117.1	NF-kappa-B inhibitor alpha-like	1.00081	2.06899e-31	2.96715e-29
LOC100270810	ncf1	NM_001145422.1	neutrophil cytosolic factor 1	1.00066	4.73352e-16	1.07568e-14
LOC106567225	LOC106567225	XM_014136259.1	sterile alpha motif domain-containing protein 10-like%2C transcript variant X3	1.00029	2.59705e-07	1.5139e-06
LOC106573534	LOC106573534	XR_001321365.1	uncharacterized LOC106573534	-1.00037	9.84215e-07	5.10929e-06
LOC106597812	LOC106597812	XR_001327003.1	uncharacterized LOC106597812%2C transcript variant X1	-1.00073	6.6987e-06	2.95426e-05
LOC106560903	LOC106560903	XM_014124319.1	protein spire homolog 2-like	-1.00103	5.70597e-14	9.7158e-13
LOC106584422	fam46b	XM_014169745.1	family with sequence similarity 46%2C member B	-1.00154	7.79371e-24	4.64474e-22
LOC106577558	LOC106577558	XM_014155701.1	CTD nuclear envelope phosphatase 1A-like	-1.00202	7.43604e-74	1.27461e-70
LOC106611923	LOC106611923	XM_014212586.1	peroxisome proliferator-activated receptor gamma coactivator 1-beta-like	-1.00229	6.6961e-13	9.75446e-12
LOC106597699	LOC106597699	XM_014188855.1	high-affinity choline transporter 1-like	-1.00258	2.12498e-08	1.48931e-07
LOC106573917	LOC106573917	XM_014149378.1	phospholipase A2 inhibitor and Ly6/PLAUR domain-containing protein-like	-1.00268	2.5123e-16	5.97704e-15
LOC106563450	LOC106563450	XM_014129044.1	sodium/potassium/calcium exchanger 3-like%2C transcript variant X2	-1.00288	1.71798e-09	1.44893e-08
LOC106594849	LOC106594849	XM_014186234.1	uncharacterized LOC106594849	-1.003	7.45268e-17	1.93276e-15
LOC106607941	LOC106607941	XM_014205438.1	protein SOGA3-like%2C transcript variant X3	-1.00304	5.7881e-18	1.75083e-16
LOC106589858	LOC106589858	XM_014180261.1	uncharacterized LOC106589858%2C transcript variant X1	-1.00421	1.03675e-16	2.62172e-15
LOC106577767	LOC106577767	XM_014156097.1	interferon-induced very large GTPase 1-like%2C transcript variant X2	-1.00528	0.000629005	0.0017761
LOC106613326	LOC106613326	XM_014215428.1	beta-arrestin-1%2C transcript variant X2	-1.00538	3.0261e-06	1.43089e-05
LOC106596007	LOC106596007	XR_001326541.1	uncharacterized LOC106596007%2C transcript variant X2	-1.00708	2.92439e-07	1.68831e-06
LOC106566942	LOC106566942	XM_014135608.1	serine/threonine-protein kinase 35-like	-1.00714	9.4832e-17	2.42097e-15
LOC106565842	LOC106565842	XM_014133425.1	A disintegrin and metalloproteinase with thrombospondin motifs 9-like	-1.00749	1.72821e-14	3.14343e-13
LOC106569929	col14a1	XM_014141685.1	collagen%2C type XIV%2C alpha 1%2C transcript variant X2	-1.00782	1.21761e-11	1.46049e-10
LOC106585770	LOC106585770	XM_014172366.1	transmembrane protein 161B-like%2C transcript variant X1	-1.01034	5.05192e-07	2.77802e-06
LOC106580856	LOC106580856	XR_001322976.1	uncharacterized LOC106580856%2C transcript variant X2	-1.01088	1.10402e-18	3.62924e-17
LOC106581819	acvr1c	XM_014164197.1	activin A receptor%2C type IC%2C transcript variant X2	-1.01315	8.75449e-10	7.77898e-09
LOC106566601	LOC106566601	XM_014134765.1	dynein heavy chain 12%2C axonemal-like%2C transcript variant X5	-1.01427	2.14127e-17	5.99822e-16
LOC106604584	LOC106604584	XM_014199368.1	stonustoxin subunit beta-like%2C transcript variant X2	-1.01434	3.38729e-16	7.90208e-15
LOC106613462	LOC106613462	NA	NA	-1.0151	7.64928e-06	3.33467e-05
LOC106563908	LOC106563908	XM_014129857.1	large neutral amino acids transporter small subunit 4-like	-1.01612	1.47813e-05	6.0676e-05
LOC106571282	cssa15h6orf165	XM_014144180.1	chromosome ssa15 open reading frame%2C human C6orf165	-1.01634	7.64513e-10	6.8627e-09
LOC106563676	LOC106563676	XM_014129465.1	NHS-like protein 2%2C transcript variant X4	-1.01658	3.31424e-10	3.1494e-09
LOC106577766	LOC106577766	XM_014156094.1	interferon-induced very large GTPase 1-like%2C transcript variant X2	-1.01664	0.000642583	0.00181003
LOC106578887	LOC106578887	XM_014158122.1	carbonic anhydrase-related protein 10%2C transcript variant X1	-1.01684	1.20109e-12	1.68423e-11
LOC106583121	LOC106583121	XM_014166953.1	ethanolamine kinase 1-like	-1.01908	2.8454e-13	4.36958e-12
LOC106571429	LOC106571429	XM_014144519.1	EH domain-containing protein 3-like%2C transcript variant X3	-1.01947	9.80081e-23	5.29715e-21
LOC100194951	acod	NM_001139980.1	Acyl-CoA desaturase	-1.02136	3.48737e-28	3.54608e-26
LOC106567315	LOC106567315	NA	NA	-1.02265	4.05501e-10	3.79621e-09
LOC106586978	cmya5	XM_014174766.1	cardiomyopathy associated 5	-1.0229	4.74142e-11	5.16875e-10
LOC106593885	LOC106593885	XM_014185266.1	lysyl oxidase homolog 3-like	-1.02324	0.000118748	0.000397439
LOC106590872	LOC106590872	XM_014182132.1	intraflagellar transport protein 43 homolog B%2C transcript variant X2	-1.02452	1.19166e-42	4.76609e-40
LOC106565706	LOC106565706	XM_014133103.1	zinc finger protein 362-like%2C transcript variant X4	-1.02472	1.44191e-30	1.90121e-28
LOC106585972	LOC106585972	XM_014172729.1	atrial natriuretic peptide receptor 3-like	-1.0252	1.90168e-17	5.37307e-16
LOC106569547	LOC106569547	XM_014141007.1	uncharacterized LOC106569547	-1.02677	3.79676e-19	1.32174e-17
LOC106581345	LOC106581345	XM_014163347.1	protocadherin Fat 3-like	-1.02724	2.48145e-09	2.04072e-08
LOC106611908	LOC106611908	XM_014212565.1	Kv channel-interacting protein 1-like	-1.02844	1.7057e-06	8.45825e-06
LOC106610505	LOC106610505	XM_014209888.1	von Willebrand factor A domain-containing protein 7-like%2C transcript variant X2	-1.0287	9.26292e-11	9.64501e-10
LOC106602131	LOC106602131	XM_014194600.1	high affinity choline transporter 1-like	-1.0294	2.27013e-20	9.23026e-19
LOC106586420	LOC106586420	XM_014173654.1	sterol 26-hydroxylase%2C mitochondrial-like%2C transcript variant X1	-1.02958	5.32077e-17	1.40312e-15
LOC106561769	LOC106561769	XM_014126008.1	tight junction protein ZO-1-like	-1.02988	1.28882e-08	9.36462e-08
LOC106609368	LOC106609368	XM_014208140.1	pendrin-like%2C transcript variant X1	-1.03021	5.69389e-07	3.10447e-06
LOC106562039	LOC106562039	XM_014126564.1	probable C-mannosyltransferase DPY19L3%2C transcript variant X1	-1.03029	5.96522e-11	6.39631e-10
LOC106585992	LOC106585992	XM_014172751.1	neurofilament heavy polypeptide-like	-1.03032	0.0015767	0.00403462
LOC106602650	LOC106602650	XM_014195401.1	E3 ISG15--protein ligase HERC5-like%2C transcript variant X5	-1.03171	6.08865e-05	0.000218502
LOC106592152	LOC106592152	XR_001325580.1	uncharacterized LOC106592152	-1.03325	3.9051e-05	0.000146333
LOC106570650	LOC106570650	XR_001320723.1	uncharacterized LOC106570650	-1.03331	2.43222e-17	6.73982e-16
LOC106581433	LOC106581433	XM_014163494.1	pentraxin-related protein PTX3-like	-1.03402	4.17787e-08	2.79789e-07
LOC106589658	LOC106589658	XM_014179900.1	actin%2C alpha skeletal muscle 2-like	-1.03406	1.04468e-05	4.42923e-05
LOC106562989	LOC106562989	XM_014128166.1	tubulin alpha chain%2C testis-specific-like	-1.0341	3.40174e-45	1.65472e-42
LOC106576624	LOC106576624	XM_014153870.1	vesicle-associated membrane protein 1-like	-1.03501	5.20521e-08	3.42974e-07
LOC106613324	wdr53	XM_014215425.1	WD repeat domain 53%2C transcript variant X2	-1.03637	1.07233e-16	2.7048e-15
LOC106612874	LOC106612874	XM_014214912.1	lysyl oxidase homolog 3-like	-1.03742	2.74811e-06	1.3123e-05
LOC106594145	LOC106594145	XM_014185510.1	transmembrane and coiled-coil domain-containing protein 3-like	-1.03768	3.20105e-30	4.08599e-28
LOC106580762	LOC106580762	XM_014162147.1	ras-related protein Rab-1A-like	-1.03783	1.579e-09	1.33673e-08
LOC106585176	LOC106585176	XM_014171097.1	uncharacterized LOC106585176	-1.04086	4.68952e-06	2.13865e-05
LOC106595186	LOC106595186	XM_014186565.1	uncharacterized LOC106595186%2C transcript variant X1	-1.04191	3.23522e-12	4.22551e-11
LOC106609675	LOC106609675	XM_014208646.1	exocyst complex component 4-like	-1.0441	1.98113e-11	2.29523e-10
LOC106592174	LOC106592174	XM_014183487.1	IQ calmodulin-binding motif-containing protein 1-like	-1.04534	2.1243e-41	7.08023e-39
LOC106570539	LOC106570539	XM_014142978.1	DNA-binding protein SATB1-like%2C transcript variant X1	-1.04545	1.1957e-10	1.22622e-09
LOC106598465	LOC106598465	XR_001327193.1	uncharacterized LOC106598465	-1.04593	3.90425e-12	5.0426e-11
LOC106590121	LOC106590121	XM_014180722.1	uncharacterized LOC106590121	-1.04674	3.8887e-21	1.74102e-19
LOC106598974	LOC106598974	XM_014190007.1	small conductance calcium-activated potassium channel protein 2-like%2C transcript variant X3	-1.04726	3.3138e-08	2.25446e-07
LOC106611115	LOC106611115	XM_014210981.1	intron-binding protein aquarius-like	-1.04736	7.65023e-07	4.05923e-06
LOC106589827	LOC106589827	XM_014180211.1	neuromedin-K receptor-like	-1.04873	4.55295e-09	3.58925e-08
LOC106605388	LOC106605388	NA	NA	-1.05157	4.3252e-05	0.000160439
LOC106610249	LOC106610249	XM_014209504.1	monocarboxylate transporter 4-like%2C transcript variant X2	-1.05195	6.12423e-06	2.72292e-05
LOC106606434	notum	XM_014202633.1	notum pectinacetylesterase homolog (Drosophila)	-1.05208	1.38718e-09	1.18803e-08
LOC106604776	frmpd1	XM_014199799.1	FERM and PDZ domain containing 1%2C transcript variant X2	-1.05213	1.72877e-11	2.02107e-10
LOC106605853	LOC106605853	XM_014201871.1	protein delta homolog 2-like%2C transcript variant X6	-1.0528	1.27559e-19	4.7142e-18
LOC106586232	LOC106586232	XM_014173317.1	nesprin-2-like	-1.05331	2.60606e-08	1.79846e-07
LOC106562957	LOC106562957	XR_001319150.1	uncharacterized LOC106562957%2C transcript variant X2	-1.05432	1.52624e-19	5.58317e-18
LOC106574337	LOC106574337	XM_014150196.1	A disintegrin and metalloproteinase with thrombospondin motifs 5-like	-1.05476	9.00687e-17	2.30755e-15
LOC100195645	st2s2	NM_001140674.1	Cytosolic sulfotransferase 2	-1.05482	2.90393e-05	0.000112301
LOC106608564	sorcs2	XM_014206535.1	sortilin-related VPS10 domain containing receptor 2%2C transcript variant X3	-1.05531	7.66014e-20	2.8903e-18
LOC106583476	LOC106583476	XM_014167701.1	low-density lipoprotein receptor class A domain-containing protein 2-like%2C transcript variant X6	-1.0556	2.71415e-12	3.58396e-11
LOC106611108	LOC106611108	XM_014210975.1	homeobox protein Meis2-like%2C transcript variant X2	-1.05615	1.39445e-13	2.24684e-12
LOC106567151	LOC106567151	XM_014136138.1	CDP-diacylglycerol--serine O-phosphatidyltransferase-like%2C transcript variant X5	-1.05622	1.29206e-22	6.88003e-21
LOC106578660	LOC106578660	XM_014157709.1	DNA topoisomerase 2-binding protein 1-A-like%2C transcript variant X3	-1.0571	0.00236675	0.00578922
LOC106572940	LOC106572940	XM_014147533.1	nociceptin receptor-like%2C transcript variant X2	-1.05747	6.38452e-09	4.91163e-08
LOC106572876	LOC106572876	XM_014147420.1	dnaJ homolog subfamily C member 5-like	-1.05844	1.64156e-05	6.67678e-05
LOC100194762	mettl22	NM_001139791.1	methyltransferase like 22	-1.05869	1.55261e-86	3.49298e-83
LOC106573563	tmprss9	XM_014148710.1	transmembrane protease%2C serine 9%2C transcript variant X3	-1.05915	1.82572e-05	7.35109e-05
LOC106595864	LOC106595864	XM_014187212.1	mucin-5AC-like	-1.06015	0.000187565	0.000600249
LOC106599549	LOC106599549	XM_014190836.1	fibroblast growth factor receptor substrate 2-like	-1.06262	2.01043e-08	1.41425e-07
LOC106604731	LOC106604731	XM_014199696.1	glycerophosphoinositol inositolphosphodiesterase GDPD2-like%2C transcript variant X3	-1.06332	4.38492e-11	4.821e-10
LOC106572662	LOC106572662	XM_014147034.1	low-density lipoprotein receptor-related protein 1-like	-1.06469	5.81603e-07	3.16436e-06
LOC106602956	LOC106602956	XM_014196010.1	phosphorylase b kinase regulatory subunit alpha%2C skeletal muscle isoform-like	-1.06549	1.21496e-05	5.08767e-05
LOC106574877	LOC106574877	XM_014151011.1	protein S100-A5-like	-1.06642	4.02166e-30	5.02652e-28
LOC106595706	LOC106595706	XM_014187064.1	ubiquitin thioesterase zranb1-B-like	-1.06731	2.09767e-26	1.6968e-24
LOC106590085	LOC106590085	XM_014180633.1	tubulin beta-5 chain	-1.06829	1.16855e-14	2.18283e-13
LOC106570645	epb41	XM_014143115.1	erythrocyte membrane protein band 4.1%2C transcript variant X2	-1.06856	3.83432e-09	3.06562e-08
LOC106612643	LOC106612643	XM_014214000.1	immunoglobulin superfamily member 11-like%2C transcript variant X2	-1.06905	9.28014e-09	6.91181e-08
LOC106570754	LOC106570754	XM_014143241.1	type 2 phosphatidylinositol 4%2C5-bisphosphate 4-phosphatase%2C transcript variant X2	-1.07031	1.04488e-06	5.40163e-06
LOC106580496	add2	XM_014161637.1	adducin 2 (beta)%2C transcript variant X3	-1.07197	5.52324e-06	2.4796e-05
LOC106570432	LOC106570432	XM_014142758.1	ATP-dependent DNA helicase Q4-like%2C transcript variant X1	-1.07332	1.43375e-29	1.69767e-27
LOC106585120	LOC106585120	XM_014170969.1	substance-P receptor-like	-1.07375	9.31983e-06	3.9971e-05
LOC106575760	LOC106575760	XR_001321839.1	IQ calmodulin-binding motif-containing protein 1-like%2C transcript variant X7	-1.07384	5.20052e-48	2.92497e-45
LOC106584761	LOC106584761	XM_014170308.1	general transcription factor IIH subunit 1-like	-1.07464	9.90613e-138	8.91453e-134
LOC106568568	LOC106568568	XM_014139014.1	YTH domain-containing protein 1-like%2C transcript variant X5	-1.07478	5.15077e-65	6.39335e-62
LOC106572495	LOC106572495	NA	NA	-1.07618	9.36423e-05	0.000321544
LOC106581024	LOC106581024	NA	NA	-1.07681	4.51451e-09	3.56135e-08
LOC106607759	LOC106607759	XM_014205068.1	lethal(3)malignant brain tumor-like protein 3	-1.07806	2.17241e-27	1.96478e-25
LOC106596474	LOC106596474	XM_014187755.1	ubiquitin carboxyl-terminal hydrolase 32-like	-1.07869	7.26092e-09	5.5245e-08
LOC106579923	LOC106579923	XM_014160327.1	ectonucleoside triphosphate diphosphohydrolase 3-like	-1.08183	4.44884e-15	8.90658e-14
LOC106574165	LOC106574165	XM_014149832.1	calmodulin-regulated spectrin-associated protein 2-like%2C transcript variant X1	-1.08295	3.7047e-16	8.58688e-15
LOC106576536	LOC106576536	XM_014153757.1	arginine-glutamic acid dipeptide repeats protein-like	-1.08421	4.04879e-19	1.40676e-17
LOC106595372	LOC106595372	XM_014186741.1	protein ADP-ribosylarginine hydrolase-like protein 1	-1.0857	1.95773e-06	9.60741e-06
LOC106582865	LOC106582865	XM_014166431.1	semaphorin-3F-like%2C transcript variant X4	-1.08587	3.08855e-26	2.44342e-24
LOC106577966	LOC106577966	XM_014156464.1	nuclear factor 7%2C brain-like	-1.08686	4.94836e-14	8.51033e-13
LOC106597358	LOC106597358	XM_014188557.1	mucin-2-like	-1.08701	0.000157078	0.000510997
LOC106588217	LOC106588217	XM_014176990.1	sperm acrosome membrane-associated protein 4-like	-1.08899	3.88274e-31	5.43825e-29
LOC106566233	LOC106566233	XM_014134119.1	plasma membrane calcium-transporting ATPase 2%2C transcript variant X10	-1.0909	7.02989e-07	3.76e-06
LOC106581037	LOC106581037	XM_014162723.1	GA-binding protein subunit beta-1-like%2C transcript variant X2	-1.09207	2.1134e-20	8.62517e-19
LOC106577459	LOC106577459	XM_014155455.1	ethanolamine-phosphate phospho-lyase-like	-1.09262	3.03133e-13	4.6373e-12
LOC106607460	LOC106607460	XM_014204436.1	sodium channel protein type 4 subunit alpha B-like%2C transcript variant X4	-1.09347	5.07544e-08	3.35037e-07
LOC106571013	LOC106571013	XM_014143633.1	E3 ubiquitin-protein ligase RNF19A-like%2C transcript variant X1	-1.0938	7.73656e-22	3.76331e-20
LOC106577139	LOC106577139	XM_014154903.1	protein ZNF365-like	-1.09405	1.26561e-08	9.21273e-08
LOC106578467	trpc1	XM_014157283.1	transient receptor potential cation channel%2C subfamily C%2C member 1	-1.09446	2.23296e-16	5.36209e-15
LOC106601246	LOC106601246	XM_014193303.1	uncharacterized LOC106601246%2C transcript variant X5	-1.0954	1.0509e-12	1.48462e-11
LOC106589947	LOC106589947	XM_014180403.1	cAMP and cAMP-inhibited cGMP 3'%2C5'-cyclic phosphodiesterase 10A-like	-1.09598	0.000495449	0.00143454
LOC106608616	LOC106608616	XM_014206661.1	peroxisome proliferator-activated receptor gamma coactivator 1-alpha-like%2C transcript variant X4	-1.09607	2.16836e-17	6.06937e-16
LOC106589614	slc16a3	XM_014179809.1	solute carrier family 16 (monocarboxylate transporter)%2C member 3%2C transcript variant X3	-1.09675	4.71607e-33	7.93269e-31
LOC106588895	LOC106588895	XM_014178419.1	potassium voltage-gated channel subfamily KQT member 4-like	-1.09998	1.6107e-10	1.61726e-09
LOC106601434	LOC106601434	XM_014193648.1	alpha-N-acetylgalactosaminide alpha-2%2C6-sialyltransferase 2-like	-1.10324	0.00266977	0.00642687
LOC106581425	LOC106581425	XM_014163482.1	P2Y purinoceptor 3-like	-1.10346	3.02305e-09	2.45472e-08
LOC106566798	LOC106566798	XM_014135205.1	WD repeat-containing protein on Y chromosome-like%2C transcript variant X4	-1.10399	2.4731e-15	5.08404e-14
LOC106560485	LOC106560485	XM_014123450.1	ficolin-1-like	-1.10433	0.000429388	0.00126122
LOC106595931	LOC106595931	XM_014187273.1	PHD finger protein 20-like protein 1	-1.10501	2.35193e-54	1.92409e-51
LOC106562311	LOC106562311	XM_014127106.1	tryptophan 5-hydroxylase 1-like	-1.10583	0.00072203	0.00201007
LOC106573576	LOC106573576	XR_001321371.1	phosphatidylinositol 4-phosphate 5-kinase type-1 gamma-like%2C transcript variant X5	-1.10654	4.85256e-24	2.95055e-22
LOC106583301	LOC106583301	XM_014167342.1	forkhead box protein O3-like	-1.1076	3.98992e-21	1.78411e-19
LOC106562623	LOC106562623	XM_014127585.1	cytochrome P450 2D15-like	-1.10811	1.05267e-07	6.56248e-07
LOC100195357	nsg1	NM_001140386.1	Neuron-specific protein family member 1	-1.10824	3.48357e-10	3.29725e-09
LOC106609456	LOC106609456	XM_014208313.1	mitogen-activated protein kinase 11-like	-1.10888	5.44654e-15	1.07427e-13
LOC106561958	LOC106561958	XM_014126444.1	prothrombin-like	-1.11206	1.08536e-48	6.6218e-46
LOC106578496	LOC106578496	XM_014157359.1	retinal-specific ATP-binding cassette transporter-like	-1.11238	3.82266e-06	1.77275e-05
LOC106602937	LOC106602937	XM_014195961.1	arylsulfatase I-like	-1.1154	2.14054e-26	1.72759e-24
LOC106568453	LOC106568453	XM_014138799.1	seizure 6-like protein	-1.11592	2.86995e-12	3.78136e-11
LOC100306812	p4r2a	NM_001165351.1	Serine/threonine-protein phosphatase 4 regulatory subunit 2-A	-1.1171	9.20082e-183	1.65596e-178
LOC106612291	LOC106612291	XM_014213321.1	PCTP-like protein	-1.11885	2.45649e-18	7.81129e-17
LOC106585953	LOC106585953	XM_014172706.1	WD repeat and FYVE domain-containing protein 3-like	-1.11927	7.5769e-09	5.7467e-08
LOC106597100	LOC106597100	XM_014188334.1	E3 ISG15--protein ligase HERC5-like%2C transcript variant X5	-1.12225	1.48739e-05	6.10142e-05
LOC106575088	LOC106575088	XM_014151268.1	parathyroid hormone 2 receptor-like%2C transcript variant X1	-1.12268	6.16316e-06	2.73719e-05
LOC106588581	LOC106588581	XM_014177726.1	protein Jumonji-like%2C transcript variant X1	-1.12373	1.84595e-39	5.23203e-37
LOC106586624	LOC106586624	XM_014174111.1	immunoglobulin superfamily member 3-like	-1.12384	1.82216e-21	8.51824e-20
LOC106611898	LOC106611898	XM_014212550.1	rootletin-like%2C transcript variant X4	-1.12482	1.51826e-12	2.08672e-11
LOC106613533	LOC106613533	XM_014215894.1	galectin-3-binding protein A-like%2C transcript variant X2	-1.12484	1.6517e-07	9.95963e-07
LOC106571970	LOC106571970	XM_014145588.1	neurexophilin-2-like	-1.12667	0.00024515	0.000762634
LOC106566115	LOC106566115	XM_014133966.1	rho GTPase-activating protein 40-like	-1.12741	1.26469e-12	1.76517e-11
LOC106595371	LOC106595371	XM_014186740.1	oxysterol-binding protein-related protein 3-like	-1.12828	1.30797e-07	8.0358e-07
LOC106607357	LOC106607357	XM_014204251.1	BAI1-associated protein 3-like	-1.131	3.19008e-10	3.03863e-09
LOC106569553	LOC106569553	XM_014141017.1	yjeF N-terminal domain-containing protein 3-like	-1.1314	2.48572e-18	7.89725e-17
LOC106590804	LOC106590804	XR_001325114.1	uncharacterized LOC106590804	-1.13282	5.55822e-09	4.32125e-08
LOC106560496	kank4	XM_014123459.1	KN motif and ankyrin repeat domains 4	-1.13645	5.5293e-14	9.45523e-13
LOC106576778	LOC106576778	XM_014154177.1	gamma-aminobutyric acid receptor subunit pi-like%2C transcript variant X3	-1.13694	0.000131381	0.000434989
LOC106584498	LOC106584498	XM_014169873.1	sodium- and chloride-dependent GABA transporter 2-like	-1.13706	1.60084e-06	7.98554e-06
LOC100286735	pss	NM_001146675.1	CDP-diacylglycerol--serine O-phosphatidyltransferase	-1.1371	2.9211e-10	2.8017e-09
LOC106589855	LOC106589855	XM_014180252.1	uncharacterized LOC106589855	-1.13786	4.32222e-16	9.87199e-15
LOC106592807	LOC106592807	XM_014184140.1	high-affinity choline transporter 1-like	-1.13811	2.8127e-16	6.65218e-15
LOC106592222	LOC106592222	XM_014183540.1	mucin-5B-like	-1.14155	6.26301e-05	0.000224086
LOC106581401	LOC106581401	XM_014163444.1	SLIT and NTRK-like protein 3%2C transcript variant X1	-1.14171	8.42861e-08	5.35374e-07
LOC106582947	LOC106582947	XM_014166590.1	guanylin-like	-1.14541	3.41213e-06	1.59676e-05
LOC106572144	sycp2	XM_014146032.1	synaptonemal complex protein 2%2C transcript variant X1	-1.14586	1.158e-24	7.57877e-23
LOC106599910	LOC106599910	XM_014191261.1	PHD finger protein 20-like protein 1	-1.14609	1.84598e-16	4.48972e-15
LOC106566872	LOC106566872	XM_014135381.1	protein polyglycylase TTLL10-like%2C transcript variant X2	-1.14645	2.96078e-10	2.83674e-09
LOC106585556	LOC106585556	XM_014171906.1	dihydropyrimidinase-related protein 2-like	-1.14813	6.95411e-19	2.35458e-17
LOC106569718	LOC106569718	XM_014141289.1	piezo-type mechanosensitive ion channel component 2-like	-1.15016	7.28147e-08	4.67541e-07
LOC106579968	LOC106579968	XM_014160434.1	stromelysin-3-like%2C transcript variant X2	-1.1502	8.30056e-34	1.50902e-31
LOC106595069	LOC106595069	XM_014186440.1	mucin-5B-like	-1.15176	4.75538e-05	0.000174921
LOC106587770	LOC106587770	XR_001324502.1	uncharacterized LOC106587770	-1.15192	6.02435e-18	1.82076e-16
LOC106585619	LOC106585619	XR_001323993.1	uncharacterized LOC106585619	-1.1536	1.51073e-09	1.28346e-08
LOC106579624	LOC106579624	XM_014159721.1	importin-4-like%2C transcript variant X2	-1.15362	2.11672e-11	2.4421e-10
LOC106613626	LOC106613626	XM_014216078.1	homer protein homolog 3-like%2C transcript variant X3	-1.15671	9.66026e-12	1.17516e-10
LOC106589682	LOC106589682	XM_014179943.1	mitochondrial cardiolipin hydrolase-like%2C transcript variant X1	-1.15889	2.69606e-13	4.15725e-12
LOC106570062	LOC106570062	XM_014142012.1	sperm acrosome membrane-associated protein 4-like	-1.1608	6.6257e-20	2.52915e-18
LOC106567218	LOC106567218	XR_001320019.1	tumor protein D54-like%2C transcript variant X2	-1.16459	8.02277e-10	7.16773e-09
LOC106589123	LOC106589123	XM_014178821.1	protein FAM91A1-like	-1.16466	1.13564e-10	1.16762e-09
LOC106604515	LOC106604515	XM_014199189.1	elongation of very long chain fatty acids protein 6%2C transcript variant X1	-1.16487	2.50676e-47	1.32696e-44
LOC106567084	LOC106567084	XM_014135962.1	nck-associated protein 5-like%2C transcript variant X1	-1.16517	0.00106467	0.00284831
LOC106566558	top1	XM_014134671.1	topoisomerase (DNA) I	-1.1655	1.21931e-59	1.25401e-56
LOC106613461	LOC106613461	NA	NA	-1.16572	6.59814e-06	2.91312e-05
LOC106599329	LOC106599329	XM_014190503.1	fish-egg lectin-like	-1.16729	0.00106195	0.00284143
LOC100194720	LOC100194720	XM_014194811.1	uncharacterized LOC100194720	-1.17053	2.8422e-05	0.000110151
LOC106583557	LOC106583557	XM_014167875.1	fibroblast growth factor receptor substrate 2-like%2C transcript variant X1	-1.1759	6.48806e-16	1.4452e-14
LOC106609544	LOC106609544	XM_014208510.1	uncharacterized LOC106609544	-1.17801	1.03524e-19	3.8576e-18
LOC106587434	LOC106587434	XM_014175827.1	DNA-binding protein RFX7-like%2C transcript variant X1	-1.17805	2.2725e-39	6.34116e-37
LOC106565186	LOC106565186	XM_014132029.1	DDB1- and CUL4-associated factor 12-like%2C transcript variant X1	-1.1785	3.95887e-25	2.74045e-23
LOC106610076	LOC106610076	XM_014209230.1	fascin-2-like	-1.18183	0.000409945	0.00120964
LOC106593043	LOC106593043	XM_014184386.1	protein asteroid homolog 1-like	-1.1823	2.16363e-06	1.05374e-05
LOC106585976	LOC106585976	XM_014172734.1	AT-rich interactive domain-containing protein 3A-like%2C transcript variant X2	-1.18451	1.94851e-06	9.56479e-06
LOC106602768	LOC106602768	XM_014195612.1	early growth response protein 4-like	-1.18544	8.26202e-32	1.22892e-29
LOC106594241	LOC106594241	XM_014185617.1	voltage-dependent T-type calcium channel subunit alpha-1I-like	-1.1864	3.34299e-08	2.27389e-07
LOC106569572	LOC106569572	XM_014141063.1	supervillin-like%2C transcript variant X11	-1.19033	6.56786e-18	1.96523e-16
LOC106606601	LOC106606601	XR_001329087.1	uncharacterized LOC106606601	-1.19265	4.59294e-11	5.02668e-10
LOC106591675	LOC106591675	XM_014182900.1	mucin-5AC-like	-1.19273	4.52322e-05	0.000167302
LOC106596243	LOC106596243	XM_014187550.1	ankyrin repeat and fibronectin type-III domain-containing protein 1-like	-1.19297	7.28444e-33	1.17058e-30
LOC106613188	LOC106613188	XM_014215199.1	neuronal acetylcholine receptor subunit alpha-9-like%2C transcript variant X3	-1.19721	5.58363e-11	6.02483e-10
LOC106593068	LOC106593068	XM_014184411.1	protein asteroid homolog 1-like	-1.19774	1.36969e-06	6.91783e-06
LOC106567010	LOC106567010	XM_014135775.1	rho-related GTP-binding protein Rho6-like	-1.20053	8.36588e-15	1.60265e-13
LOC106566179	sp7	XM_014134053.1	Sp7 transcription factor	-1.20158	9.56552e-21	4.10884e-19
LOC106567759	LOC106567759	XR_001320168.1	uncharacterized LOC106567759%2C transcript variant X10	-1.20218	6.71199e-22	3.28714e-20
LOC106604002	LOC106604002	XM_014198322.1	rho-related BTB domain-containing protein 1-like%2C transcript variant X2	-1.20242	7.34951e-09	5.58836e-08
LOC106601797	LOC106601797	XR_001328090.1	uncharacterized LOC106601797	-1.20307	1.68047e-10	1.68169e-09
LOC106579309	LOC106579309	XM_014159119.1	tubulin polyglutamylase ttll6-like%2C transcript variant X1	-1.20502	2.63336e-13	4.06652e-12
LOC106573035	LOC106573035	XR_001321238.1	uncharacterized LOC106573035	-1.20649	1.03151e-07	6.44401e-07
LOC106602918	LOC106602918	XM_014195923.1	rho GTPase-activating protein 24-like%2C transcript variant X3	-1.20721	1.56145e-19	5.69229e-18
LOC106597382	LOC106597382	XM_014188581.1	protein Jumonji-like	-1.2073	1.18418e-22	6.33371e-21
LOC106570431	LOC106570431	XM_014142757.1	uncharacterized LOC106570431	-1.20742	8.09869e-33	1.28991e-30
LOC106561849	LOC106561849	XR_001318920.1	uncharacterized LOC106561849%2C transcript variant X1	-1.20932	9.71725e-06	4.15073e-05
LOC106581812	LOC106581812	XM_014164366.1	uncharacterized protein C15orf52-like%2C transcript variant X3	-1.21112	4.15854e-20	1.62531e-18
LOC106573598	LOC106573598	XM_014148790.1	chromatin target of PRMT1 protein-like%2C transcript variant X2	-1.21167	5.7474e-18	1.74144e-16
LOC106569132	ccdc178	XM_014140137.1	coiled-coil domain containing 178%2C transcript variant X4	-1.21212	5.06196e-47	2.64073e-44
LOC106598936	LOC106598936	XM_014189964.1	mucin-2-like	-1.21214	5.103e-06	2.30792e-05
LOC106577443	LOC106577443	XM_014155422.1	uncharacterized LOC106577443%2C transcript variant X8	-1.21365	1.06796e-15	2.30884e-14
LOC106597485	LOC106597485	XR_001326942.1	uncharacterized LOC106597485%2C transcript variant X2	-1.21415	4.06009e-06	1.87464e-05
LOC106563133	LOC106563133	XM_014128378.1	collagen alpha-1(I) chain-like	-1.21416	1.56771e-15	3.3041e-14
LOC106572804	LOC106572804	XR_001321192.1	uncharacterized LOC106572804	-1.21486	2.56864e-08	1.77536e-07
LOC106573666	LOC106573666	XM_014148932.1	carbohydrate sulfotransferase 6-like%2C transcript variant X10	-1.21487	5.02392e-20	1.93413e-18
LOC106610632	LOC106610632	XM_014210063.1	MAPK/MAK/MRK overlapping kinase-like%2C transcript variant X4	-1.21621	9.93852e-23	5.36352e-21
LOC106578144	LOC106578144	XR_001322361.1	zinc finger protein 771-like%2C transcript variant X2	-1.21683	1.01422e-26	8.56991e-25
LOC106597518	LOC106597518	XM_014188697.1	mucin-2-like	-1.21717	1.59372e-05	6.5072e-05
LOC106605443	LOC106605443	XM_014201109.1	mediator of DNA damage checkpoint protein 1-like%2C transcript variant X1	-1.21842	1.25903e-05	5.25208e-05
LOC106613245	LOC106613245	XM_014215316.1	neuroserpin-like	-1.22002	4.39821e-17	1.17621e-15
LOC106588596	LOC106588596	XM_014177752.1	CMP-N-acetylneuraminate-beta-galactosamide-alpha-2%2C3-sialyltransferase 1-like%2C transcript variant X2	-1.2201	6.87914e-21	2.98699e-19
LOC106608460	LOC106608460	XM_014206390.1	protein phosphatase 1 regulatory subunit 14B-like%2C transcript variant X1	-1.22017	3.77832e-28	3.82035e-26
LOC106579714	LOC106579714	XM_014159861.1	extracellular sulfatase Sulf-1-like	-1.22071	2.39347e-11	2.73944e-10
LOC106568881	LOC106568881	XM_014139658.1	epidermal retinol dehydrogenase 2-like	-1.22109	8.70298e-44	3.86756e-41
LOC106594757	LOC106594757	XM_014186142.1	mucin-5AC-like	-1.22274	3.56908e-05	0.000134837
LOC106602893	LOC106602893	NA	NA	-1.22581	1.59288e-10	1.60205e-09
LOC106572556	LOC106572556	XM_014146837.1	ATP-dependent RNA helicase DDX19A-like%2C transcript variant X2	-1.2261	1.8721e-24	1.1906e-22
LOC106584950	LOC106584950	XR_001323867.1	uncharacterized LOC106584950	-1.22678	2.05961e-11	2.37926e-10
LOC106596831	LOC106596831	XM_014188090.1	intestinal mucin-like protein	-1.2273	0.00228398	0.00560806
LOC106600778	LOC106600778	XM_014192431.1	cell wall protein IFF6-like	-1.22733	5.41517e-05	0.000196576
LOC106588935	ppp1r9a	XM_014178494.1	protein phosphatase 1%2C regulatory subunit 9A%2C transcript variant X1	-1.22766	9.82194e-22	4.71401e-20
LOC106597229	LOC106597229	XM_014188440.1	mucin-5AC-like	-1.22916	0.0031889	0.00753595
LOC106591139	LOC106591139	XM_014182329.1	mucin-5AC-like	-1.23275	5.8543e-05	0.000211048
LOC106592223	LOC106592223	XM_014183541.1	kinesin-like protein KIF13A	-1.23403	1.71352e-07	1.03006e-06
LOC106593294	LOC106593294	XM_014184632.1	mucin-5B-like	-1.23672	2.17606e-05	8.63516e-05
LOC106609213	LOC106609213	XM_014207740.1	uncharacterized LOC106609213%2C transcript variant X1	-1.2388	6.20674e-10	5.65186e-09
LOC106610613	LOC106610613	XM_014210022.1	serine/threonine-protein kinase WNK4-like	-1.2396	2.326e-15	4.80359e-14
LOC106565648	LOC106565648	XM_014132980.1	transmembrane protein 88B-like%2C transcript variant X3	-1.24206	1.50769e-10	1.51934e-09
LOC106604355	LOC106604355	XM_014198909.1	vascular endothelial growth factor A-A-like	-1.24357	9.0488e-25	6.00961e-23
LOC106600566	LOC106600566	XM_014192023.1	uncharacterized LOC106600566	-1.24368	1.56239e-19	5.69229e-18
LOC106595693	LOC106595693	XR_001326442.1	uncharacterized LOC106595693	-1.24487	4.48798e-07	2.49497e-06
LOC106563491	LOC106563491	XM_014129138.1	uncharacterized oxidoreductase Mvan_2161-like%2C transcript variant X1	-1.2457	6.09953e-26	4.63204e-24
LOC106564532	LOC106564532	XM_014130661.1	nuclear factor interleukin-3-regulated protein-like%2C transcript variant X2	-1.24663	1.30454e-16	3.24746e-15
LOC106609755	LOC106609755	NA	NA	-1.24979	5.42115e-06	2.43955e-05
LOC106576605	LOC106576605	XM_014153849.1	fish-egg lectin-like	-1.25181	0.00010956	0.000369885
LOC106606659	LOC106606659	XM_014202999.1	tectonin beta-propeller repeat-containing protein 1-like%2C transcript variant X1	-1.25206	8.21133e-24	4.87748e-22
LOC106593368	LOC106593368	XM_014184705.1	FYVE%2C RhoGEF and PH domain-containing protein 1-like	-1.25295	5.13063e-06	2.31926e-05
LOC106561839	LOC106561839	XM_014126102.1	myelin regulatory factor-like	-1.25316	0.000779101	0.0021523
LOC106611505	LOC106611505	XM_014211771.1	glycine receptor subunit alpha-4%2C transcript variant X1	-1.25473	1.47306e-10	1.48611e-09
LOC106575321	LOC106575321	XM_014151787.1	hemopexin-like	-1.25648	1.41763e-05	5.84592e-05
LOC106573425	LOC106573425	XM_014148461.1	phosphatidylinositol phosphatase PTPRQ-like	-1.25943	6.69367e-31	9.09227e-29
LOC106575210	LOC106575210	XM_014151558.1	double-stranded RNA-specific editase 1-like%2C transcript variant X2	-1.26104	3.36632e-42	1.26223e-39
LOC106584858	LOC106584858	XR_001323850.1	uncharacterized LOC106584858	-1.26179	5.97634e-06	2.66309e-05
LOC106604283	LOC106604283	XR_001328642.1	uncharacterized LOC106604283	-1.26461	1.30432e-22	6.93503e-21
LOC106562084	LOC106562084	XM_014126647.1	nuclear mitotic apparatus protein 1-like%2C transcript variant X4	-1.27006	1.35271e-28	1.43212e-26
LOC106563132	LOC106563132	XM_014128377.1	collagen alpha-2(V) chain-like	-1.2708	2.37881e-23	1.35059e-21
LOC106597407	LOC106597407	XM_014188601.1	mucin-2-like	-1.27106	3.64649e-05	0.000137499
LOC106610665	LOC106610665	XM_014210152.1	MAM domain-containing glycosylphosphatidylinositol anchor protein 2-like%2C transcript variant X1	-1.27251	1.84712e-19	6.66223e-18
LOC106586421	LOC106586421	XM_014173655.1	sterol 26-hydroxylase%2C mitochondrial-like	-1.27359	1.16145e-26	9.72272e-25
LOC106603895	LOC106603895	XM_014198111.1	actin-binding LIM protein 3-like%2C transcript variant X4	-1.27391	1.15949e-14	2.16704e-13
LOC106586196	LOC106586196	XM_014173194.1	sodium channel protein type 2 subunit alpha-like%2C transcript variant X6	-1.27427	6.32984e-11	6.74708e-10
LOC106604542	LOC106604542	XM_014199280.1	fibroblast growth factor-binding protein 1-like	-1.27813	2.96385e-12	3.89652e-11
LOC106575100	LOC106575100	XM_014151292.1	ATP-binding cassette sub-family B member 6%2C mitochondrial-like	-1.28019	7.29324e-41	2.36511e-38
LOC106611586	elovl6	XM_014211954.1	ELOVL fatty acid elongase 6	-1.281	3.15145e-25	2.21562e-23
LOC106600112	LOC106600112	XR_001327700.1	uncharacterized LOC106600112	-1.28221	1.44923e-15	3.07949e-14
LOC106591145	LOC106591145	XM_014182333.1	intestinal mucin-like protein	-1.28262	0.00209056	0.00518728
LOC106564238	LOC106564238	XR_001319441.1	uncharacterized LOC106564238	-1.28376	6.10995e-61	6.87293e-58
LOC106599263	LOC106599263	XM_014190404.1	regulator of G-protein signaling protein-like	-1.28875	2.43619e-09	2.00624e-08
LOC106580934	LOC106580934	XR_001322996.1	uncharacterized LOC106580934	-1.28984	8.41682e-09	6.3106e-08
LOC106597926	LOC106597926	XM_014189034.1	mucin-5B-like	-1.29272	0.00093613	0.00253627
LOC106567283	LOC106567283	XM_014136408.1	serine/threonine-protein phosphatase 4 regulatory subunit 2-A-like	-1.29272	9.14081e-196	3.29033e-191
LOC106571874	LOC106571874	NA	NA	-1.29304	1.13348e-06	5.82037e-06
LOC106563541	LOC106563541	NA	NA	-1.29439	2.86551e-17	7.88078e-16
LOC100380588	tbb2a	NM_001173873.1	Tubulin beta-2A chain	-1.30064	4.85658e-21	2.14764e-19
LOC106567140	LOC106567140	XM_014136099.1	ATP-dependent RNA helicase DDX19B%2C transcript variant X3	-1.30239	1.55629e-36	3.45803e-34
LOC106604485	nkx3-2	XM_014199143.1	NK3 homeobox 2	-1.30325	4.77857e-05	0.000175699
LOC106602145	LOC106602145	XM_014194615.1	high-affinity choline transporter 1-like	-1.3046	7.0618e-16	1.56639e-14
LOC106591914	LOC106591914	XR_001325522.1	uncharacterized LOC106591914	-1.30576	1.29534e-13	2.09653e-12
LOC106599078	LOC106599078	XM_014190154.1	potassium voltage-gated channel subfamily H member 5-like%2C transcript variant X2	-1.30645	7.27163e-13	1.05332e-11
LOC106606589	LOC106606589	XM_014202887.1	tectonin beta-propeller repeat-containing protein 1-like	-1.30816	9.97963e-28	9.47828e-26
LOC106608578	LOC106608578	XM_014206592.1	interferon-induced protein with tetratricopeptide repeats 5-like	-1.31167	1.68265e-06	8.35543e-06
LOC106569508	LOC106569508	XM_014140924.1	glutamate decarboxylase 1-like%2C transcript variant X7	-1.31183	1.14407e-05	4.81662e-05
LOC106605377	LOC106605377	XM_014200922.1	neural-cadherin-like	-1.3135	6.62697e-14	1.11678e-12
LOC106586173	LOC106586173	XM_014173114.1	uridine phosphorylase 2-like	-1.31647	7.77025e-11	8.19027e-10
LOC106599092	LOC106599092	XM_014190155.1	rab effector MyRIP-like	-1.31868	2.18762e-08	1.52964e-07
LOC106607487	LOC106607487	XR_001329208.1	uncharacterized LOC106607487	-1.32044	8.59816e-08	5.45277e-07
LOC106589931	LOC106589931	XM_014180383.1	cadherin-related family member 1-like	-1.32576	1.16927e-09	1.01517e-08
LOC106569122	LOC106569122	XM_014140114.1	suppression of tumorigenicity 18 protein-like%2C transcript variant X7	-1.32578	3.22497e-10	3.07025e-09
LOC106584850	LOC106584850	XM_014170455.1	dnaJ homolog subfamily A member 4-like	-1.32597	1.00196e-21	4.79607e-20
LOC106579380	LOC106579380	XM_014159222.1	vesicular glutamate transporter 1-like	-1.32749	0.00169049	0.00429101
LOC106577912	LOC106577912	XM_014156364.1	tudor domain-containing protein 7B-like%2C transcript variant X4	-1.33038	3.32355e-20	1.31901e-18
LOC106611790	LOC106611790	XM_014212376.1	E3 ubiquitin-protein ligase RNF38-like	-1.33238	3.39004e-92	1.10934e-88
LOC106590484	LOC106590484	XM_014181559.1	otospiralin-like	-1.33362	6.34063e-42	2.28237e-39
LOC100196869	LOC100196869	XM_014183289.1	PHD finger protein 20-like protein 1%2C transcript variant X3	-1.33369	4.28545e-83	8.56995e-80
LOC106603149	LOC106603149	XM_014196441.1	uncharacterized LOC106603149%2C transcript variant X7	-1.33403	2.83674e-24	1.76969e-22
LOC106593035	LOC106593035	XM_014184382.1	calmodulin-regulated spectrin-associated protein 3-like	-1.33929	1.23164e-12	1.72238e-11
LOC106590415	LOC106590415	XR_001325046.1	uncharacterized LOC106590415	-1.34142	1.82662e-59	1.82641e-56
LOC106610165	LOC106610165	XM_014209369.1	extensin-1-like%2C transcript variant X4	-1.3427	4.67013e-06	2.13035e-05
LOC106604592	adad1	XM_014199379.1	adenosine deaminase domain containing 1 (testis-specific)%2C transcript variant X1	-1.34377	4.47177e-26	3.4542e-24
LOC100194813	bmcc1	NM_001139842.1	BNIP2 motif-containing molecule at the C-terminal region 1	-1.3467	1.22751e-13	1.99214e-12
LOC106573319	LOC106573319	XR_001321311.1	uncharacterized LOC106573319%2C transcript variant X1	-1.34919	7.7564e-57	6.97999e-54
LOC106604034	LOC106604034	XM_014198369.1	mothers against decapentaplegic homolog 9-like	-1.35001	3.93285e-05	0.000147235
LOC106600894	prkd1	XM_014192691.1	protein kinase D1%2C transcript variant X5	-1.35996	5.35376e-19	1.83537e-17
LOC106611648	LOC106611648	XM_014212073.1	probable carboxypeptidase X1%2C transcript variant X2	-1.36835	1.99891e-41	6.72457e-39
LOC106601007	LOC106601007	NA	NA	-1.377	1.69329e-19	6.15674e-18
LOC106590936	LOC106590936	XM_014182108.1	fish-egg lectin-like	-1.37968	1.49153e-07	9.07675e-07
LOC106611739	LOC106611739	XM_014212262.1	phosphatidylinositol 3%2C4%2C5-trisphosphate 5-phosphatase 2B-like%2C transcript variant X1	-1.38025	2.18523e-50	1.45666e-47
LOC106574051	axdnd1	XM_014149578.1	axonemal dynein light chain domain containing 1%2C transcript variant X2	-1.384	5.30293e-31	7.28566e-29
LOC106568517	LOC106568517	XM_014138939.1	potassium/sodium hyperpolarization-activated cyclic nucleotide-gated channel 1-like	-1.3879	7.02519e-11	7.44637e-10
LOC106581239	LOC106581239	XM_014163162.1	seizure protein 6 homolog%2C transcript variant X1	-1.40174	6.76064e-11	7.18401e-10
LOC106597354	LOC106597354	XM_014188551.1	mucin-2-like	-1.40447	2.31144e-07	1.35885e-06
LOC106578743	LOC106578743	XM_014157881.1	uncharacterized LOC106578743	-1.40614	2.08447e-13	3.2751e-12
LOC106589594	LOC106589594	XM_014179759.1	monocarboxylate transporter 7-like%2C transcript variant X3	-1.41047	7.76379e-08	4.9577e-07
LOC106583790	slc6a1	XM_014168363.1	solute carrier family 6 (neurotransmitter transporter)%2C member 1	-1.41424	1.20304e-06	6.13901e-06
LOC106611657	LOC106611657	XM_014212096.1	beta-crystallin A1-2-like	-1.41511	0.000640726	0.00180551
LOC106583993	LOC106583993	NA	NA	-1.41839	9.41056e-14	1.55387e-12
LOC106572237	LOC106572237	XM_014146253.1	ephrin type-B receptor 2-like%2C transcript variant X1	-1.4193	1.12621e-13	1.83768e-12
LOC106582973	LOC106582973	XM_014166618.1	draxin-B%2C transcript variant X1	-1.42289	2.27619e-24	1.43996e-22
LOC106592150	LOC106592150	XM_014183461.1	mucin-5B-like	-1.42333	2.38303e-07	1.39774e-06
LOC106596806	LOC106596806	XM_014188073.1	GTP-binding protein Rheb-like	-1.42419	3.28935e-16	7.69353e-15
LOC106593193	LOC106593193	XM_014184527.1	high affinity choline transporter 1-like	-1.42613	1.28553e-15	2.75276e-14
LOC106611368	LOC106611368	XR_001330096.1	type II iodothyronine deiodinase-like%2C transcript variant X2	-1.42896	3.56491e-20	1.40859e-18
LOC106588022	LOC106588022	XM_014176685.1	sodium/hydrogen exchanger 5-like	-1.43365	2.17333e-08	1.52023e-07
LOC106602853	LOC106602853	XM_014195788.1	F-box only protein 40-like%2C transcript variant X2	-1.43563	2.51998e-49	1.56395e-46
LOC106604412	LOC106604412	XR_001328667.1	uncharacterized LOC106604412	-1.4394	1.64435e-15	3.45333e-14
LOC106574125	ankub1	XM_014149742.1	ankyrin repeat and ubiquitin domain containing 1	-1.44235	2.98895e-07	1.72282e-06
LOC106586079	LOC106586079	NA	NA	-1.44553	5.8215e-10	5.3199e-09
LOC106565060	LOC106565060	XR_001319599.1	uncharacterized LOC106565060%2C transcript variant X2	-1.4495	1.37376e-11	1.63363e-10
LOC106570180	LOC106570180	XM_014142219.1	extracellular matrix protein 1-like	-1.45124	5.40828e-09	4.21469e-08
LOC106566792	LOC106566792	XM_014135182.1	protein bassoon-like%2C transcript variant X1	-1.45472	5.08801e-14	8.72965e-13
LOC106579862	LOC106579862	XM_014160163.1	ectonucleoside triphosphate diphosphohydrolase 4-like%2C transcript variant X5	-1.4565	6.76543e-36	1.43252e-33
LOC106593663	LOC106593663	XR_001325924.1	CD82 antigen-like	-1.46056	6.16602e-11	6.59198e-10
LOC106574464	adprhl1	XM_014150360.1	ADP-ribosylhydrolase like 1	-1.46189	1.19602e-09	1.03615e-08
LOC106577091	LOC106577091	XM_014154814.1	interferon-induced protein with tetratricopeptide repeats 1-like	-1.4633	9.91464e-11	1.02731e-09
LOC100286820	ll	NM_001159373.1	leukolectin protein	-1.46534	2.29416e-07	1.3498e-06
LOC106609386	LOC106609386	XM_014208169.1	poly [ADP-ribose] polymerase 12-like	-1.46562	7.54581e-17	1.95269e-15
LOC106581449	LOC106581449	XM_014163513.1	voltage-gated potassium channel subunit beta-1-like%2C transcript variant X1	-1.46844	5.0824e-14	8.72418e-13
LOC106597903	LOC106597903	XM_014189016.1	mucin-5AC-like	-1.47965	1.51376e-05	6.20538e-05
LOC106568016	LOC106568016	XM_014138005.1	histone-lysine N-methyltransferase%2C H3 lysine-36 and H4 lysine-20 specific-like%2C transcript variant X4	-1.48028	2.25907e-18	7.22822e-17
LOC106569812	LOC106569812	XM_014141445.1	myosin heavy chain%2C fast skeletal muscle-like	-1.4826	1.17218e-05	4.92689e-05
LOC106609743	LOC106609743	XR_001329751.1	uncharacterized LOC106609743	-1.48445	1.17343e-07	7.26e-07
LOC106606842	LOC106606842	XM_014203225.1	acid-sensing ion channel 2	-1.48574	0.00053422	0.00153494
LOC106608908	LOC106608908	XM_014207119.1	kelch-like protein 33	-1.48792	8.10876e-06	3.51666e-05
LOC106607170	LOC106607170	XM_014203826.1	uncharacterized LOC106607170%2C transcript variant X3	-1.49103	9.86262e-25	6.51404e-23
LOC106566599	dnah12	XM_014134759.1	dynein%2C axonemal%2C heavy chain 12%2C transcript variant X3	-1.49194	1.98192e-44	9.2651e-42
LOC106601292	LOC106601292	XM_014193396.1	ankyrin repeat and fibronectin type-III domain-containing protein 1-like	-1.49269	3.71513e-33	6.36809e-31
LOC106566407	LOC106566407	XM_014134397.1	copine-5-like%2C transcript variant X3	-1.49675	1.24161e-23	7.25536e-22
LOC106578061	LOC106578061	XM_014156629.1	uncharacterized LOC106578061	-1.49703	8.075e-15	1.55106e-13
LOC106581150	LOC106581150	XM_014163005.1	rho GTPase-activating protein 32-like%2C transcript variant X6	-1.50252	1.0483e-57	9.8483e-55
LOC106580611	LOC106580611	XM_014161854.1	neural-cadherin-like	-1.5038	5.5929e-33	9.32046e-31
LOC106585414	LOC106585414	XR_001323964.1	uncharacterized LOC106585414%2C transcript variant X2	-1.50475	2.09597e-17	5.88506e-16
LOC106607819	LOC106607819	XM_014205197.1	gap junction epsilon-1 protein-like%2C transcript variant X4	-1.50548	8.01938e-15	1.54284e-13
LOC106568183	LOC106568183	XM_014138291.1	netrin receptor UNC5C-like%2C transcript variant X1	-1.50612	5.1377e-26	3.94322e-24
LOC106569437	rnf212b	XM_014140792.1	ring finger protein 212B%2C transcript variant X4	-1.50626	9.4571e-19	3.1346e-17
LOC106594859	LOC106594859	XM_014186245.1	ADP-ribosylation factor 4-like	-1.5072	0.000790244	0.00218074
LOC106583468	LOC106583468	XM_014167677.1	solute carrier family 25 member 34-like%2C transcript variant X1	-1.51565	8.55625e-91	2.36916e-87
LOC106595905	LOC106595905	XM_014187246.1	FYVE%2C RhoGEF and PH domain-containing protein 1-like	-1.51605	3.99594e-07	2.24571e-06
LOC106608902	LOC106608902	XM_014207114.1	proline-%2C glutamic acid- and leucine-rich protein 1-like	-1.51753	7.48271e-15	1.445e-13
LOC106606694	LOC106606694	XM_014203045.1	delphilin-like	-1.51978	7.70929e-10	6.91511e-09
LOC100137726	tyrp-1b	XM_014206938.1	tyrosinase-related protein 1b	-1.52231	3.95175e-12	5.09481e-11
LOC106603079	LOC106603079	XM_014196250.1	gamma-aminobutyric acid receptor subunit rho-3-like	-1.52302	2.33312e-11	2.67717e-10
LOC106612366	LOC106612366	XM_014213438.1	coagulation factor IX-like%2C transcript variant X2	-1.52351	2.60473e-45	1.28438e-42
LOC106579986	LOC106579986	XM_014160481.1	nuclear receptor subfamily 6 group A member 1-A-like%2C transcript variant X4	-1.52552	1.2869e-31	1.89075e-29
LOC106572346	uhrf1bp1	XM_014146392.1	UHRF1 binding protein 1%2C transcript variant X2	-1.53228	7.0369e-44	3.16625e-41
LOC106567418	LOC106567418	XM_014136640.1	teneurin-2-like%2C transcript variant X11	-1.53237	1.2291e-33	2.21214e-31
LOC106584331	LOC106584331	XM_014169503.1	ELAV-like protein 4%2C transcript variant X7	-1.54531	9.43911e-09	7.0215e-08
LOC100137092	LOC100137092	XM_014173392.1	dopachrome tautomerase-like	-1.54725	3.9799e-25	2.74972e-23
LOC100195783	fel	NM_001140812.1	Fish-egg lectin	-1.54786	2.5485e-10	2.47266e-09
LOC106580737	sptbn4	XM_014162095.1	spectrin%2C beta%2C non-erythrocytic 4%2C transcript variant X7	-1.55122	2.78352e-39	7.5335e-37
LOC106585332	LOC106585332	XM_014171423.1	tumor necrosis factor ligand superfamily member 15-like	-1.55477	3.3865e-09	2.73075e-08
LOC106609375	LOC106609375	XM_014208151.1	thioredoxin reductase 1%2C cytoplasmic-like%2C transcript variant X1	-1.55641	5.62269e-11	6.06515e-10
LOC106561282	cfap44	XM_014125056.1	cilia and flagella associated protein 44	-1.56479	2.84957e-73	4.66241e-70
LOC106593461	LOC106593461	XM_014184795.1	N-acetyllactosaminide beta-1%2C3-N-acetylglucosaminyltransferase 2-like	-1.56724	9.60938e-28	9.15078e-26
LOC106560234	LOC106560234	XM_014122884.1	collagen alpha-1(IX) chain-like	-1.56831	4.90302e-12	6.2166e-11
LOC106576140	LOC106576140	XM_014153055.1	branched-chain-amino-acid aminotransferase%2C cytosolic-like%2C transcript variant X2	-1.56999	5.54387e-05	0.000200782
LOC106607990	LOC106607990	XR_001329357.1	uncharacterized LOC106607990	-1.57499	3.06216e-16	7.19957e-15
LOC106580910	LOC106580910	XR_001322982.1	uncharacterized LOC106580910	-1.5789	0.00118666	0.00313735
LOC106577394	LOC106577394	XM_014155365.1	acyl-CoA desaturase-like	-1.5813	6.99281e-23	3.83125e-21
LOC106612628	LOC106612628	XM_014213970.1	membrane frizzled-related protein-like%2C transcript variant X1	-1.58291	1.13985e-08	8.35639e-08
LOC106576863	LOC106576863	XM_014154360.1	mitogen-activated protein kinase 8-like%2C transcript variant X2	-1.58841	2.12138e-13	3.32584e-12
LOC106566415	LOC106566415	XM_014134421.1	copine-5-like	-1.58933	7.86949e-42	2.80466e-39
LOC106613137	LOC106613137	XM_014215097.1	sphingosine-1-phosphate phosphatase 2-like%2C transcript variant X1	-1.59107	2.08558e-14	3.7555e-13
LOC106603248	LOC106603248	XM_014196629.1	protocadherin-10-like%2C transcript variant X5	-1.59443	3.52477e-23	1.96709e-21
LOC106601521	LOC106601521	XM_014193763.1	glial fibrillary acidic protein-like	-1.59998	3.0686e-20	1.22458e-18
LOC106560589	LOC106560589	XM_014123621.1	histidine-rich glycoprotein-like	-1.60128	1.78261e-27	1.63691e-25
LOC106573600	LOC106573600	XM_014148779.1	duodenase-1-like%2C transcript variant X1	-1.60272	2.00034e-128	1.02863e-124
LOC106594674	LOC106594674	XM_014186070.1	calmodulin-regulated spectrin-associated protein 3-like	-1.60392	3.47435e-09	2.79783e-08
LOC106592405	LOC106592405	XM_014183744.1	cytosolic carboxypeptidase-like protein 5	-1.60563	3.09551e-17	8.47991e-16
LOC106613016	LOC106613016	XM_014214844.1	roundabout homolog 2-like	-1.60718	4.2695e-28	4.28091e-26
LOC106587320	LOC106587320	XM_014175601.1	putative leucine-rich repeat-containing protein DDB_G0290503	-1.6129	8.06514e-13	1.16079e-11
LOC106575301	LOC106575301	XM_014151743.1	sodium channel protein type 2 subunit alpha-like%2C transcript variant X1	-1.61354	2.39841e-11	2.74422e-10
LOC106611717	LOC106611717	XM_014212217.1	dystrophin-related protein 2-like%2C transcript variant X1	-1.6193	1.88388e-20	7.7677e-19
LOC106599713	LOC106599713	XM_014191012.1	tubulin beta-2A chain-like	-1.62126	6.54551e-43	2.67741e-40
LOC106570851	LOC106570851	XM_014143422.1	protein unc-13 homolog B-like	-1.63177	8.15167e-17	2.10041e-15
LOC106580065	LOC106580065	XM_014160675.1	retinal dehydrogenase 1-like%2C transcript variant X2	-1.63657	1.03807e-16	2.62221e-15
LOC106565512	LOC106565512	XM_014132730.1	polymeric immunoglobulin receptor-like%2C transcript variant X1	-1.65319	0.000118592	0.000396952
LOC106608281	LOC106608281	XR_001329424.1	uncharacterized LOC106608281	-1.66559	5.4901e-18	1.6691e-16
LOC106581624	LOC106581624	XM_014163773.1	uncharacterized LOC106581624	-1.6717	3.09761e-26	2.44521e-24
LOC106605361	LOC106605361	XM_014200886.1	uncharacterized LOC106605361%2C transcript variant X2	-1.68466	1.60473e-09	1.35755e-08
LOC106573975	slc5a5	XM_014149454.1	solute carrier family 5 (sodium/iodide cotransporter)%2C member 5%2C transcript variant X2	-1.68841	1.96235e-16	4.75029e-15
LOC106593762	LOC106593762	XM_014185137.1	fish-egg lectin-like	-1.69392	1.58322e-11	1.86301e-10
LOC106564883	LOC106564883	NA	NA	-1.69855	9.31376e-14	1.54142e-12
LOC100194577	ldb3	NM_001139663.1	LIM domain binding 3	-1.70768	5.78608e-05	0.000208756
LOC106594696	LOC106594696	XM_014186093.1	uncharacterized protein DDB_G0290685-like	-1.71552	8.80944e-08	5.58086e-07
LOC100196771	gtr11	NM_001141793.1	Solute carrier family 2%2C facilitated glucose transporter member 11	-1.71979	1.60205e-29	1.86024e-27
LOC106613769	LOC106613769	XM_014216364.1	unconventional myosin-Vb-like	-1.72076	4.5567e-65	5.85797e-62
LOC106565076	LOC106565076	XM_014131709.1	1%2C25-dihydroxyvitamin D(3) 24-hydroxylase%2C mitochondrial-like	-1.72232	0.00179818	0.00453241
LOC106564224	LOC106564224	XM_014130274.1	zinc-binding protein A33-like	-1.72276	5.0983e-21	2.25176e-19
LOC106592622	LOC106592622	XM_014183963.1	fish-egg lectin-like	-1.72758	1.35233e-12	1.87513e-11
LOC106577448	LOC106577448	XR_001322126.1	uncharacterized LOC106577448%2C transcript variant X1	-1.73461	0.000644516	0.00181477
LOC106595961	LOC106595961	XM_014187299.1	PHD finger protein 20-like protein 1	-1.7434	2.96534e-111	1.33425e-107
LOC106593248	LOC106593248	XM_014184591.1	glutenin%2C high molecular weight subunit PW212-like	-1.74347	4.0939e-11	4.52517e-10
LOC106605695	LOC106605695	XM_014201588.1	meprin A subunit beta-like%2C transcript variant X2	-1.74545	8.36328e-31	1.1233e-28
LOC106575807	LOC106575807	XM_014152499.1	voltage-dependent L-type calcium channel subunit beta-4-like	-1.74808	2.56182e-21	1.17472e-19
LOC106604415	LOC106604415	XM_014199013.1	microfibril-associated glycoprotein 4-like%2C transcript variant X2	-1.75645	1.29624e-05	5.3867e-05
LOC106579993	LOC106579993	XM_014160514.1	voltage-dependent N-type calcium channel subunit alpha-1B-like%2C transcript variant X20	-1.75695	3.67742e-11	4.08936e-10
LOC106586621	LOC106586621	XR_001324226.1	uncharacterized LOC106586621%2C transcript variant X1	-1.77522	2.46123e-25	1.74398e-23
LOC106565804	LOC106565804	XM_014133359.1	bone morphogenetic protein 7-like	-1.78005	2.13474e-23	1.21972e-21
LOC106583277	pmel	XM_014167247.1	premelanosome protein	-1.78587	3.17289e-14	5.59586e-13
LOC106611399	LOC106611399	XM_014211570.1	dynactin subunit 1-like	-1.79498	1.54751e-29	1.80272e-27
LOC106576808	LOC106576808	XM_014154240.1	brorin-like%2C transcript variant X1	-1.79908	3.09234e-16	7.26105e-15
LOC106575744	LOC106575744	XR_001321828.1	uncharacterized LOC106575744	-1.80033	7.67492e-05	0.000268742
LOC106568115	LOC106568115	XM_014138149.1	betaine--homocysteine S-methyltransferase 1-like	-1.80239	2.36704e-19	8.43604e-18
LOC106569472	LOC106569472	XM_014140863.1	KN motif and ankyrin repeat domain-containing protein 1-like%2C transcript variant X2	-1.82106	0.00402899	0.00928296
LOC106602652	LOC106602652	XM_014195406.1	mucin-5AC-like	-1.8308	2.46842e-07	1.44394e-06
LOC106582846	LOC106582846	XM_014166361.1	contactin-4-like%2C transcript variant X2	-1.83339	7.02314e-21	3.04218e-19
LOC106575327	LOC106575327	XM_014151807.1	LON peptidase N-terminal domain and RING finger protein 2-like	-1.83661	3.01947e-23	1.70358e-21
LOC106598636	LOC106598636	XM_014189659.1	uncharacterized LOC106598636	-1.84265	1.00869e-06	5.2303e-06
LOC106565075	LOC106565075	NA	NA	-1.85258	6.90661e-15	1.34094e-13
LOC106603953	LOC106603953	XM_014198217.1	carbonic anhydrase 4-like	-1.86441	9.0349e-42	3.18843e-39
LOC106565101	LOC106565101	XM_014131827.1	uncharacterized LOC106565101%2C transcript variant X2	-1.88651	0.00014945	0.00048861
LOC106581781	LOC106581781	XM_014164075.1	collagen alpha-1(XXVIII) chain-like%2C transcript variant X2	-1.91536	1.61299e-13	2.57249e-12
LOC100196853	fgfp1	NM_001141875.1	Fibroblast growth factor-binding protein 1	-1.91911	9.82382e-24	5.80654e-22
LOC106589857	LOC106589857	XM_014180257.1	caskin-2-like%2C transcript variant X4	-1.93354	1.62154e-29	1.87682e-27
LOC106605693	LOC106605693	XM_014201584.1	meprin A subunit beta-like%2C transcript variant X2	-1.93637	4.70495e-10	4.37057e-09
LOC106574640	LOC106574640	XM_014150663.1	monocarboxylate transporter 14-like	-1.97662	3.65028e-48	2.08564e-45
LOC106608237	LOC106608237	XM_014206076.1	isthmin-2-like%2C transcript variant X3	-1.98065	4.711e-30	5.84749e-28
LOC106569855	LOC106569855	XM_014141536.1	cell wall protein DAN4-like	-1.99684	1.70615e-06	8.45931e-06
LOC106611341	LOC106611341	XM_014211474.1	intersectin-2-like	-2.00394	1.48656e-09	1.26561e-08
LOC106581149	LOC106581149	XR_001323020.1	protein turtle homolog B-like%2C transcript variant X3	-2.00617	2.073e-39	5.82965e-37
LOC106585654	LOC106585654	XM_014172085.1	galactosylceramide sulfotransferase-like	-2.01285	2.00288e-37	4.81484e-35
LOC106564892	LOC106564892	XM_014131381.1	uncharacterized LOC106564892	-2.02456	1.72618e-10	1.72359e-09
LOC106580807	LOC106580807	XM_014162265.1	semaphorin-7A-like	-2.02834	6.42639e-25	4.31575e-23
LOC106565465	LOC106565465	XM_014132676.1	protein lifeguard 2-like%2C transcript variant X2	-2.0408	1.78298e-32	2.76639e-30
LOC106591470	LOC106591470	XR_001325348.1	uncharacterized LOC106591470%2C transcript variant X1	-2.04086	4.28944e-16	9.80958e-15
LOC106583889	LOC106583889	XM_014168515.1	heme-binding protein 2-like	-2.0624	1.25276e-14	2.33045e-13
LOC100195470	hmgb3	NM_001140499.1	High mobility group protein B3	-2.0651	4.32206e-129	2.59295e-125
LOC106613063	LOC106613063	XM_014214947.1	chloride channel protein 2-like	-2.09715	6.79851e-12	8.42987e-11
LOC106610731	LOC106610731	XM_014210245.1	protein GREB1-like	-2.09792	1.33298e-13	2.15263e-12
LOC106600933	LOC106600933	XM_014192726.1	heme-binding protein 2-like	-2.11142	2.49672e-19	8.8631e-18
LOC106603645	LOC106603645	XM_014197563.1	dihydropyrimidinase-related protein 5-like%2C transcript variant X1	-2.12489	2.04258e-29	2.33411e-27
LOC106611660	LOC106611660	XM_014212101.1	solute carrier family 43 member 3-like	-2.14637	1.99772e-14	3.60993e-13
LOC106569859	LOC106569859	XR_001320571.1	uncharacterized LOC106569859	-2.1925	8.8417e-09	6.60577e-08
LOC106581822	gpd2	XM_014164200.1	glycerol-3-phosphate dehydrogenase 2 (mitochondrial)%2C transcript variant X2	-2.19668	2.44157e-20	9.83074e-19
LOC106581151	LOC106581151	XM_014163007.1	cell adhesion molecule 1-like%2C transcript variant X2	-2.20167	4.158e-29	4.57711e-27
LOC106599213	LOC106599213	XR_001327382.1	uncharacterized LOC106599213	-2.20391	5.47212e-07	2.99353e-06
LOC106561333	LOC106561333	NA	NA	-2.21591	0.000132743	0.000439055
LOC106600630	LOC106600630	XM_014192131.1	solute carrier family 26 member 6-like%2C transcript variant X1	-2.25975	6.9959e-10	6.32407e-09
LOC106570133	LOC106570133	XM_014142171.1	mucin-5AC-like	-2.26997	9.55182e-16	2.075e-14
LOC106566856	LOC106566856	XM_014135351.1	succinate dehydrogenase [ubiquinone] iron-sulfur subunit%2C mitochondrial-like	-2.28787	3.59434e-29	3.99327e-27
LOC106584646	LOC106584646	XM_014170139.1	aggrecan core protein-like	-2.28993	6.70889e-06	2.95839e-05
LOC106570853	LOC106570853	XR_001320786.1	uncharacterized LOC106570853%2C transcript variant X3	-2.3172	5.56217e-12	6.99322e-11
LOC106611947	LOC106611947	XR_001330184.1	uncharacterized LOC106611947	-2.31745	0.00302224	0.00718502
LOC106570132	LOC106570132	XM_014142169.1	mucin-5AC-like	-2.39402	1.88065e-14	3.40523e-13
LOC106609152	LOC106609152	XM_014207634.1	arg8-vasotocin receptor-like%2C transcript variant X2	-2.4169	9.72023e-22	4.67767e-20
LOC106561940	LOC106561940	XR_001318943.1	uncharacterized LOC106561940%2C transcript variant X3	-2.4172	0.00132337	0.00345339
LOC106613213	LOC106613213	XM_014215253.1	cholinesterase-like%2C transcript variant X4	-2.43843	1.10359e-90	2.83749e-87
LOC106561975	LOC106561975	XM_014126476.1	cathepsin L1-like	-2.56293	1.14909e-27	1.08563e-25
LOC106594819	LOC106594819	XM_014186204.1	corticosteroid 11-beta-dehydrogenase isozyme 2-like	-2.6145	9.03985e-81	1.62699e-77
LOC106596194	LOC106596194	XR_001326619.1	uncharacterized LOC106596194%2C transcript variant X1	-2.75551	1.06801e-08	7.87465e-08
LOC106562772	LOC106562772	XM_014127772.1	neuronal acetylcholine receptor subunit alpha-7-like%2C transcript variant X2	-2.76532	2.9566e-92	1.06426e-88
LOC106585409	LOC106585409	XM_014171569.1	spermatid perinuclear RNA-binding protein-like	-2.81519	6.99955e-10	6.32578e-09
LOC100196051	i20ra	NM_001141080.1	Interleukin-20 receptor alpha chain	-2.85066	1.71406e-08	1.21839e-07
LOC106597204	LOC106597204	XM_014188425.1	pinopsin-like	-2.89899	9.5267e-60	1.0086e-56
LOC106609915	LOC106609915	XM_014208958.1	sialic acid synthase-like	-2.90116	5.18054e-44	2.36049e-41
LOC106607156	LOC106607156	XM_014203794.1	heat-stable enterotoxin receptor-like	-2.90549	1.21978e-17	3.54057e-16
LOC100194860	gbrd	NM_001139889.1	Gamma-aminobutyric acid receptor subunit delta	-2.91233	5.35568e-42	1.9473e-39
LOC106603364	LOC106603364	XM_014196939.1	sodium channel subunit beta-4-like%2C transcript variant X2	-2.96477	7.08903e-30	8.65006e-28
LOC106594767	LOC106594767	XM_014186155.1	sialic acid synthase-like	-2.97415	7.16928e-48	3.97024e-45
LOC106591456	LOC106591456	NA	NA	-2.99862	1.3014e-09	1.11989e-08
LOC106609889	LOC106609889	XM_014208923.1	sialic acid synthase-like	-3.0057	2.4889e-65	3.44579e-62
LOC106604887	LOC106604887	XM_014200005.1	cytidine monophosphate-N-acetylneuraminic acid hydroxylase-like	-3.03573	8.85162e-18	2.61595e-16
LOC106570884	LOC106570884	XM_014143450.1	perforin-1-like	-3.08437	1.25021e-08	9.10612e-08
LOC106596671	LOC106596671	XM_014187940.1	protein APCDD1-like	-3.08567	4.51939e-34	8.38557e-32
LOC106609768	LOC106609768	XM_014208778.1	cytidine monophosphate-N-acetylneuraminic acid hydroxylase-like	-3.1025	3.07794e-23	1.73386e-21
LOC106592077	LOC106592077	XM_014183383.1	UPF0392 protein F13G3.3-like%2C transcript variant X3	-3.17818	2.40676e-10	2.34589e-09
LOC106595242	LOC106595242	XM_014186621.1	unconventional myosin-XV-like	-3.27031	0.00153505	0.00394232
LOC106609931	LOC106609931	XM_014208969.1	GATA zinc finger domain-containing protein 14-like	-3.35512	1.10151e-26	9.26402e-25
LOC106606422	LOC106606422	XM_014202639.1	uncharacterized LOC106606422	-3.36732	9.19875e-17	2.35169e-15
LOC106606833	LOC106606833	XM_014203242.1	uncharacterized LOC106606833	-3.38589	1.13135e-22	6.06014e-21
LOC106586762	LOC106586762	XM_014174368.1	growth hormone-regulated TBC protein 1-A-like	-3.39409	7.62298e-47	3.91995e-44
LOC106597721	LOC106597721	XM_014188872.1	uncharacterized LOC106597721	-3.53788	1.02878e-18	3.39741e-17
LOC106593521	LOC106593521	XM_014184863.1	uncharacterized LOC106593521%2C transcript variant X3	-3.825	3.03893e-07	1.74799e-06
LOC106576456	LOC106576456	NA	NA	-4.27826	2.02225e-05	8.07734e-05
