# Supplementary material for: Integration of Transcriptome, Gross Morphology and Histopathology in the Gill of Sea Farmed Atlantic Salmon (Salmo salar): Lessons From Multi-Site Sampling
Source: Front Genet. 2020 Jun 19;11:610. doi: 10.3389/fgene.2020.00610 (PMC7316992; doi:10.3389/fgene.2020.00610)
Supplement: Supplementary file 5 [file Table_3.xlsx]

## Sheet: Suppl Table 3
Supplementary Table 3. List of differentially expressed genes (DEGs) in gills of Atlantic salmon from sites B vs C, with the cut-off criteria
set at FDR < 0.01 and absolute Log2 FC > 1. The comparison was performed on 10 vs 13 fish from sites B and C, respectively, yielding
708 DEGs in total.
Gene ID	Gene symbol	Transcript ID	Gene description	Log2 FC	P value	FDR
LOC106598099	LOC106598099	XR_001327086.1	uncharacterized LOC106598099	4.87862	6.65062e-21	8.54985e-18
LOC106598396	LOC106598396	XR_001327174.1	uncharacterized LOC106598396	4.69259	2.77126e-16	1.10838e-13
LOC106598104	LOC106598104	XM_014189175.1	ribonuclease-like 3	4.61842	4.07416e-20	4.44404e-17
LOC106598253	LOC106598253	XM_014189304.1	ribonuclease-like 3	4.61584	6.45753e-20	6.6413e-17
LOC106604507	LOC106604507	XM_014199172.1	ribonuclease-like 3	4.6122	9.40702e-19	6.63951e-16
LOC106592799	LOC106592799	XM_014184132.1	uncharacterized LOC106592799	4.57315	2.21529e-11	2.1641e-09
LOC100196060	ang1	NM_001141089.1	Angiogenin-1	4.54087	9.911e-21	1.23019e-17
LOC106600208	LOC106600208	XR_001327731.1	uncharacterized LOC106600208	4.42694	9.16299e-20	8.67976e-17
LOC106564983	LOC106564983	XR_001319573.1	uncharacterized LOC106564983	4.25323	3.40093e-21	4.70846e-18
LOC106592919	LOC106592919	XM_014184266.1	uncharacterized LOC106592919	3.99052	4.39528e-10	2.97392e-08
LOC106591807	LOC106591807	XM_014183069.1	uncharacterized LOC106591807	3.97323	5.82268e-10	3.79698e-08
LOC100196525	ctrl	NM_001141554.1	chymotrypsin-like	3.96528	7.39627e-14	1.49571e-11
LOC106564982	LOC106564982	XR_001319572.1	uncharacterized LOC106564982	3.91969	3.45676e-19	2.82794e-16
LOC106599968	LOC106599968	XR_001327640.1	uncharacterized LOC106599968	3.88992	2.39002e-19	2.04836e-16
LOC106564984	LOC106564984	XR_001319574.1	uncharacterized LOC106564984	3.88483	1.52492e-19	1.33881e-16
LOC106600288	LOC106600288	XR_001327766.1	uncharacterized LOC106600288	3.8784	1.09488e-21	1.71353e-18
LOC106564985	LOC106564985	XR_001319575.1	uncharacterized LOC106564985	3.85923	9.5339e-20	8.79955e-17
LOC106561635	LOC106561635	XM_014125761.1	ladderlectin-like	3.82988	1.24492e-17	7.27749e-15
LOC106597696	LOC106597696	XR_001326983.1	uncharacterized LOC106597696	3.78673	3.54278e-19	2.83391e-16
LOC106590728	LOC106590728	NA	NA	3.71666	3.42651e-18	2.24255e-15
LOC106577309	LOC106577309	XM_014155258.1	glutathione peroxidase 6-like	3.69302	4.95388e-19	3.87652e-16
LOC106566533	LOC106566533	NA	NA	3.6262	2.52621e-14	6.06222e-12
LOC106566537	LOC106566537	XM_014134640.1	complement C1q tumor necrosis factor-related protein 3-like	3.56654	5.0264e-14	1.06827e-11
LOC106588495	LOC106588495	XR_001324660.1	uncharacterized LOC106588495	3.49821	1.76362e-10	1.3281e-08
LOC106577833	LOC106577833	XM_014156195.1	interleukin-8-like	3.49087	9.29042e-19	6.63951e-16
LOC106561636	LOC106561636	NA	NA	3.42887	2.88551e-15	8.8775e-13
LOC106566534	LOC106566534	XM_014134633.1	complement C1q tumor necrosis factor-related protein 3-like	3.41078	1.64848e-12	2.17358e-10
LOC106588483	LOC106588483	XR_001324659.1	uncharacterized LOC106588483	3.34868	1.67948e-09	9.41657e-08
LOC106588277	LOC106588277	XM_014177113.1	alpha-2%2C8-sialyltransferase 8F-like%2C transcript variant X4	2.91901	3.80803e-07	9.5124e-06
LOC106596487	LOC106596487	XM_014187765.1	complement C1q-like protein 2	2.84372	2.02588e-09	1.11334e-07
LOC106609709	LOC106609709	XM_014208680.1	complement C1q-like protein 2	2.84357	1.99896e-09	1.10022e-07
LOC106592632	LOC106592632	XM_014183971.1	complement C1q-like protein 2	2.84122	2.06714e-09	1.13083e-07
LOC100136358	nos2	XM_014214975.1	nitric oxide synthase 2%2C inducible%2C transcript variant X1	2.71638	6.93846e-17	3.2436e-14
LOC106573018	LOC106573018	XM_014147615.1	carboxypeptidase A1-like	2.65743	8.60131e-16	3.06547e-13
LOC106597223	LOC106597223	XM_014188437.1	protein-glutamine gamma-glutamyltransferase E-like	2.62776	3.96326e-05	0.000448339
LOC106598577	LOC106598577	XM_014189609.1	carboxypeptidase A1-like	2.62247	2.18836e-16	9.15954e-14
LOC106587127	LOC106587127	XR_001324371.1	uncharacterized LOC106587127	2.59928	6.90078e-13	1.04646e-10
LOC106576485	LOC106576485	XR_001321949.1	uncharacterized LOC106576485	2.53626	4.63793e-08	1.63097e-06
LOC100286614	hce2	NM_001146553.1	High choriolytic enzyme 2	2.44812	1.25348e-17	7.27749e-15
LOC106604607	LOC106604607	XM_014199430.1	endonuclease domain-containing 1 protein-like	2.42483	1.15616e-09	6.85619e-08
LOC100195857	cbpa1	NM_001140886.1	Carboxypeptidase A1	2.33933	3.8824e-13	6.35232e-11
LOC106601490	LOC106601490	XM_014193713.1	RING finger protein 208-like	2.32691	1.03571e-05	0.00015192
LOC106561558	LOC106561558	XM_014125655.1	carboxypeptidase A1-like%2C transcript variant X3	2.31886	4.21188e-13	6.82931e-11
LOC106586984	LOC106586984	XM_014174772.1	high choriolytic enzyme 1-like	2.31823	1.94644e-15	6.36946e-13
LOC106606795	LOC106606795	NA	NA	2.30726	1.69191e-05	0.000225491
LOC100196492	cdo1	NM_001141521.2	cysteine dioxygenase type 1	2.26752	1.76061e-12	2.30454e-10
LOC106593829	LOC106593829	NA	NA	2.26318	2.59031e-15	8.2514e-13
LOC106585685	ntrk2	XM_014172160.1	neurotrophic tyrosine kinase%2C receptor%2C type 2%2C transcript variant X1	2.25995	1.35586e-38	1.22014e-34
LOC106601685	LOC106601685	NA	NA	2.25745	0.000512247	0.00356404
LOC100136453	LOC100136453	NM_001123586.1	cathelicidin	2.23814	0.000144926	0.00129223
LOC106563926	LOC106563926	XM_014129907.1	antimicrobial peptide NK-lysin-like	2.21309	1.05569e-07	3.2095e-06
LOC106567034	LOC106567034	XM_014135842.1	complement C1q-like protein 4%2C transcript variant X2	2.1798	1.13055e-26	4.06952e-23
LOC106595541	LOC106595541	NA	NA	2.1657	3.22413e-18	2.14918e-15
LOC106575432	LOC106575432	NA	NA	2.16183	1.72745e-08	6.97882e-07
LOC106597868	LOC106597868	NA	NA	2.15318	0.000980017	0.00596218
LOC100192339	bglap	NM_001136551.1	bone gamma-carboxyglutamate (gla) protein	2.14516	0.000489439	0.00343996
LOC106591222	LOC106591222	XM_014182433.1	zymogen granule membrane protein 16-like%2C transcript variant X1	2.14385	2.35296e-08	9.00075e-07
LOC106602230	LOC106602230	XM_014194744.1	erythroblast NAD(P)(+)--arginine ADP-ribosyltransferase-like	2.11956	1.89779e-15	6.27639e-13
LOC106610450	LOC106610450	XM_014209829.1	erythroblast NAD(P)(+)--arginine ADP-ribosyltransferase-like	2.10447	2.89717e-10	2.06918e-08
LOC106565765	LOC106565765	NA	NA	2.09977	4.95519e-06	8.14834e-05
LOC106601491	LOC106601491	XM_014193714.1	RING finger protein 186-like	2.0907	8.55825e-05	0.000838353
LOC106609385	LOC106609385	NA	NA	2.07774	4.66807e-08	1.63774e-06
LOC106575436	LOC106575436	NA	NA	2.06159	1.19647e-05	0.00017023
LOC106601071	LOC106601071	XM_014192977.1	hemoglobin subunit alpha-4	2.01801	1.2419e-22	2.35281e-19
LOC106598092	LOC106598092	XM_014189168.1	protein-glutamine gamma-glutamyltransferase 2-like	2.01722	2.80778e-05	0.000338902
LOC106597715	LOC106597715	NA	NA	2.00734	2.23029e-07	6.08194e-06
LOC106581219	LOC106581219	XM_014163130.1	collagenase 3-like	1.99309	8.49081e-05	0.000833702
LOC106601706	LOC106601706	NA	NA	1.98289	6.13147e-06	9.79185e-05
LOC106597757	LOC106597757	NA	NA	1.97566	5.98658e-07	1.38759e-05
LOC106589989	LOC106589989	XM_014180468.1	myosin-7-like%2C transcript variant X2	1.97516	1.32929e-12	1.81247e-10
LOC106598291	LOC106598291	NA	NA	1.96784	4.83053e-05	0.000527388
LOC106601698	LOC106601698	NA	NA	1.96343	0.00110585	0.00657628
LOC106576346	LOC106576346	NA	NA	1.96308	1.17378e-05	0.000167786
LOC106571028	LOC106571028	XM_014143656.1	proto-oncogene c-Fos-like%2C transcript variant X1	1.95212	0.000978806	0.00595657
LOC106607373	LOC106607373	XM_014204292.1	hemoglobin subunit alpha-like	1.94883	1.18886e-12	1.66514e-10
LOC106606285	LOC106606285	NA	NA	1.93355	1.12301e-05	0.000162215
LOC106596585	LOC106596585	XR_001326716.1	uncharacterized LOC106596585	1.92896	0.000293503	0.00227938
LOC106583715	LOC106583715	XM_014168241.1	protein-glutamine gamma-glutamyltransferase 2-like	1.92811	1.06806e-05	0.000155651
LOC106589580	LOC106589580	XM_014179723.1	class A basic helix-loop-helix protein 15-like	1.9255	1.55945e-08	6.38612e-07
LOC106570153	LOC106570153	NA	NA	1.91138	3.72988e-06	6.41782e-05
LOC106580394	LOC106580394	XM_014161399.1	L-serine dehydratase/L-threonine deaminase-like	1.90864	2.0974e-26	6.86347e-23
LOC106594149	LOC106594149	XM_014185514.1	C-type lectin domain family 4 member E-like	1.90768	9.1625e-09	4.05176e-07
LOC100136458	tnf-alpha-2	NM_001123590.1	tumor necrosis factor alpha-2 precursor	1.90759	1.30174e-12	1.78846e-10
LOC106575633	LOC106575633	NA	NA	1.90727	6.23966e-07	1.43736e-05
LOC106571734	LOC106571734	XM_014145136.1	phospholipase B1%2C membrane-associated-like	1.90725	2.91762e-07	7.61033e-06
LOC106597302	LOC106597302	NA	NA	1.90152	5.5726e-08	1.88349e-06
LOC106564408	LOC106564408	NA	NA	1.89861	5.61525e-07	1.31336e-05
LOC106598550	LOC106598550	XM_014189588.1	protein-glutamine gamma-glutamyltransferase 2-like	1.89178	7.57337e-05	0.00076121
LOC106601723	LOC106601723	NA	NA	1.8873	0.000287947	0.00224398
LOC106578097	LOC106578097	XM_014156689.1	uncharacterized LOC106578097%2C transcript variant X2	1.87544	4.12589e-11	3.72219e-09
LOC106563789	LOC106563789	XR_001319319.1	uncharacterized LOC106563789%2C transcript variant X2	1.87208	0.00160956	0.00877714
LOC106607078	LOC106607078	XM_014203669.1	ral guanine nucleotide dissociation stimulator-like 1%2C transcript variant X2	1.87017	3.61108e-25	9.28461e-22
LOC106597391	LOC106597391	NA	NA	1.86336	9.33774e-08	2.88022e-06
LOC106597728	LOC106597728	NA	NA	1.86257	7.37506e-07	1.65912e-05
LOC106597249	LOC106597249	NA	NA	1.85495	6.23715e-08	2.07115e-06
LOC106597704	LOC106597704	XM_014188862.1	endonuclease domain-containing 1 protein-like	1.85149	5.84383e-16	2.21426e-13
LOC106601076	LOC106601076	XM_014192981.1	hemoglobin subunit alpha-4	1.84496	1.63495e-20	1.96173e-17
LOC106578829	LOC106578829	XM_014158024.1	proline-rich protein 18-like	1.84258	8.20365e-06	0.000124389
LOC106596536	LOC106596536	XR_001326702.1	uncharacterized LOC106596536	1.83825	0.000999175	0.00606208
LOC106612333	LOC106612333	XM_014213381.1	phytanoyl-CoA dioxygenase domain-containing protein 1-like%2C transcript variant X1	1.83247	5.79241e-18	3.65796e-15
LOC106591797	LOC106591797	XM_014183059.1	protein disulfide-isomerase-like	1.81802	2.70491e-05	0.000329273
LOC106569355	LOC106569355	XM_014140652.1	protein CYR61-like	1.80411	6.59767e-09	3.08428e-07
LOC106599048	LOC106599048	XM_014190103.1	retinol-binding protein 1-like	1.79591	2.6165e-05	0.000319591
LOC106609427	LOC106609427	NA	NA	1.79153	2.60171e-06	4.7928e-05
LOC106585833	LOC106585833	XM_014172504.1	histone H1-like	1.79069	1.3481e-17	7.58219e-15
LOC106609554	LOC106609554	XR_001329712.1	Ig kappa-b4 chain C region-like	1.77629	8.92278e-07	1.94657e-05
LOC106563598	LOC106563598	XR_001319285.1	uncharacterized LOC106563598	1.76703	1.2205e-08	5.18078e-07
LOC106604170	LOC106604170	XM_014198590.1	uncharacterized LOC106604170	1.76358	4.28098e-14	9.28302e-12
LOC106597362	LOC106597362	XR_001326921.1	uncharacterized LOC106597362	1.75986	1.0548e-09	6.37057e-08
LOC106562680	LOC106562680	XM_014127661.1	zymogen granule membrane protein 16-like%2C transcript variant X1	1.75915	2.09891e-08	8.1502e-07
LOC106599916	LOC106599916	NA	NA	1.74958	2.16457e-05	0.000274835
LOC106574478	LOC106574478	NA	NA	1.74733	0.00044319	0.00317727
LOC106591776	LOC106591776	XM_014182985.1	endonuclease domain-containing 1 protein-like%2C transcript variant X1	1.74457	8.99131e-08	2.7901e-06
LOC106594109	LOC106594109	XM_014185479.1	C-type lectin domain family 4 member M-like	1.74288	7.80567e-08	2.4799e-06
LOC106599620	LOC106599620	XM_014190911.1	flocculation protein FLO11-like%2C transcript variant X3	1.74173	4.58023e-12	5.35292e-10
LOC106601079	LOC106601079	NA	NA	1.73336	2.76796e-14	6.55496e-12
LOC106597780	LOC106597780	XR_001326999.1	uncharacterized LOC106597780	1.72361	1.09132e-09	6.56907e-08
LOC106606797	LOC106606797	XR_001329125.1	uncharacterized LOC106606797	1.71595	1.85032e-05	0.000242196
LOC106567571	LOC106567571	XM_014137044.1	H-2 class II histocompatibility antigen%2C A-K alpha chain-like%2C transcript variant X2	1.71075	7.01778e-14	1.4353e-11
LOC106596025	LOC106596025	XR_001326546.1	uncharacterized LOC106596025	1.70058	0.000599869	0.00403527
LOC106597530	LOC106597530	XR_001326956.1	uncharacterized LOC106597530	1.69995	1.19253e-10	9.51803e-09
LOC106609548	LOC106609548	NA	NA	1.69842	1.70851e-06	3.32372e-05
LOC106579105	LOC106579105	XM_014158669.1	glycylpeptide N-tetradecanoyltransferase 1-like%2C transcript variant X1	1.69076	3.01947e-07	7.84756e-06
LOC106609555	LOC106609555	NA	NA	1.69005	8.97174e-06	0.000134586
LOC106601678	LOC106601678	NA	NA	1.68792	3.19806e-06	5.65483e-05
LOC106596584	LOC106596584	XR_001326715.1	uncharacterized LOC106596584	1.68697	0.000103709	0.000981109
LOC106607416	LOC106607416	XM_014204341.1	perforin-1-like	1.68392	5.40406e-08	1.83168e-06
LOC106573692	LOC106573692	XM_014148970.1	thyrotropin-releasing hormone receptor-like	1.68391	1.9265e-08	7.63724e-07
LOC106562681	LOC106562681	XM_014127663.1	zymogen granule membrane protein 16-like%2C transcript variant X1	1.68255	5.28602e-07	1.24282e-05
LOC106596606	LOC106596606	XR_001326721.1	uncharacterized LOC106596606	1.68032	0.00134629	0.0076589
LOC106565927	LOC106565927	XM_014133622.1	src-like-adapter 2	1.67922	5.77068e-07	1.34274e-05
LOC106592675	LOC106592675	XM_014184012.1	Ig heavy chain Mem5-like	1.67881	3.58096e-07	9.03928e-06
LOC106590985	LOC106590985	XR_001325151.1	uncharacterized LOC106590985	1.67707	0.00111084	0.00660051
LOC106569927	LOC106569927	XM_014141678.1	tumor necrosis factor receptor superfamily member 11B-like	1.67675	2.1807e-09	1.18575e-07
LOC106600447	LOC106600447	XM_014191808.1	C-C motif chemokine 4-like	1.67578	1.19908e-11	1.26947e-09
LOC106581492	LOC106581492	XM_014163567.1	P2Y purinoceptor 13-like	1.6742	2.63053e-06	4.83105e-05
LOC106613975	LOC106613975	XM_014216863.1	ABC transporter G family member 20-like	1.67172	4.47889e-32	2.30318e-28
LOC106601722	LOC106601722	NA	NA	1.67104	0.000556671	0.00380226
LOC106596754	LOC106596754	XR_001326756.1	uncharacterized LOC106596754	1.66819	1.74052e-09	9.72853e-08
LOC106575629	LOC106575629	XM_014152239.1	intermediate filament protein ON3-like	1.66687	1.50203e-07	4.31906e-06
LOC106594709	LOC106594709	XR_001326186.1	uncharacterized LOC106594709	1.66546	0.000259267	0.0020661
LOC106609553	LOC106609553	NA	NA	1.66325	3.93635e-07	9.79217e-06
LOC106560913	LOC106560913	XM_014124350.1	ABC transporter G family member 23-like	1.65615	6.85087e-15	1.85417e-12
LOC106598707	LOC106598707	NA	NA	1.65084	1.10631e-05	0.000160188
LOC106601074	LOC106601074	XM_014192980.1	hemoglobin subunit beta-1-like	1.64733	1.56301e-16	6.77858e-14
LOC106583701	LOC106583701	XM_014168205.1	protein-glutamine gamma-glutamyltransferase 2-like	1.64631	2.30806e-05	0.000288376
LOC106595269	LOC106595269	XM_014186644.1	hemoglobin subunit alpha-4-like	1.64536	1.9884e-13	3.52584e-11
LOC106609589	LOC106609589	NA	NA	1.63823	1.64734e-05	0.00022052
LOC106570152	LOC106570152	NA	NA	1.63648	6.88729e-08	2.23139e-06
LOC106587482	LOC106587482	XM_014175905.1	myosin-binding protein C%2C cardiac-type-like%2C transcript variant X7	1.6356	2.82653e-07	7.42656e-06
LOC106591367	LOC106591367	XM_014182592.1	ABC transporter G family member 23-like	1.63531	4.99634e-13	7.95789e-11
LOC106582517	LOC106582517	XR_001323326.1	uncharacterized LOC106582517%2C transcript variant X1	1.6338	0.000179434	0.00153674
LOC106606782	LOC106606782	NA	NA	1.63286	1.14805e-05	0.000164905
LOC106607372	LOC106607372	XM_014204291.1	hemoglobin subunit beta-like	1.63038	1.48438e-13	2.76849e-11
LOC106568147	LOC106568147	XM_014138222.1	dual specificity protein phosphatase 4-like	1.6294	1.83829e-06	3.54976e-05
LOC106595494	LOC106595494	XM_014186866.1	protein disulfide-isomerase A2-like	1.62583	1.84857e-05	0.000242056
LOC106564629	LOC106564629	XM_014130797.1	glial fibrillary acidic protein-like	1.62471	3.12182e-06	5.56302e-05
LOC106594923	LOC106594923	NA	NA	1.62434	0.00109443	0.00651912
LOC100196081	nkl	NM_001141110.1	Antimicrobial peptide NK-lysin	1.62334	4.32257e-10	2.93576e-08
LOC106600435	LOC106600435	XM_014191790.1	aquaporin FA-CHIP-like	1.62329	2.09565e-15	6.79595e-13
LOC106575639	LOC106575639	XM_014152251.1	keratin%2C type I cytoskeletal 18-like%2C transcript variant X2	1.61943	1.39006e-06	2.79847e-05
LOC106595290	LOC106595290	XR_001326363.1	uncharacterized LOC106595290%2C transcript variant X1	1.61558	1.01496e-06	2.15797e-05
LOC106564129	LOC106564129	XM_014130176.1	uncharacterized LOC106564129	1.61542	2.47362e-05	0.000305981
LOC106609426	LOC106609426	NA	NA	1.61198	2.4736e-07	6.62004e-06
LOC106601904	LOC106601904	NA	NA	1.61173	2.24145e-08	8.60161e-07
LOC106575435	LOC106575435	NA	NA	1.61109	1.23313e-05	0.000174618
LOC100136576	LOC100136576	NM_001123666.1	beta globin	1.611	1.32631e-16	5.82217e-14
LOC106601078	LOC106601078	XM_014192983.1	hemoglobin subunit alpha-like	1.60842	1.58658e-10	1.21512e-08
LOC106595268	LOC106595268	XM_014186643.1	hemoglobin subunit beta-like	1.60626	6.63766e-12	7.5425e-10
LOC106574919	LOC106574919	XM_014151052.1	E3 ubiquitin-protein ligase TRIM39-like	1.60565	1.57706e-13	2.91117e-11
LOC100195656	cah12	XM_014140666.1	Carbonic anhydrase 12%2C transcript variant X1	1.60517	2.46791e-06	4.57676e-05
LOC106594777	LOC106594777	XM_014186163.1	hemoglobin subunit alpha-4-like	1.6031	6.82002e-13	1.04023e-10
LOC106576381	LOC106576381	NA	NA	1.60111	0.00038491	0.00283048
LOC106576337	LOC106576337	NA	NA	1.60014	1.5647e-07	4.48076e-06
LOC106596024	LOC106596024	XR_001326545.1	uncharacterized LOC106596024	1.59865	0.00118268	0.0069324
LOC106601072	LOC106601072	XM_014192978.1	hemoglobin subunit alpha	1.59797	1.59574e-14	4.10288e-12
LOC106607383	LOC106607383	XM_014204300.1	hemoglobin subunit alpha-like	1.59313	1.79077e-11	1.79057e-09
LOC106601051	LOC106601051	XM_014192952.1	hemoglobin subunit beta-like	1.59028	4.70297e-15	1.34356e-12
LOC106602156	LOC106602156	XR_001328177.1	uncharacterized LOC106602156	1.5878	3.28692e-11	3.03374e-09
LOC106611675	LOC106611675	XR_001330139.1	uncharacterized LOC106611675	1.58293	2.89763e-12	3.5843e-10
LOC106609542	LOC106609542	NA	NA	1.57862	0.000283156	0.00221527
LOC106596623	LOC106596623	XR_001326723.1	uncharacterized LOC106596623	1.57858	0.000947555	0.00581059
LOC100286729	roa2	NM_001146669.1	Heterogeneous nuclear ribonucleoproteins A2/B1	1.5782	1.38022e-05	0.000192046
LOC106565178	LOC106565178	XM_014132022.1	interferon-induced protein 44-like	1.57615	2.53415e-13	4.34378e-11
LOC106610451	LOC106610451	XM_014209830.1	NAD(P)(+)--arginine ADP-ribosyltransferase 1-like	1.57248	1.00048e-06	2.12971e-05
LOC106607371	LOC106607371	XM_014204289.1	hemoglobin subunit beta-1-like	1.55686	1.99398e-10	1.48863e-08
LOC106609425	LOC106609425	NA	NA	1.55653	0.000252924	0.00202587
LOC106574479	LOC106574479	NA	NA	1.55518	6.75648e-05	0.00069132
LOC106576339	LOC106576339	NA	NA	1.55042	5.24405e-08	1.79094e-06
LOC106595942	LOC106595942	XM_014187283.1	granzyme-like protein 1	1.54813	4.47572e-09	2.22525e-07
LOC106604796	LOC106604796	XM_014199840.1	zonadhesin-like	1.54633	1.6439e-11	1.66687e-09
LOC106592278	LOC106592278	XM_014183600.1	basement membrane-specific heparan sulfate proteoglycan core protein-like	1.54545	1.46355e-10	1.1403e-08
LOC106577171	LOC106577171	XM_014154988.1	myelin and lymphocyte protein-like	1.54214	3.86805e-10	2.66223e-08
LOC106598526	LOC106598526	XM_014189573.1	regulator of G-protein signaling 21-like	1.53755	2.27759e-06	4.27223e-05
LOC106564407	LOC106564407	NA	NA	1.52926	1.83991e-08	7.34252e-07
LOC106590528	LOC106590528	XM_014181631.1	uncharacterized LOC106590528	1.52716	1.39535e-08	5.81332e-07
LOC106601077	LOC106601077	XM_014192982.1	hemoglobin subunit alpha	1.52661	3.28204e-13	5.49489e-11
LOC106572553	fam43b	NM_001279050.1	mitochondrial ubiquitin ligase activator of NF-kB	1.52438	5.77337e-08	1.93994e-06
LOC106607379	LOC106607379	XM_014204297.1	hemoglobin subunit beta-1-like	1.52047	6.51809e-10	4.2123e-08
LOC106572795	LOC106572795	XM_014147274.1	eosinophil peroxidase-like	1.51528	1.53936e-08	6.33265e-07
LOC106572735	LOC106572735	XM_014147173.1	eosinophil peroxidase-like	1.51445	1.58347e-08	6.46976e-07
LOC106609551	LOC106609551	NA	NA	1.51169	1.42379e-05	0.000196966
LOC106579499	LOC106579499	XM_014159444.1	uncharacterized serine-rich protein C215.13-like	1.51038	1.46106e-09	8.44176e-08
LOC106574567	LOC106574567	NA	NA	1.5059	2.34459e-08	8.9783e-07
LOC106579089	LOC106579089	XM_014158636.1	alpha-tectorin-like	1.50418	3.17743e-11	2.94781e-09
LOC106613064	LOC106613064	XR_001330423.1	endothelin-converting enzyme-like 1%2C transcript variant X4	1.50124	3.48633e-08	1.26761e-06
LOC106574583	LOC106574583	NA	NA	1.49854	5.16467e-05	0.000554617
LOC106576386	LOC106576386	XR_001321934.1	uncharacterized LOC106576386	1.49775	5.01523e-08	1.72754e-06
LOC106600843	LOC106600843	XM_014192555.1	interleukin-17F-like	1.4968	1.00405e-07	3.07328e-06
LOC106561622	LOC106561622	XM_014125747.1	cytochrome c oxidase subunit 8B%2C mitochondrial-like	1.49534	8.76915e-06	0.000131907
LOC106577163	LOC106577163	XM_014154975.1	myelin and lymphocyte protein-like	1.49364	8.94554e-10	5.54223e-08
LOC106587254	dpep1	XM_014175488.1	dipeptidase 1 (renal)	1.48745	2.83159e-07	7.42899e-06
LOC106607151	LOC106607151	XM_014203786.1	interferon-induced very large GTPase 1-like	1.48322	5.41943e-10	3.55981e-08
LOC106586805	LOC106586805	XM_014174472.1	C-X-C chemokine receptor type 1-like%2C transcript variant X2	1.48167	2.98971e-07	7.77584e-06
LOC106576384	LOC106576384	NA	NA	1.47471	5.44964e-05	0.000580359
LOC106583714	LOC106583714	XM_014168240.1	protein-glutamine gamma-glutamyltransferase 2-like	1.47089	2.92631e-05	0.000350492
LOC106597727	LOC106597727	NA	NA	1.46872	6.55043e-08	2.14159e-06
LOC106607380	LOC106607380	XM_014204298.1	hemoglobin subunit beta-1-like	1.46686	3.20854e-08	1.18456e-06
LOC106606375	LOC106606375	XM_014202526.1	Ig heavy chain Mem5-like	1.46498	5.95106e-05	0.000623089
LOC106562114	LOC106562114	XM_014126713.1	ADM-like	1.46212	4.23408e-14	9.23696e-12
LOC106565937	LOC106565937	XM_014133629.1	tumor necrosis factor receptor superfamily member 21-like%2C transcript variant X2	1.46107	2.20853e-08	8.5025e-07
LOC106606767	LOC106606767	XM_014203125.1	uncharacterized LOC106606767	1.46082	2.73896e-05	0.000332313
LOC106611914	LOC106611914	XM_014212572.1	dual specificity protein phosphatase 1-like	1.46016	3.25736e-06	5.73639e-05
LOC106564757	LOC106564757	XM_014131101.1	keratin%2C type I cytoskeletal 19-like	1.45317	2.89908e-06	5.23609e-05
LOC100380441	slc5a12	NM_001173725.1	solute carrier family 5 (sodium/monocarboxylate cotransporter)%2C member 12	1.45275	2.49184e-06	4.60689e-05
LOC106607375	LOC106607375	XM_014204293.1	hemoglobin subunit alpha-4	1.4521	1.29861e-08	5.47363e-07
LOC106597775	LOC106597775	XM_014188915.1	protein-glutamine gamma-glutamyltransferase 2-like	1.45185	0.000542549	0.00372276
LOC106595587	LOC106595587	NA	NA	1.44965	0.000136757	0.00123315
LOC100136572	hba	NM_001123662.1	hemoglobin subunit alpha	1.44812	1.99747e-10	1.48863e-08
LOC106609552	LOC106609552	NA	NA	1.44485	6.3236e-05	0.000654281
LOC106597714	LOC106597714	NA	NA	1.44331	1.94953e-08	7.71157e-07
LOC106600318	LOC106600318	XM_014191625.1	hemoglobin subunit beta-like	1.44294	9.95225e-10	6.05137e-08
LOC106563597	LOC106563597	XM_014129319.1	uncharacterized LOC106563597	1.44262	6.37052e-10	4.13923e-08
LOC106601909	LOC106601909	XM_014194342.1	mannose-binding protein C-like	1.43628	1.09447e-05	0.000158729
LOC106610904	LOC106610904	XM_014210570.1	CD209 antigen-like protein C%2C transcript variant X1	1.436	4.24681e-09	2.12908e-07
LOC106597776	LOC106597776	XR_001326998.1	uncharacterized LOC106597776	1.43531	8.14468e-05	0.000807202
LOC106564963	LOC106564963	XM_014131520.1	keratin%2C type I cytoskeletal 42-like	1.43257	4.42753e-06	7.40238e-05
LOC106607112	LOC106607112	XM_014203715.1	hemoglobin subunit beta-1	1.43224	3.94706e-09	1.99548e-07
LOC106583765	LOC106583765	XM_014168324.1	RING finger protein 208-like	1.4304	5.7548e-09	2.74371e-07
LOC106597756	LOC106597756	NA	NA	1.42908	1.65589e-07	4.70134e-06
LOC106606263	LOC106606263	NA	NA	1.42887	2.71159e-05	0.000329863
LOC106607237	LOC106607237	XR_001329176.1	hemoglobin subunit alpha-like	1.4279	1.2629e-09	7.39178e-08
LOC106564981	LOC106564981	XM_014131537.1	cathepsin L1-like	1.42505	5.56878e-09	2.66561e-07
LOC106581616	irg1	XM_014163747.1	immunoresponsive 1 homolog (mouse)	1.42448	1.35905e-07	3.96438e-06
LOC106607236	LOC106607236	XM_014203987.1	hemoglobin subunit beta-1-like	1.41999	4.88794e-08	1.69505e-06
LOC106588302	LOC106588302	XM_014177137.1	uncharacterized LOC106588302	1.41751	0.000116979	0.00108025
LOC106562113	LOC106562113	XM_014126711.1	tetranectin-like protein%2C transcript variant X1	1.41355	7.60874e-09	3.4801e-07
LOC106595459	LOC106595459	XR_001326395.1	uncharacterized LOC106595459	1.41293	2.09272e-07	5.78124e-06
LOC106561895	LOC106561895	XM_014126201.1	collagen alpha-1(X) chain-like	1.4105	6.63445e-10	4.26453e-08
LOC106574569	LOC106574569	NA	NA	1.40739	9.10419e-06	0.00013631
LOC106591530	LOC106591530	XM_014182751.1	endonuclease domain-containing 1 protein-like	1.40569	3.46623e-10	2.42273e-08
LOC106601901	LOC106601901	NA	NA	1.39958	5.95116e-05	0.000623089
LOC106587398	LOC106587398	XM_014175753.1	cytochrome P450 2D15-like	1.39866	0.000122158	0.00112202
LOC106595586	LOC106595586	NA	NA	1.39711	0.000360024	0.00268089
LOC106601915	LOC106601915	XM_014194350.1	suppressor of cytokine signaling 3-like	1.39706	1.23553e-10	9.8394e-09
LOC100136584	hbb1	NM_001123672.1	beta-globin	1.3956	1.58013e-12	2.09884e-10
LOC106590712	LOC106590712	XM_014181871.1	galectin-2-like	1.3948	1.06571e-05	0.000155434
LOC106569486	LOC106569486	XM_014140877.1	carbonic anhydrase 12-like	1.39479	6.20208e-06	9.89401e-05
LOC106579293	LOC106579293	XM_014159082.1	chondroadherin-like	1.39418	1.4339e-09	8.31153e-08
LOC106574553	LOC106574553	XM_014150523.1	2-oxoglutarate receptor 1-like	1.38995	4.65353e-06	7.72495e-05
LOC106578890	LOC106578890	XM_014158126.1	snaclec 1-like	1.38679	2.40478e-09	1.29391e-07
LOC106604090	LOC106604090	XM_014198477.1	uncharacterized LOC106604090	1.38546	1.81443e-09	1.0079e-07
LOC106591553	LOC106591553	NA	NA	1.38344	0.000398093	0.00290752
LOC106577874	LOC106577874	XR_001322211.1	uncharacterized LOC106577874	1.38007	0.000179363	0.00153649
LOC106576338	LOC106576338	NA	NA	1.369	0.0005749	0.00390014
LOC106580712	LOC106580712	XM_014162043.1	neutrophil cytosol factor 2-like%2C transcript variant X2	1.36798	9.72442e-09	4.26878e-07
LOC106579249	LOC106579249	XM_014158984.1	cytochrome c oxidase subunit 6B1-like%2C transcript variant X1	1.3615	3.68905e-11	3.3618e-09
LOC106582569	col6a2	XM_014165792.1	collagen%2C type VI%2C alpha 2	1.35929	3.75705e-11	3.41512e-09
LOC100286404	klf2	NM_001146353.1	Krueppel-like factor 2	1.3557	4.9898e-22	8.16423e-19
LOC106606373	LOC106606373	XM_014202523.1	uncharacterized LOC106606373	1.35149	2.55848e-07	6.79667e-06
LOC106612682	LOC106612682	XM_014214087.1	cytochrome c oxidase subunit 7A2%2C mitochondrial-like	1.35101	3.06948e-15	9.23575e-13
LOC106576379	LOC106576379	NA	NA	1.35088	0.00070961	0.00461901
LOC106586877	LOC106586877	XM_014174604.1	granzyme-like protein 1	1.34827	2.57826e-07	6.84418e-06
LOC106613766	LOC106613766	XM_014216354.1	elongation factor 2-like%2C transcript variant X2	1.34724	2.88812e-51	1.03961e-46
LOC106584037	LOC106584037	XM_014168848.1	cAMP-specific 3'%2C5'-cyclic phosphodiesterase 4B-like%2C transcript variant X6	1.34482	6.48063e-38	3.88795e-34
LOC106588257	LOC106588257	NA	NA	1.34177	0.000848526	0.00533232
LOC106602268	LOC106602268	XM_014194793.1	hydroperoxide isomerase ALOXE3-like	1.34037	8.47598e-07	1.86906e-05
LOC106561078	LOC106561078	XM_014124700.1	protein phosphatase 1 regulatory subunit 15A-like%2C transcript variant X2	1.34035	0.000130541	0.00118571
LOC106569481	LOC106569481	XM_014140873.1	carbonic anhydrase 4-like	1.3387	0.000134171	0.00121256
LOC106583478	LOC106583478	XM_014167706.1	G0/G1 switch protein 2-like%2C transcript variant X1	1.33592	6.64824e-11	5.67085e-09
LOC106571057	LOC106571057	XM_014143715.1	interleukin-17F-like	1.33341	5.71385e-08	1.9258e-06
LOC106590759	LOC106590759	XM_014181918.1	caspase-14-like	1.33187	1.56771e-06	3.09078e-05
LOC106593928	LOC106593928	XM_014185305.1	epiphycan-like	1.32882	7.28301e-06	0.000112708
LOC100195982	nar5	NM_001141011.1	Ecto-ADP-ribosyltransferase 5	1.32734	1.46594e-07	4.23498e-06
LOC106597311	LOC106597311	XM_014188520.1	C-C chemokine receptor type 9-like	1.32558	3.1086e-05	0.000368728
LOC106590516	LOC106590516	XM_014181602.1	eotaxin-like	1.32417	9.30112e-07	2.00842e-05
LOC106564204	LOC106564204	XM_014130337.1	saposin-C-like%2C transcript variant X2	1.3234	3.50284e-05	0.000406081
LOC106573183	LOC106573183	XM_014147942.1	pyrin-like	1.32286	6.6145e-15	1.80375e-12
LOC106586102	LOC106586102	XR_001324130.1	uncharacterized LOC106586102	1.31788	0.000651177	0.00430403
LOC100195092	ier2	NM_001140121.1	immediate early response 2	1.31637	0.000338769	0.00255159
LOC106587041	prdm6	XM_014174908.1	PR domain containing 6%2C transcript variant X3	1.31517	2.09918e-10	1.55798e-08
LOC106564992	LOC106564992	XM_014131546.1	uncharacterized protein C17orf67 homolog	1.31184	6.8356e-11	5.77592e-09
LOC106578435	LOC106578435	XM_014157203.1	E3 ubiquitin-protein ligase TRIM58-like%2C transcript variant X1	1.30813	2.52385e-13	4.34378e-11
LOC106601906	LOC106601906	NA	NA	1.30714	7.89868e-05	0.000787593
LOC106609541	LOC106609541	NA	NA	1.30601	0.000185772	0.00158104
LOC100195830	nar4	NM_001140859.2	Ecto-ADP-ribosyltransferase 4	1.30576	7.55276e-05	0.000759623
LOC106608949	LOC106608949	XM_014207196.1	zonadhesin-like%2C transcript variant X2	1.30212	1.49202e-05	0.00020413
LOC106560450	cyr61	XM_014123373.1	cysteine-rich%2C angiogenic inducer%2C 61	1.30017	4.65091e-05	0.000511236
LOC106578030	LOC106578030	XM_014156576.1	pentraxin fusion protein-like	1.29854	0.000195903	0.00165223
LOC106582581	LOC106582581	XM_014165806.1	collagen alpha-2(VI) chain-like	1.29768	2.77107e-09	1.45617e-07
LOC106609040	LOC106609040	XM_014207381.1	leucine-rich repeat protein soc-2 homolog	1.29753	5.29365e-08	1.80445e-06
LOC106610439	LOC106610439	NA	NA	1.29691	0.00132963	0.00759463
LOC106608845	LOC106608845	XR_001329595.1	uncharacterized LOC106608845	1.29681	1.14443e-07	3.42943e-06
LOC106603774	klhl35	XM_014197843.1	kelch-like family member 35%2C transcript variant X1	1.29622	6.82239e-09	3.17696e-07
LOC106588293	LOC106588293	XR_001324624.1	uncharacterized LOC106588293	1.29336	1.06914e-06	2.25982e-05
LOC106602965	zic3	XM_014196026.1	Zic family member 3%2C transcript variant X2	1.29248	2.65359e-06	4.86342e-05
LOC106583575	LOC106583575	XM_014167942.1	galanin receptor type 1-like	1.28758	0.000103884	0.00098188
LOC106561312	fjx1	XM_014125130.1	four jointed box 1	1.28628	3.07165e-15	9.23575e-13
LOC106561379	LOC106561379	XM_014125266.1	pyrin-like	1.28607	2.34027e-13	4.06958e-11
LOC106606771	LOC106606771	XM_014203129.1	adhesion G protein-coupled receptor E2-like	1.28499	5.08772e-18	3.27031e-15
LOC106570801	LOC106570801	XM_014143337.1	calcium/calmodulin-dependent protein kinase type II subunit beta-like	1.27978	7.8919e-06	0.000120265
LOC106564353	LOC106564353	XM_014130448.1	antimicrobial peptide NK-lysin-like	1.27815	7.22325e-06	0.000111976
LOC106590498	LOC106590498	XM_014181586.1	SH2 domain-containing protein 1A-like	1.27193	2.96879e-06	5.34151e-05
LOC106588714	LOC106588714	XM_014177991.1	adseverin-like	1.26583	1.90056e-15	6.27639e-13
LOC106613110	LOC106613110	XM_014215041.1	collagenase 3-like	1.26504	6.80821e-05	0.000694835
LOC106582240	LOC106582240	XM_014165110.1	interferon-induced guanylate-binding protein 1-like	1.26466	9.2037e-13	1.34673e-10
LOC106604681	LOC106604681	XM_014199580.1	neuronal acetylcholine receptor subunit alpha-7-like%2C transcript variant X1	1.26275	2.70784e-06	4.94527e-05
LOC106609490	LOC106609490	XM_014208363.1	normal mucosa of esophagus-specific gene 1 protein-like	1.26086	2.10475e-08	8.16408e-07
LOC106560518	LOC106560518	XM_014123490.1	leucine-rich repeat-containing protein 19-like%2C transcript variant X2	1.25625	1.05864e-06	2.24134e-05
LOC106594704	LOC106594704	NA	NA	1.25544	3.9007e-06	6.66819e-05
LOC100195709	pkhf1	NM_001140738.1	Pleckstrin homology domain-containing family F member 1	1.25403	2.51744e-11	2.4284e-09
LOC100196581	batf3	NM_001141610.1	basic leucine zipper transcription factor%2C ATF-like 3	1.24838	3.70413e-08	1.33869e-06
LOC100194948	cef10	NM_001139977.1	CEF-10	1.24565	1.89445e-05	0.000246806
LOC106583432	LOC106583432	XM_014167588.1	interferon-induced protein 44-like	1.24395	1.63141e-16	6.99098e-14
LOC106576389	LOC106576389	NA	NA	1.24218	0.000168421	0.00146395
LOC106577395	LOC106577395	XM_014155366.1	DNA damage-inducible transcript 4 protein-like	1.24047	0.000255234	0.00204102
LOC100195784	lincr	NM_001140813.1	E3 ubiquitin-protein ligase LINCR	1.23771	0.000946032	0.00580619
LOC106575428	LOC106575428	NA	NA	1.23665	2.97639e-06	5.35156e-05
LOC106579322	LOC106579322	XM_014159140.1	uncharacterized LOC106579322	1.23653	0.000115371	0.00107033
LOC106608758	LOC106608758	XM_014206880.1	uncharacterized LOC106608758%2C transcript variant X1	1.23418	1.16256e-17	6.97461e-15
LOC106579692	LOC106579692	XM_014159827.1	probable polyketide synthase 1	1.23416	1.1348e-07	3.41417e-06
LOC106604363	LOC106604363	XM_014198919.1	LRRN4 C-terminal-like protein	1.23205	2.14354e-13	3.74557e-11
LOC106608842	LOC106608842	NA	NA	1.23131	8.35728e-10	5.22272e-08
LOC106567224	LOC106567224	XM_014136255.1	EMILIN-3-like	1.23104	3.13463e-09	1.62585e-07
LOC100196106	nrt1	NM_001141135.1	NADP+--arginine ADP-ribosyltransferase 1	1.22877	2.71955e-07	7.17397e-06
LOC106609424	LOC106609424	XM_014208243.1	uncharacterized LOC106609424	1.22742	0.00135689	0.00770267
LOC106560917	LOC106560917	XM_014124361.1	olfactomedin-4-like	1.22397	0.000195186	0.00164851
LOC106612265	LOC106612265	XM_014213269.1	TSC22 domain family protein 3-like%2C transcript variant X2	1.22311	1.07473e-10	8.67571e-09
LOC100194971	aqp1	NM_001140000.1	Aquaporin-1	1.21846	0.000419769	0.00303963
LOC106566237	LOC106566237	XM_014134128.1	5-aminolevulinate synthase%2C nonspecific%2C mitochondrial-like%2C transcript variant X2	1.21787	2.40104e-17	1.21729e-14
LOC106592986	LOC106592986	XM_014184334.1	immunoglobulin lambda-like polypeptide 1	1.21616	1.43335e-06	2.87437e-05
LOC106609055	LOC106609055	XM_014207419.1	ras-related protein Rab-38-like%2C transcript variant X3	1.21341	2.0755e-09	1.13196e-07
LOC106606171	LOC106606171	XM_014202303.1	beta-microseminoprotein-like	1.21228	2.12431e-06	4.02455e-05
LOC106602034	LOC106602034	XM_014194482.1	mannose-binding protein C-like	1.20944	0.000169369	0.00147048
LOC100195999	cxl10	XM_014127947.1	C-X-C motif chemokine 10%2C transcript variant X1	1.20766	1.25837e-09	7.37726e-08
LOC106597540	LOC106597540	NA	NA	1.20701	8.46783e-05	0.000832354
LOC106601313	LOC106601313	XM_014193421.1	ral guanine nucleotide dissociation stimulator-like 1	1.20646	4.2507e-15	1.22407e-12
LOC106565781	LOC106565781	XM_014133291.1	ubiquitin carboxyl-terminal hydrolase CYLD-like%2C transcript variant X3	1.20617	1.31631e-16	5.82217e-14
LOC106574108	LOC106574108	XM_014149696.1	endonuclease domain-containing 1 protein-like	1.20495	1.69866e-07	4.7957e-06
LOC106586879	LOC106586879	XM_014174605.1	mast cell protease 1A-like	1.20467	2.12136e-06	4.02109e-05
LOC106584756	LOC106584756	XM_014170303.1	zymogen granule membrane protein 16-like%2C transcript variant X2	1.20315	0.000143115	0.00127862
LOC106590650	LOC106590650	XM_014181789.1	immediate early response gene 2 protein-like	1.20303	0.000206271	0.00172613
LOC106590246	LOC106590246	XM_014181049.1	patched domain-containing protein 3-like	1.19973	4.77274e-10	3.17853e-08
LOC106588304	LOC106588304	NA	NA	1.19933	2.36263e-05	0.000293766
LOC106584097	LOC106584097	XM_014168931.1	forkhead box protein Q1-like	1.19827	7.39748e-11	6.20699e-09
LOC106568722	LOC106568722	XM_014139304.1	cAMP-specific 3'%2C5'-cyclic phosphodiesterase 4B-like%2C transcript variant X3	1.19637	5.85182e-17	2.80856e-14
LOC106583433	LOC106583433	XM_014167591.1	interferon-induced protein 44-like%2C transcript variant X3	1.19565	2.03082e-09	1.11435e-07
LOC106607345	LOC106607345	NA	NA	1.19495	2.04772e-12	2.63249e-10
LOC106578048	LOC106578048	XM_014156612.1	ras-related protein Rab-38-like	1.19469	3.35139e-07	8.57404e-06
LOC106580571	LOC106580571	XM_014161772.1	chondroitin sulfate N-acetylgalactosaminyltransferase 1-like%2C transcript variant X2	1.19168	1.28928e-08	5.44067e-07
LOC100286544	nmes1	NM_001146483.1	Normal mucosa of esophagus-specific gene 1 protein	1.18895	6.71035e-11	5.69684e-09
LOC106604810	LOC106604810	XM_014199854.1	cytochrome b-245 heavy chain-like	1.18861	1.12173e-09	6.68508e-08
LOC106561247	adm2	XM_014124987.1	adrenomedullin 2%2C transcript variant X2	1.18815	1.37253e-08	5.73818e-07
LOC106579703	LOC106579703	XM_014159841.1	patched domain-containing protein 3-like	1.18613	4.84807e-08	1.6861e-06
LOC106591927	LOC106591927	XM_014183194.1	suppressor of cytokine signaling 1-like	1.18262	5.5443e-20	5.86978e-17
LOC106577212	LOC106577212	XR_001322079.1	uncharacterized LOC106577212%2C transcript variant X1	1.17964	5.02362e-11	4.42127e-09
LOC106601034	LOC106601034	XM_014192902.1	complement C1q-like protein 2	1.17957	1.97038e-08	7.75144e-07
LOC106563843	LOC106563843	XM_014129744.1	uncharacterized LOC106563843	1.16989	1.00553e-05	0.00014834
LOC106579686	LOC106579686	XR_001322707.1	uncharacterized LOC106579686	1.16857	1.12434e-08	4.82381e-07
LOC106586600	LOC106586600	XM_014174054.1	3 beta-hydroxysteroid dehydrogenase/Delta 5-->4-isomerase-like	1.16816	1.50616e-10	1.17097e-08
LOC106589863	LOC106589863	XM_014180268.1	transmembrane protease serine 9-like	1.16796	6.20559e-14	1.29119e-11
LOC106611159	LOC106611159	XM_014211065.1	B2 bradykinin receptor-like	1.16173	2.87623e-07	7.51326e-06
LOC106580552	LOC106580552	XM_014161738.1	bone morphogenetic protein 10-like	1.16141	2.30145e-05	0.000287757
LOC100286473	cq067	NM_001146412.1	CQ067 protein	1.16128	6.68027e-08	2.17614e-06
LOC106569327	LOC106569327	XM_014140565.1	aquaporin FA-CHIP-like	1.15944	7.15526e-10	4.55054e-08
LOC106598164	LOC106598164	XM_014189230.1	serine protease 27-like	1.15593	4.32272e-13	6.94645e-11
LOC106576340	LOC106576340	NA	NA	1.15556	0.000714541	0.00464439
LOC106583595	LOC106583595	XR_001323566.1	uncharacterized LOC106583595	1.15356	8.24331e-06	0.000124937
LOC106606429	LOC106606429	XM_014202622.1	suppressor of cytokine signaling 3-like	1.15347	1.61358e-14	4.10304e-12
LOC106599427	LOC106599427	XM_014190655.1	suppressor of cytokine signaling 1-like	1.1519	3.44727e-16	1.34878e-13
LOC100194965	ef2	XM_014169273.1	Elongation factor 2%2C transcript variant X1	1.1513	4.29917e-41	5.15844e-37
LOC106590517	LOC106590517	XM_014181604.1	uncharacterized serine-rich protein C215.13-like%2C transcript variant X1	1.15126	2.49606e-09	1.33515e-07
LOC106565579	LOC106565579	XM_014132857.1	uncharacterized LOC106565579	1.15109	8.27103e-07	1.83221e-05
LOC100380777	matn1	XM_014178125.1	matrilin 1%2C cartilage matrix protein%2C transcript variant X1	1.15002	3.70879e-05	0.000424894
LOC106591805	LOC106591805	XM_014183067.1	uncharacterized LOC106591805	1.15	1.37009e-05	0.000190932
LOC106581689	LOC106581689	XM_014163919.1	sialoadhesin-like	1.14884	5.86823e-05	0.000616862
LOC106575840	LOC106575840	XM_014152536.1	OX-2 membrane glycoprotein-like	1.14458	7.15866e-09	3.31212e-07
LOC106574712	LOC106574712	XR_001321575.1	uncharacterized LOC106574712	1.14252	0.000101393	0.000963657
LOC106563217	LOC106563217	XM_014128574.1	protein KIAA1045 homolog%2C transcript variant X2	1.13768	7.82603e-07	1.74431e-05
LOC106594998	LOC106594998	XR_001326255.1	caspase-14-like%2C transcript variant X1	1.13737	2.25392e-05	0.000283311
LOC106599956	LOC106599956	XM_014191289.1	hemagglutinin/amebocyte aggregation factor-like	1.1356	1.50495e-05	0.000205587
LOC100136438	LOC100136438	NM_001123572.1	RhAG-like protein	1.13454	2.14408e-07	5.90835e-06
LOC101448011	hbb1	NM_001279018.1	Hemoglobin subunit beta-1	1.13353	1.18749e-07	3.52679e-06
LOC106603577	LOC106603577	XM_014197436.1	very-long-chain 3-oxoacyl-CoA reductase-like%2C transcript variant X1	1.13219	1.02664e-12	1.47819e-10
LOC106576453	LOC106576453	XM_014153646.1	uncharacterized PE-PGRS family protein PE_PGRS24-like%2C transcript variant X2	1.13109	6.94112e-05	0.000706123
LOC100195775	hce1	NM_001140804.1	High choriolytic enzyme 1	1.13106	1.82895e-10	1.36871e-08
LOC106604469	ky	XM_014199108.1	kyphoscoliosis peptidase	1.12971	0.000493524	0.00346227
LOC106609487	LOC106609487	NA	NA	1.12949	0.000217589	0.00179641
LOC106566508	LOC106566508	XM_014134598.1	extracellular matrix protein 2-like%2C transcript variant X2	1.12942	4.24959e-06	7.15843e-05
LOC106612812	LOC106612812	XM_014214328.1	P2X purinoceptor 5-like	1.12742	2.02475e-17	1.04118e-14
LOC106581919	egfl6	XM_014164385.1	EGF-like-domain%2C multiple 6%2C transcript variant X3	1.12734	6.77062e-12	7.63997e-10
LOC106572600	LOC106572600	XM_014146932.1	melanocyte protein PMEL-like	1.12553	7.16228e-08	2.30191e-06
LOC106585566	LOC106585566	XM_014171936.1	neurofilament light polypeptide-like%2C transcript variant X2	1.12387	4.69517e-10	3.14725e-08
LOC106577782	LOC106577782	XM_014156123.1	uncharacterized LOC106577782	1.12201	9.73674e-14	1.92573e-11
LOC106585882	LOC106585882	XM_014172601.1	C-C motif chemokine 4-like	1.12192	5.35827e-07	1.25816e-05
LOC106591804	LOC106591804	XM_014183066.1	cis-aconitate decarboxylase-like	1.12093	1.24858e-06	2.56382e-05
LOC106613270	LOC106613270	XM_014215357.1	1-phosphatidylinositol 4%2C5-bisphosphate phosphodiesterase eta-1-like	1.12065	0.000822708	0.00519912
LOC106572840	LOC106572840	XM_014147369.1	transmembrane emp24 domain-containing protein 4-like	1.11789	5.2739e-09	2.55504e-07
LOC100196572	ddn1	NM_001141601.1	Duodenase-1	1.11726	9.60545e-13	1.39418e-10
LOC106570826	LOC106570826	XM_014143375.1	MAM domain-containing protein 2-like	1.11694	2.61311e-09	1.38931e-07
LOC106579498	LOC106579498	XM_014159443.1	eotaxin-like	1.11689	2.78108e-05	0.000336384
LOC106586891	LOC106586891	XM_014174618.1	interferon-induced GTP-binding protein Mx2-like	1.11597	2.97905e-08	1.11123e-06
LOC106570903	LOC106570903	XM_014143478.1	granzyme A-like	1.1156	7.41926e-13	1.11276e-10
LOC106607840	LOC106607840	XM_014205257.1	uncharacterized LOC106607840%2C transcript variant X1	1.11504	7.45616e-07	1.67524e-05
LOC106570254	LOC106570254	XM_014142365.1	endothelin-2-like	1.11444	2.00866e-06	3.83982e-05
LOC106564722	LOC106564722	XM_014131008.1	uncharacterized LOC106564722	1.11241	0.00021726	0.00179493
LOC106587392	LOC106587392	XM_014175744.1	ammonium transporter Rh type C	1.10893	6.71479e-19	5.14267e-16
LOC106581246	LOC106581246	XR_001323052.1	uncharacterized LOC106581246	1.10623	1.65186e-05	0.000221042
LOC106560797	LOC106560797	XM_014124116.1	cathepsin L1-like	1.1054	6.31587e-11	5.413e-09
LOC106575637	LOC106575637	XM_014152249.1	intermediate filament protein ON3-like%2C transcript variant X5	1.10239	1.2527e-06	2.56796e-05
LOC106606868	LOC106606868	XM_014203275.1	GTPase IMAP family member 8-like	1.09923	6.48568e-06	0.000102574
LOC100136589	LOC100136589	NM_001123677.1	metallothionein A	1.09848	1.00097e-11	1.08855e-09
LOC106579698	LOC106579698	XM_014159832.1	probable polyketide synthase 1	1.09796	1.43919e-05	0.000198563
LOC100306754	cxcr4	NM_001165293.1	C-X-C chemokine receptor type 4	1.09723	5.72929e-07	1.3357e-05
LOC106582243	LOC106582243	XR_001323276.1	uncharacterized LOC106582243	1.09272	9.72309e-08	2.98883e-06
LOC106596088	LOC106596088	XM_014187410.1	suppressor of cytokine signaling 1-like	1.09268	6.51871e-13	1.00707e-10
LOC106582199	LOC106582199	XM_014165038.1	interferon-induced guanylate-binding protein 1-like	1.08904	1.61972e-09	9.12417e-08
LOC106566837	LOC106566837	XM_014135294.1	extracellular matrix protein 2-like	1.08622	4.48072e-07	1.08611e-05
LOC100286643	leg4	NM_001146582.1	Galectin-4	1.08419	1.3957e-12	1.88871e-10
LOC106609985	LOC106609985	XR_001329815.1	uncharacterized LOC106609985%2C transcript variant X2	1.08371	1.4261e-09	8.27964e-08
LOC106564846	LOC106564846	XM_014131306.1	proactivator polypeptide-like	1.08092	1.26652e-05	0.000178085
LOC106567225	LOC106567225	XM_014136259.1	sterile alpha motif domain-containing protein 10-like%2C transcript variant X3	1.07882	8.86574e-07	1.93765e-05
LOC106585763	LOC106585763	XM_014172349.1	versican core protein-like%2C transcript variant X2	1.07879	3.71528e-05	0.000425231
LOC106608318	LOC106608318	XM_014206199.1	neuronal acetylcholine receptor subunit alpha-2-like	1.07739	0.000823158	0.00520105
LOC100195613	mb	NM_001140642.1	myoglobin	1.07726	6.94235e-05	0.000706123
LOC106595317	LOC106595317	XR_001326367.1	C-type lectin domain family 4 member C-like%2C transcript variant X2	1.07633	0.000364451	0.00270546
LOC106582198	LOC106582198	XM_014165037.1	guanylate-binding protein 5-like	1.07627	7.64495e-09	3.49162e-07
LOC106570802	LOC106570802	XM_014143338.1	calcium/calmodulin-dependent protein kinase type II subunit beta-like%2C transcript variant X1	1.07572	3.32864e-09	1.71659e-07
LOC100286697	cxb5	NM_001146638.1	Gap junction beta-5 protein	1.07475	0.000357326	0.00266411
LOC106601647	LOC106601647	XM_014193989.1	band 3 anion exchange protein-like	1.06951	7.7995e-10	4.91683e-08
LOC106567948	LOC106567948	XM_014137863.1	diacylglycerol O-acyltransferase 2-like	1.06823	0.00136425	0.00773449
LOC106606075	LOC106606075	XM_014202171.1	uncharacterized LOC106606075%2C transcript variant X2	1.0629	1.0281e-13	2.02227e-11
LOC106606856	LOC106606856	XM_014203255.1	band 3 anion exchange protein-like%2C transcript variant X1	1.06158	2.19183e-09	1.19e-07
LOC106590296	LOC106590296	XM_014181145.1	patched domain-containing protein 3-like%2C transcript variant X1	1.05971	1.68409e-08	6.81895e-07
LOC106609599	LOC106609599	XM_014208563.1	forkhead box protein J1-B-like%2C transcript variant X2	1.05842	1.08882e-07	3.29077e-06
LOC106562874	LOC106562874	XM_014127936.1	alpha-N-acetylgalactosaminide alpha-2%2C6-sialyltransferase 6-like%2C transcript variant X3	1.05767	7.41543e-10	4.6994e-08
LOC106570980	LOC106570980	XM_014143595.1	high mobility group nucleosome-binding domain-containing protein 3-like%2C transcript variant X3	1.05661	0.000184077	0.00156792
LOC106602902	LOC106602902	XM_014195888.1	E3 ubiquitin-protein ligase TRIM39-like	1.05328	0.000138706	0.00124681
LOC106610840	LOC106610840	XM_014210458.1	formin-like%2C transcript variant X1	1.05233	7.78757e-05	0.000778671
LOC106598149	LOC106598149	XM_014189215.1	interferon-induced guanylate-binding protein 1-like	1.05207	1.78116e-07	5.01077e-06
LOC106571324	LOC106571324	XM_014144262.1	collagen alpha-1(X) chain-like	1.05001	4.05227e-11	3.66496e-09
LOC106581089	LOC106581089	XM_014162803.1	uncharacterized LOC106581089	1.04944	1.04482e-15	3.61629e-13
LOC106600723	LOC106600723	XM_014192301.1	tryptase-like	1.04884	7.06187e-09	3.27154e-07
LOC106596968	LOC106596968	XR_001326805.1	uncharacterized LOC106596968	1.04824	6.23009e-08	2.07071e-06
LOC106610428	LOC106610428	XR_001329904.1	uncharacterized LOC106610428	1.04668	0.000280355	0.00219814
LOC100196737	tri39	NM_001141759.1	Tripartite motif-containing protein 39	1.04634	5.36616e-16	2.0549e-13
LOC100194953	irf4	NM_001139982.1	Interferon regulatory factor 4	1.04384	9.60563e-09	4.22179e-07
LOC106575701	LOC106575701	XM_014152342.1	uncharacterized LOC106575701%2C transcript variant X2	1.04347	1.14155e-12	1.61776e-10
LOC106589334	LOC106589334	XM_014179178.1	dexamethasone-induced Ras-related protein 1-like	1.03919	0.000307693	0.00236495
LOC106584549	LOC106584549	XM_014169971.1	receptor-type tyrosine-protein phosphatase zeta-like%2C transcript variant X4	1.03857	7.31232e-10	4.64223e-08
LOC100380859	LOC100380859	XM_014194002.1	band 3 anion exchange protein	1.03799	2.33768e-09	1.25969e-07
LOC106596969	LOC106596969	XR_001326806.1	uncharacterized LOC106596969	1.03793	7.62407e-05	0.000765512
LOC106576385	LOC106576385	NA	NA	1.03789	0.000195447	0.00165032
LOC106576903	LOC106576903	NA	NA	1.03308	0.00127289	0.00734751
LOC106612415	LOC106612415	XR_001330293.1	uncharacterized LOC106612415	1.03268	7.24933e-09	3.34299e-07
LOC106588455	LOC106588455	XM_014177484.1	C3a anaphylatoxin chemotactic receptor-like%2C transcript variant X1	1.03086	7.05001e-12	7.88112e-10
LOC106589080	LOC106589080	XM_014178757.1	gap junction beta-3 protein-like	1.0285	7.04251e-10	4.49472e-08
LOC106572191	LOC106572191	XM_014146135.1	angiopoietin-related protein 7-like	1.02707	1.316e-19	1.18427e-16
LOC106572480	LOC106572480	XM_014146703.1	CCAAT/enhancer-binding protein beta-like	1.02562	2.44327e-05	0.00030233
LOC106605611	LOC106605611	XM_014201445.1	uncharacterized LOC106605611%2C transcript variant X1	1.02446	6.77862e-07	1.54923e-05
LOC106588456	LOC106588456	XM_014177089.1	myelin associated glycoprotein%2C transcript variant X3	1.0218	4.95739e-09	2.43447e-07
LOC106579606	LOC106579606	XM_014159681.1	polymeric immunoglobulin receptor-like	1.02156	3.15159e-06	5.59546e-05
LOC106588303	LOC106588303	NA	NA	1.0184	0.00017454	0.00150521
LOC106608515	pcolce	XM_014206462.1	procollagen C-endopeptidase enhancer	1.01698	1.17602e-07	3.50141e-06
LOC106583430	LOC106583430	XM_014167581.1	interferon-induced protein 44-like%2C transcript variant X1	1.01443	0.00165693	0.00896616
LOC106612608	prss16	XM_014213931.1	protease%2C serine%2C 16 (thymus)%2C transcript variant X3	1.01364	6.53506e-09	3.07097e-07
LOC106584829	map2k1	XM_014170426.1	mitogen-activated protein kinase kinase 1	1.01359	1.92302e-06	3.69771e-05
LOC100194970	ctgf	NM_001139999.1	connective tissue growth factor	1.01339	2.6304e-07	6.96204e-06
LOC106588185	LOC106588185	XM_014176921.1	cellular retinoic acid-binding protein 2-like	1.01275	1.33018e-06	2.69905e-05
LOC106591057	LOC106591057	XR_001325180.1	uncharacterized LOC106591057	1.01261	5.38463e-09	2.59984e-07
LOC100194884	cebpb	NM_001139913.1	CCAAT/enhancer binding protein (C/EBP)%2C beta	1.01138	3.51718e-07	8.92837e-06
LOC100196008	graa	NM_001141037.1	Granzyme A	1.01096	3.43813e-09	1.76013e-07
LOC106560573	plvap	XM_014123581.1	plasmalemma vesicle associated protein	1.00994	2.5869e-07	6.86206e-06
LOC106584297	LOC106584297	XM_014169376.1	collagen alpha-6(VI) chain-like%2C transcript variant X4	1.00956	5.59987e-09	2.67693e-07
LOC106586888	LOC106586888	XM_014174615.1	interferon-induced GTP-binding protein Mx-like	1.00767	0.000250102	0.00200907
LOC106564720	LOC106564720	XM_014131006.1	C-X-C motif chemokine 11-like	1.00704	2.88793e-13	4.88047e-11
LOC106581884	LOC106581884	XM_014164325.1	C-X-C chemokine receptor type 1-like	1.00525	4.29365e-07	1.04925e-05
LOC106578249	LOC106578249	XM_014156906.1	B-cell receptor CD22-like	1.00381	1.06264e-08	4.59388e-07
LOC106570043	LOC106570043	XM_014141971.1	PR domain zinc finger protein 1-like%2C transcript variant X2	1.0035	4.04485e-14	8.87795e-12
LOC106601717	LOC106601717	NA	NA	1.00266	0.000863972	0.00540673
LOC106560584	mfi2	XM_014123614.1	antigen p97 (melanoma associated) identified by monoclonal antibodies 133.2 and 96.5	1.00124	1.68025e-08	6.81108e-07
LOC106570145	phyhd1	XM_014142181.1	phytanoyl-CoA dioxygenase domain containing 1	1.00099	8.25419e-06	0.00012505
LOC106573975	slc5a5	XM_014149454.1	solute carrier family 5 (sodium/iodide cotransporter)%2C member 5%2C transcript variant X2	-1.00015	3.8096e-05	0.000434094
LOC106591193	LOC106591193	XM_014182407.1	multidrug resistance protein 1-like%2C transcript variant X1	-1.00021	2.31249e-11	2.24974e-09
LOC106606857	LOC106606857	NA	NA	-1.00037	6.59637e-09	3.08428e-07
LOC106570645	epb41	XM_014143115.1	erythrocyte membrane protein band 4.1%2C transcript variant X2	-1.00055	3.72271e-06	6.40855e-05
LOC106611589	LOC106611589	XM_014211962.1	leukocyte cell-derived chemotaxin-2-like%2C transcript variant X1	-1.00181	1.7257e-05	0.000229132
LOC106593248	LOC106593248	XM_014184591.1	glutenin%2C high molecular weight subunit PW212-like	-1.0028	0.00106579	0.00639512
LOC106586629	LOC106586629	XM_014174119.1	sodium/myo-inositol cotransporter-like	-1.00311	2.92527e-14	6.83754e-12
LOC106568016	LOC106568016	XM_014138005.1	histone-lysine N-methyltransferase%2C H3 lysine-36 and H4 lysine-20 specific-like%2C transcript variant X4	-1.0053	7.07663e-07	1.60511e-05
LOC106595535	LOC106595535	XM_014186906.1	alsin-like	-1.0068	0.00120415	0.00702503
LOC106586621	LOC106586621	XR_001324226.1	uncharacterized LOC106586621%2C transcript variant X1	-1.0088	2.45871e-07	6.59493e-06
LOC106604355	LOC106604355	XM_014198909.1	vascular endothelial growth factor A-A-like	-1.00949	1.26863e-12	1.75637e-10
LOC106598465	LOC106598465	XR_001327193.1	uncharacterized LOC106598465	-1.0104	1.61529e-08	6.58484e-07
LOC106595371	LOC106595371	XM_014186740.1	oxysterol-binding protein-related protein 3-like	-1.01169	6.64716e-05	0.000681879
LOC106570700	LOC106570700	XM_014143173.1	transmembrane protein 56-B-like	-1.0128	4.43078e-07	1.07771e-05
LOC106570539	LOC106570539	XM_014142978.1	DNA-binding protein SATB1-like%2C transcript variant X1	-1.01527	1.44635e-07	4.1851e-06
LOC106584803	LOC106584803	XM_014170401.1	ras-related protein Rab-6.2-like	-1.01622	4.0039e-06	6.81439e-05
LOC106609375	LOC106609375	XM_014208151.1	thioredoxin reductase 1%2C cytoplasmic-like%2C transcript variant X1	-1.01671	0.000300181	0.00232073
LOC106592223	LOC106592223	XM_014183541.1	kinesin-like protein KIF13A	-1.01707	0.000170443	0.00147767
LOC106585770	LOC106585770	XM_014172366.1	transmembrane protein 161B-like%2C transcript variant X1	-1.01732	2.26484e-05	0.000284224
LOC106610632	LOC106610632	XM_014210063.1	MAPK/MAK/MRK overlapping kinase-like%2C transcript variant X4	-1.01926	1.82402e-12	2.3789e-10
LOC106589658	LOC106589658	XM_014179900.1	actin%2C alpha skeletal muscle 2-like	-1.01977	0.00025221	0.00202195
LOC106611739	LOC106611739	XM_014212262.1	phosphatidylinositol 3%2C4%2C5-trisphosphate 5-phosphatase 2B-like%2C transcript variant X1	-1.02081	7.37192e-20	7.17188e-17
LOC106599019	LOC106599019	XM_014190065.1	multidrug resistance protein 1-like	-1.0209	9.94823e-11	8.19443e-09
LOC106594453	LOC106594453	XM_014185825.1	uncharacterized LOC106594453	-1.02099	3.44533e-06	6.01357e-05
LOC106593362	LOC106593362	XM_014184701.1	uncharacterized LOC106593362	-1.02205	0.0010366	0.00624806
LOC100380588	tbb2a	NM_001173873.1	Tubulin beta-2A chain	-1.02306	8.61074e-10	5.37179e-08
LOC106599092	LOC106599092	XM_014190155.1	rab effector MyRIP-like	-1.02371	0.000245135	0.00197845
LOC106586420	LOC106586420	XM_014173654.1	sterol 26-hydroxylase%2C mitochondrial-like%2C transcript variant X1	-1.02424	4.41667e-12	5.17858e-10
LOC106603059	LOC106603059	XR_001328363.1	uncharacterized LOC106603059%2C transcript variant X2	-1.02643	1.71504e-05	0.000228139
LOC106578496	LOC106578496	XM_014157359.1	retinal-specific ATP-binding cassette transporter-like	-1.02741	0.000277702	0.00218067
LOC106565874	LOC106565874	XM_014133508.1	complement decay-accelerating factor-like%2C transcript variant X2	-1.02866	3.33545e-09	1.71764e-07
LOC106592807	LOC106592807	XM_014184140.1	high-affinity choline transporter 1-like	-1.03106	4.95003e-10	3.28142e-08
LOC106595624	LOC106595624	XM_014186990.1	uncharacterized protein KIAA0556-like%2C transcript variant X2	-1.03232	0.000825709	0.00521351
LOC106610505	LOC106610505	XM_014209888.1	von Willebrand factor A domain-containing protein 7-like%2C transcript variant X2	-1.03637	4.63972e-08	1.63097e-06
LOC106597699	LOC106597699	XM_014188855.1	high-affinity choline transporter 1-like	-1.03732	1.34293e-06	2.72032e-05
LOC106564740	LOC106564740	XM_014131049.1	neuroblast differentiation-associated protein AHNAK-like%2C transcript variant X1	-1.04246	3.43076e-12	4.14408e-10
LOC106613929	LOC106613929	XM_014216749.1	uncharacterized LOC106613929	-1.04304	0.00136333	0.00773325
LOC106579309	LOC106579309	XM_014159119.1	tubulin polyglutamylase ttll6-like%2C transcript variant X1	-1.04538	8.36018e-08	2.62382e-06
LOC106604592	adad1	XM_014199379.1	adenosine deaminase domain containing 1 (testis-specific)%2C transcript variant X1	-1.04607	4.86778e-12	5.67057e-10
LOC106581367	LOC106581367	XM_014163384.1	high-affinity choline transporter 1-like	-1.04925	0.000522618	0.00361703
LOC106589123	LOC106589123	XM_014178821.1	protein FAM91A1-like	-1.04932	1.41008e-06	2.83402e-05
LOC106589891	LOC106589891	XM_014180304.1	inward rectifier potassium channel 16-like	-1.05167	0.000779882	0.00498375
LOC106581925	LOC106581925	XM_014164399.1	major facilitator superfamily domain-containing protein 6-like%2C transcript variant X1	-1.05561	1.06186e-08	4.59388e-07
LOC106560496	kank4	XM_014123459.1	KN motif and ankyrin repeat domains 4	-1.05606	7.31317e-09	3.362e-07
LOC106568659	LOC106568659	XR_001320370.1	uncharacterized LOC106568659%2C transcript variant X3	-1.05675	0.000581369	0.00394025
LOC106608940	LOC106608940	XM_014207184.1	acetylcholinesterase-like%2C transcript variant X2	-1.0585	1.03388e-05	0.000151714
LOC106605377	LOC106605377	XM_014200922.1	neural-cadherin-like	-1.05994	7.37357e-07	1.65912e-05
LOC106569513	LOC106569513	XM_014140941.1	receptor-type tyrosine-protein phosphatase S-like%2C transcript variant X11	-1.06493	1.62435e-11	1.6517e-09
LOC106602973	LOC106602973	XM_014196063.1	GTP cyclohydrolase 1-like	-1.06781	8.54537e-06	0.000128918
LOC106577139	LOC106577139	XM_014154903.1	protein ZNF365-like	-1.07058	3.90429e-06	6.67009e-05
LOC106612366	LOC106612366	XM_014213438.1	coagulation factor IX-like%2C transcript variant X2	-1.07098	1.53474e-17	8.37035e-15
LOC106575818	LOC106575818	XM_014152510.1	myosin light chain 3%2C skeletal muscle isoform-like	-1.07315	0.000626239	0.00417369
LOC106607819	LOC106607819	XM_014205197.1	gap junction epsilon-1 protein-like%2C transcript variant X4	-1.0761	2.71165e-06	4.94722e-05
LOC106595069	LOC106595069	XM_014186440.1	mucin-5B-like	-1.07934	0.00184918	0.00980746
LOC106569122	LOC106569122	XM_014140114.1	suppression of tumorigenicity 18 protein-like%2C transcript variant X7	-1.0797	2.25686e-05	0.000283553
LOC106584643	LOC106584643	XM_014170126.1	ankyrin-3-like	-1.08173	0.000572709	0.00388893
LOC106595864	LOC106595864	XM_014187212.1	mucin-5AC-like	-1.08579	0.00174661	0.00937672
LOC106597382	LOC106597382	XM_014188581.1	protein Jumonji-like	-1.08962	2.01525e-13	3.55593e-11
LOC106585949	LOC106585949	XM_014172702.1	WD repeat and FYVE domain-containing protein 3-like	-1.09322	7.02312e-09	3.26129e-07
LOC106580611	LOC106580611	XM_014161854.1	neural-cadherin-like	-1.09401	1.39157e-13	2.63637e-11
LOC106575244	LOC106575244	XM_014151633.1	rab GTPase-activating protein 1-like%2C isoform 10	-1.09499	2.79913e-12	3.4744e-10
LOC106594674	LOC106594674	XM_014186070.1	calmodulin-regulated spectrin-associated protein 3-like	-1.09572	0.000665696	0.00438149
LOC106584850	LOC106584850	XM_014170455.1	dnaJ homolog subfamily A member 4-like	-1.0958	4.65319e-11	4.14595e-09
LOC106604731	LOC106604731	XM_014199696.1	glycerophosphoinositol inositolphosphodiesterase GDPD2-like%2C transcript variant X3	-1.09661	2.13354e-08	8.24907e-07
LOC106592222	LOC106592222	XM_014183540.1	mucin-5B-like	-1.09799	0.00170135	0.00917479
LOC106599102	LOC106599102	XM_014190316.1	nesprin-2-like%2C transcript variant X13	-1.09907	2.07367e-16	8.78163e-14
LOC106613213	LOC106613213	XM_014215253.1	cholinesterase-like%2C transcript variant X4	-1.10567	1.03312e-15	3.6105e-13
LOC106602893	LOC106602893	NA	NA	-1.10784	7.74523e-07	1.72951e-05
LOC106569718	LOC106569718	XM_014141289.1	piezo-type mechanosensitive ion channel component 2-like	-1.10806	1.08216e-05	0.000157261
LOC106581425	LOC106581425	XM_014163482.1	P2Y purinoceptor 3-like	-1.10938	9.56892e-07	2.04782e-05
LOC106586409	LOC106586409	XM_014173643.1	5-hydroxytryptamine receptor 1F-like	-1.11214	2.25361e-06	4.23608e-05
LOC106585953	LOC106585953	XM_014172706.1	WD repeat and FYVE domain-containing protein 3-like	-1.1173	1.37821e-06	2.77949e-05
LOC106564147	LOC106564147	XM_014130162.1	endogenous retrovirus group 3 member 1 Env polyprotein-like%2C transcript variant X1	-1.1212	4.16145e-09	2.09212e-07
LOC106573666	LOC106573666	XM_014148932.1	carbohydrate sulfotransferase 6-like%2C transcript variant X10	-1.12134	2.32471e-12	2.94649e-10
LOC106575088	LOC106575088	XM_014151268.1	parathyroid hormone 2 receptor-like%2C transcript variant X1	-1.12443	0.000249294	0.00200393
LOC106587569	LOC106587569	XM_014176086.1	glucose-6-phosphate isomerase-like	-1.12737	0.0013228	0.00756765
LOC106598936	LOC106598936	XM_014189964.1	mucin-2-like	-1.13105	0.000535533	0.00368683
LOC106583179	LOC106583179	XM_014167075.1	prostacyclin synthase-like	-1.13302	5.39527e-09	2.59984e-07
LOC106577912	LOC106577912	XM_014156364.1	tudor domain-containing protein 7B-like%2C transcript variant X4	-1.13669	4.51273e-11	4.0408e-09
LOC106597518	LOC106597518	XM_014188697.1	mucin-2-like	-1.13783	0.00112985	0.006684
LOC106570062	LOC106570062	XM_014142012.1	sperm acrosome membrane-associated protein 4-like	-1.14223	7.13956e-14	1.45195e-11
LOC106566179	sp7	XM_014134053.1	Sp7 transcription factor	-1.14495	1.12388e-13	2.18677e-11
LOC106574125	ankub1	XM_014149742.1	ankyrin repeat and ubiquitin domain containing 1	-1.15915	0.00054815	0.00375332
LOC106583790	slc6a1	XM_014168363.1	solute carrier family 6 (neurotransmitter transporter)%2C member 1	-1.16133	0.000779109	0.00498132
LOC106594816	LOC106594816	XM_014186201.1	mucin-5B-like	-1.16432	0.000844158	0.00530765
LOC106607170	LOC106607170	XM_014203826.1	uncharacterized LOC106607170%2C transcript variant X3	-1.16793	1.05076e-11	1.13926e-09
LOC106569415	LOC106569415	XM_014140755.1	myocilin-like	-1.17283	0.00112368	0.0066614
LOC106593294	LOC106593294	XM_014184632.1	mucin-5B-like	-1.17444	0.00104568	0.00629119
LOC106582909	LOC106582909	XR_001323404.1	uncharacterized LOC106582909	-1.17591	3.7309e-05	0.000426613
LOC106595693	LOC106595693	XR_001326442.1	uncharacterized LOC106595693	-1.18003	6.87181e-05	0.000700333
LOC106608703	LOC106608703	NA	NA	-1.18055	3.51739e-05	0.000407532
LOC106576778	LOC106576778	XM_014154177.1	gamma-aminobutyric acid receptor subunit pi-like%2C transcript variant X3	-1.18184	0.00128361	0.00739397
LOC106609915	LOC106609915	XM_014208958.1	sialic acid synthase-like	-1.18457	6.25988e-07	1.43889e-05
LOC106606807	LOC106606807	XM_014203173.1	protein phosphatase 1 regulatory subunit 29-like%2C transcript variant X4	-1.18504	0.000193884	0.00163866
LOC106562982	LOC106562982	XM_014128150.1	NK1 transcription factor-related protein 2-like	-1.18803	0.000541794	0.003719
LOC106589855	LOC106589855	XM_014180252.1	uncharacterized LOC106589855	-1.18947	1.74009e-12	2.28599e-10
LOC106565880	LOC106565880	XM_014133516.1	vomeronasal type-1 receptor 4-like	-1.1914	6.72489e-13	1.03008e-10
LOC106608908	LOC106608908	XM_014207119.1	kelch-like protein 33	-1.19347	0.00128208	0.00738634
LOC106570851	LOC106570851	XM_014143422.1	protein unc-13 homolog B-like	-1.1949	2.39798e-07	6.45739e-06
LOC106569240	LOC106569240	XM_014140424.1	calcium/calmodulin-dependent protein kinase type II subunit beta-like%2C transcript variant X2	-1.19503	6.0187e-08	2.0116e-06
LOC106597400	LOC106597400	XM_014188593.1	mucin-2-like	-1.19841	0.000751068	0.00483462
LOC106591914	LOC106591914	XR_001325522.1	uncharacterized LOC106591914	-1.21523	8.38065e-09	3.75211e-07
LOC106569231	LOC106569231	XM_014140391.1	transient receptor potential cation channel subfamily A member 1-like	-1.21868	2.3482e-16	9.71559e-14
LOC106613063	LOC106613063	XM_014214947.1	chloride channel protein 2-like	-1.22136	0.000827989	0.00522424
LOC106610731	LOC106610731	XM_014210245.1	protein GREB1-like	-1.22535	0.000310564	0.00238157
LOC106604542	LOC106604542	XM_014199280.1	fibroblast growth factor-binding protein 1-like	-1.22683	3.56973e-08	1.29402e-06
LOC106612628	LOC106612628	XM_014213970.1	membrane frizzled-related protein-like%2C transcript variant X1	-1.23527	0.000219707	0.00181015
LOC106595905	LOC106595905	XM_014187246.1	FYVE%2C RhoGEF and PH domain-containing protein 1-like	-1.23712	0.000375995	0.00277684
LOC106597358	LOC106597358	XM_014188557.1	mucin-2-like	-1.24511	0.000428322	0.003091
LOC106602145	LOC106602145	XM_014194615.1	high-affinity choline transporter 1-like	-1.24868	1.06368e-10	8.66247e-09
LOC106594866	LOC106594866	XM_014186249.1	myosin heavy chain%2C fast skeletal muscle-like	-1.26522	0.000632623	0.00420689
LOC106597354	LOC106597354	XM_014188551.1	mucin-2-like	-1.27006	0.000154457	0.00136639
LOC106606820	LOC106606820	NA	NA	-1.27977	5.92406e-09	2.81323e-07
LOC106593856	LOC106593856	XM_014185242.1	papilin-like	-1.28139	9.44702e-07	2.0312e-05
LOC106580065	LOC106580065	XM_014160675.1	retinal dehydrogenase 1-like%2C transcript variant X2	-1.28489	7.21702e-08	2.31743e-06
LOC106600566	LOC106600566	XM_014192023.1	uncharacterized LOC106600566	-1.28575	5.34586e-15	1.50336e-12
LOC106594767	LOC106594767	XM_014186155.1	sialic acid synthase-like	-1.28985	5.35406e-08	1.81816e-06
LOC106594461	LOC106594461	XM_014185831.1	amine sulfotransferase-like	-1.29036	4.49948e-09	2.23398e-07
LOC106560418	adcyap1r1	XM_014123310.1	adenylate cyclase activating polypeptide 1 (pituitary) receptor type I%2C transcript variant X3	-1.29254	1.20549e-07	3.57437e-06
LOC106612646	LOC106612646	XM_014214006.1	cylicin-1-like%2C transcript variant X2	-1.29299	4.59964e-10	3.09474e-08
LOC106575644	LOC106575644	XM_014152259.1	C-X-C chemokine receptor type 2-like	-1.29397	0.00165736	0.00896713
LOC106573281	LOC106573281	XR_001321306.1	uncharacterized LOC106573281	-1.30232	0.00138004	0.00780363
LOC106593461	LOC106593461	XM_014184795.1	N-acetyllactosaminide beta-1%2C3-N-acetylglucosaminyltransferase 2-like	-1.30558	6.5937e-14	1.35627e-11
LOC106605176	LOC106605176	XM_014200558.1	uncharacterized protein YBL113C-like	-1.30743	3.10498e-15	9.23692e-13
LOC106585654	LOC106585654	XM_014172085.1	galactosylceramide sulfotransferase-like	-1.31723	3.83637e-12	4.58784e-10
LOC106602668	LOC106602668	XM_014195423.1	mucin-5AC-like	-1.32661	0.000112067	0.00104372
LOC106594459	LOC106594459	XM_014185830.1	amine sulfotransferase-like	-1.33262	1.14195e-09	6.78308e-08
LOC106609889	LOC106609889	XM_014208923.1	sialic acid synthase-like	-1.33665	9.97468e-11	8.19745e-09
LOC106581149	LOC106581149	XR_001323020.1	protein turtle homolog B-like%2C transcript variant X3	-1.34468	1.45932e-14	3.80651e-12
LOC106610249	LOC106610249	XM_014209504.1	monocarboxylate transporter 4-like%2C transcript variant X2	-1.34474	1.3463e-06	2.72562e-05
LOC106572804	LOC106572804	XR_001321192.1	uncharacterized LOC106572804	-1.34797	3.87657e-07	9.66352e-06
LOC106597903	LOC106597903	XM_014189016.1	mucin-5AC-like	-1.34918	0.00141849	0.00797811
LOC106597359	LOC106597359	XM_014188558.1	mucin-2-like	-1.35293	0.000406898	0.00296081
LOC106596899	LOC106596899	XM_014188152.1	myosin heavy chain%2C fast skeletal muscle-like	-1.36091	0.000556379	0.00380099
LOC106591470	LOC106591470	XR_001325348.1	uncharacterized LOC106591470%2C transcript variant X1	-1.36585	4.35925e-06	7.31542e-05
LOC106586232	LOC106586232	XM_014173317.1	nesprin-2-like	-1.37059	2.62303e-09	1.39056e-07
LOC106578743	LOC106578743	XM_014157881.1	uncharacterized LOC106578743	-1.37354	3.47043e-09	1.76943e-07
LOC106596816	LOC106596816	XM_014188077.1	myosin-2-like	-1.38872	0.000534219	0.00368227
LOC106560589	LOC106560589	XM_014123621.1	histidine-rich glycoprotein-like	-1.39607	2.51678e-14	6.06222e-12
LOC106561975	LOC106561975	XM_014126476.1	cathepsin L1-like	-1.40639	9.24705e-08	2.85714e-06
LOC106609152	LOC106609152	XM_014207634.1	arg8-vasotocin receptor-like%2C transcript variant X2	-1.40857	2.48034e-06	4.59172e-05
LOC106575827	il11	XM_014152529.1	interleukin 11%2C transcript variant X2	-1.42242	1.74284e-06	3.3856e-05
LOC106573043	LOC106573043	XM_014147666.1	L-lactate dehydrogenase A chain-like	-1.42683	0.00103447	0.0062394
LOC106584793	LOC106584793	XM_014170383.1	translation initiation factor IF-2-like	-1.43083	0.000619799	0.00413843
LOC106603248	LOC106603248	XM_014196629.1	protocadherin-10-like%2C transcript variant X5	-1.43275	1.25256e-13	2.41108e-11
LOC106565465	LOC106565465	XM_014132676.1	protein lifeguard 2-like%2C transcript variant X2	-1.43657	4.05415e-12	4.80043e-10
LOC106579993	LOC106579993	XM_014160514.1	voltage-dependent N-type calcium channel subunit alpha-1B-like%2C transcript variant X20	-1.43811	6.97741e-06	0.000109054
LOC106592150	LOC106592150	XM_014183461.1	mucin-5B-like	-1.45208	2.49087e-05	0.000307375
LOC106565648	LOC106565648	XM_014132980.1	transmembrane protein 88B-like%2C transcript variant X3	-1.46055	1.08498e-09	6.54184e-08
LOC106581715	LOC106581715	XM_014163994.1	glycine-rich cell wall structural protein-like%2C transcript variant X1	-1.46208	1.86341e-11	1.84781e-09
LOC106570180	LOC106570180	XM_014142219.1	extracellular matrix protein 1-like	-1.48748	1.11837e-06	2.34733e-05
LOC106593193	LOC106593193	XM_014184527.1	high affinity choline transporter 1-like	-1.49137	4.34176e-12	5.10738e-10
LOC106589857	LOC106589857	XM_014180257.1	caskin-2-like%2C transcript variant X4	-1.49147	2.40279e-13	4.15822e-11
LOC106597407	LOC106597407	XM_014188601.1	mucin-2-like	-1.50278	8.68582e-05	0.000849144
LOC106583889	LOC106583889	XM_014168515.1	heme-binding protein 2-like	-1.51193	3.12843e-06	5.57022e-05
LOC106565075	LOC106565075	NA	NA	-1.51545	1.25614e-07	3.70017e-06
LOC106577826	LOC106577826	XM_014156187.1	kelch-like protein 33	-1.51954	0.000141335	0.00126617
LOC106562772	LOC106562772	XM_014127772.1	neuronal acetylcholine receptor subunit alpha-7-like%2C transcript variant X2	-1.53004	1.41305e-21	2.11935e-18
LOC106576863	LOC106576863	XM_014154360.1	mitogen-activated protein kinase 8-like%2C transcript variant X2	-1.54587	9.21543e-09	4.07017e-07
LOC106608237	LOC106608237	XM_014206076.1	isthmin-2-like%2C transcript variant X3	-1.55246	5.07483e-14	1.06827e-11
LOC106593043	LOC106593043	XM_014184386.1	protein asteroid homolog 1-like	-1.57739	4.87139e-07	1.16512e-05
LOC100194577	ldb3	NM_001139663.1	LIM domain binding 3	-1.58191	0.00172441	0.00928332
LOC106570853	LOC106570853	XR_001320786.1	uncharacterized LOC106570853%2C transcript variant X3	-1.61985	6.52601e-05	0.000671748
LOC106584331	LOC106584331	XM_014169503.1	ELAV-like protein 4%2C transcript variant X7	-1.6199	6.35736e-07	1.4585e-05
LOC106586079	LOC106586079	NA	NA	-1.6314	1.76369e-08	7.08763e-07
LOC106585332	LOC106585332	XM_014171423.1	tumor necrosis factor ligand superfamily member 15-like	-1.6492	4.23633e-07	1.03816e-05
LOC106566792	LOC106566792	XM_014135182.1	protein bassoon-like%2C transcript variant X1	-1.67348	1.46341e-12	1.95825e-10
LOC106581822	gpd2	XM_014164200.1	glycerol-3-phosphate dehydrogenase 2 (mitochondrial)%2C transcript variant X2	-1.70889	2.07487e-09	1.13196e-07
LOC106580807	LOC106580807	XM_014162265.1	semaphorin-7A-like	-1.70943	4.00856e-12	4.76212e-10
LOC106602652	LOC106602652	XM_014195406.1	mucin-5AC-like	-1.72084	7.28455e-05	0.000735874
LOC106575327	LOC106575327	XM_014151807.1	LON peptidase N-terminal domain and RING finger protein 2-like	-1.72119	1.7019e-14	4.28403e-12
LOC106603364	LOC106603364	XM_014196939.1	sodium channel subunit beta-4-like%2C transcript variant X2	-1.7377	2.09573e-08	8.14663e-07
LOC106609213	LOC106609213	XM_014207740.1	uncharacterized LOC106609213%2C transcript variant X1	-1.76591	3.1032e-12	3.78653e-10
LOC106607990	LOC106607990	XR_001329357.1	uncharacterized LOC106607990	-1.84306	2.35376e-14	5.76366e-12
LOC106575301	LOC106575301	XM_014151743.1	sodium channel protein type 2 subunit alpha-like%2C transcript variant X1	-1.84794	4.7544e-10	3.17513e-08
LOC100194860	gbrd	NM_001139889.1	Gamma-aminobutyric acid receptor subunit delta	-1.88164	1.81688e-13	3.28646e-11
LOC106607156	LOC106607156	XM_014203794.1	heat-stable enterotoxin receptor-like	-1.90534	5.56146e-06	9.01351e-05
LOC106597793	LOC106597793	XM_014188930.1	mucin-5B-like	-1.92295	9.0813e-05	0.000877794
LOC106587082	LOC106587082	XR_001324363.1	uncharacterized LOC106587082	-1.93718	0.000360611	0.00268415
LOC106609418	LOC106609418	XM_014208219.1	putative ferric-chelate reductase 1	-1.99406	1.81727e-06	3.51502e-05
LOC106599179	LOC106599179	XM_014190297.1	mucin-5AC-like	-1.99527	0.00157038	0.00862091
LOC106587441	LOC106587441	XM_014175839.1	intestinal mucin-like protein	-2.02071	0.00014123	0.00126555
LOC106597983	LOC106597983	XM_014189083.1	intestinal mucin-like protein	-2.03404	0.000133656	0.00120851
LOC106581781	LOC106581781	XM_014164075.1	collagen alpha-1(XXVIII) chain-like%2C transcript variant X2	-2.03973	1.66312e-10	1.26566e-08
LOC106591145	LOC106591145	XM_014182333.1	intestinal mucin-like protein	-2.0492	2.86647e-05	0.000344974
LOC106606842	LOC106606842	XM_014203225.1	acid-sensing ion channel 2	-2.05924	2.31437e-05	0.000288963
LOC106596831	LOC106596831	XM_014188090.1	intestinal mucin-like protein	-2.09322	1.1824e-05	0.000168829
LOC106597204	LOC106597204	XM_014188425.1	pinopsin-like	-2.10916	3.26438e-22	5.87524e-19
LOC106587462	LOC106587462	XM_014175874.1	mucin-5B-like	-2.11882	1.95289e-05	0.000252683
LOC106594819	LOC106594819	XM_014186204.1	corticosteroid 11-beta-dehydrogenase isozyme 2-like	-2.1501	5.89384e-38	3.88795e-34
LOC106588522	LOC106588522	XM_014177637.1	mucin-2-like	-2.30611	0.000370311	0.00274161
LOC106566856	LOC106566856	XM_014135351.1	succinate dehydrogenase [ubiquinone] iron-sulfur subunit%2C mitochondrial-like	-2.32159	2.01343e-20	2.33791e-17
LOC106609931	LOC106609931	XM_014208969.1	GATA zinc finger domain-containing protein 14-like	-2.32201	1.24666e-09	7.33249e-08
LOC106596194	LOC106596194	XR_001326619.1	uncharacterized LOC106596194%2C transcript variant X1	-2.35241	0.000147537	0.00131292
LOC106585409	LOC106585409	XM_014171569.1	spermatid perinuclear RNA-binding protein-like	-2.41467	4.07082e-05	0.000457773
LOC106569855	LOC106569855	XM_014141536.1	cell wall protein DAN4-like	-2.46441	3.48226e-06	6.05836e-05
LOC106586762	LOC106586762	XM_014174368.1	growth hormone-regulated TBC protein 1-A-like	-2.47632	1.36275e-18	9.4334e-16
LOC106598636	LOC106598636	XM_014189659.1	uncharacterized LOC106598636	-2.49538	2.38944e-07	6.44754e-06
LOC106598455	LOC106598455	XM_014189499.1	mucin-5AC-like	-2.50504	0.000233445	0.00190104
LOC106598650	LOC106598650	XM_014189666.1	mucin-5AC-like	-2.56111	0.00038725	0.00284362
LOC106591429	LOC106591429	XM_014182643.1	mucin-5AC-like	-2.5667	0.000307412	0.00236444
LOC106570133	LOC106570133	XM_014142171.1	mucin-5AC-like	-2.58494	5.88186e-13	9.16552e-11
LOC106596671	LOC106596671	XM_014187940.1	protein APCDD1-like	-2.63789	2.97005e-18	2.01717e-15
LOC106592077	LOC106592077	XM_014183383.1	UPF0392 protein F13G3.3-like%2C transcript variant X3	-2.72377	1.53059e-05	0.000208299
LOC106606833	LOC106606833	XM_014203242.1	uncharacterized LOC106606833	-2.73374	1.32599e-10	1.04443e-08
LOC106591456	LOC106591456	NA	NA	-2.76826	1.0267e-05	0.000151031
LOC106606422	LOC106606422	XM_014202639.1	uncharacterized LOC106606422	-2.77922	2.74071e-08	1.03738e-06
LOC106599213	LOC106599213	XR_001327382.1	uncharacterized LOC106599213	-2.7928	6.24964e-07	1.43838e-05
LOC106597721	LOC106597721	XM_014188872.1	uncharacterized LOC106597721	-2.88075	6.15915e-09	2.9019e-07
LOC106570132	LOC106570132	XM_014142169.1	mucin-5AC-like	-2.99199	2.59987e-13	4.4353e-11
LOC106593521	LOC106593521	XM_014184863.1	uncharacterized LOC106593521%2C transcript variant X3	-3.30301	0.000531177	0.00366428
LOC106569859	LOC106569859	XR_001320571.1	uncharacterized LOC106569859	-3.43398	7.4496e-12	8.27892e-10
LOC106605425	LOC106605425	XM_014201067.1	metalloreductase STEAP4-like	-3.48589	0.000124715	0.00114318
LOC106570884	LOC106570884	XM_014143450.1	perforin-1-like	-3.96126	6.12337e-08	2.03901e-06
LOC106579672	LOC106579672	NA	NA	-4.21373	0.00131568	0.00753169
LOC106605273	LOC106605273	XM_014200730.1	cysteine-rich venom protein ophanin-like	-5.67451	9.44096e-06	0.000140778
